# Supplementary material
Source: PubMed Central journal article supplement (PMC2014731)
Supplement: 07_065_Shanley_Suppl_Data1.pdf [file 07_065_Shanley_Suppl_Data1.pdf]

| Name     | Synonyms    | Description                                                                                       |
|----------|-------------|---------------------------------------------------------------------------------------------------|
| BCL2     | AW986256    | B-cell CLL/lymphoma 2                                                                             |
| BCLAF1   | 2610102K    | BCL2-associated transcription factor 1                                                            |
| CBLB     | AI429560,   | Cas-Br-M (murine) ecotropic retroviral transforming sequence b                                    |
| CD2      | CD2R, Ery   | CD2 molecule                                                                                      |
| CD247    | AW552088    | CD247 molecule                                                                                    |
| CD28     | CD28 ANT    | CD28 molecule                                                                                     |
| CD3D     | CD3-DELT    | CD3d molecule, delta (CD3-TCR complex)                                                            |
| CD3E     | AI504783,   | CD3e molecule, epsilon (CD3-TCR complex)                                                          |
| CD3G     | CD3-GAM     | CD3g molecule, gamma (CD3-TCR complex)                                                            |
| CD79A    | BCR-IGA,    | CD79a molecule, immunoglobulin-associated alpha                                                   |
| CD8A     | BB154331    | CD8a molecule                                                                                     |
| EPHA4    | 2900005C:   | EPH receptor A4                                                                                   |
| FYN      | AI448320,   | FYN oncogene related to SRC, FGR, YES                                                             |
| GZMA     | AW494114    | granzyme A (granzyme 1, cytotoxic T-lymphocyte-associated serine esterase 3)                      |
| ITGA4    | Alpha4 Int  | integrin, alpha 4 (antigen CD49D, alpha 4 subunit of VLA-4 receptor)                              |
| ITK      | EMT, Itk (p | IL2-inducible T-cell kinase                                                                       |
| LAT      | LAT1, MG    | linker for activation of T cells                                                                  |
| LCK      | Hck-3, LCK  | lymphocyte-specific protein tyrosine kinase                                                       |
| MAL      | MALGENE     | mal, T-cell differentiation protein                                                               |
| MYBL1    | A-MYB, M    | v-myb myeloblastosis viral oncogene homolog (avian)-like 1                                        |
| NOSIP    | 2310061K    | nitric oxide synthase interacting protein                                                         |
| PAWR     | PAR-4       | PRKC, apoptosis, WT1, regulator                                                                   |
| PMAIP1   | APR, NOX    | phorbol-12-myristate-13-acetate-induced protein 1                                                 |
| PRF1     | Cyta, FLH   | perforin 1 (pore forming protein)                                                                 |
| PRKCQ    | A130035A    | protein kinase C, theta                                                                           |
| RBM3     | 2600016C    | RNA binding motif (RNP1, RRM) protein 3                                                           |
| SCAP1    | 1700091G    | src family associated phosphoprotein 1                                                            |
| SET      | 2610030F    | SET translocation (myeloid leukemia-associated)                                                   |
| SMARCA5  | 4933427E:   | SWI/SNF related, matrix associated, actin dependent regulator of chromatin, subfamily a, member 5 |
| SOX4     | AA682046    | SRY (sex determining region Y)-box 4                                                              |
| SRP72    | 5730576P    | signal recognition particle 72kDa                                                                 |
| TNFRSF17 | BCM, BCM    | tumor necrosis factor receptor superfamily, member 17                                             |
| TRA@     | C6.1A, FL   | T cell receptor alpha locus                                                                       |
| TRAT1    | C030046M    | T cell receptor associated transmembrane adaptor 1                                                |
| ZAP70    | 70kDa, AI3  | zeta-chain (TCR) associated protein kinase 70kDa                                                  |

| Affymetrix | Location  | Family       | Drugs       | Entrez Ger | Entrez Ger | Entrez Gene | ID for Rat |
|------------|-----------|--------------|-------------|------------|------------|-------------|------------|
| 203685_at  | Cytoplasm | other        | oblimerser  | 596        | 12043      | 24224       |            |
| 201084_s_  | Nucleus   | transcriptic |             | 9774       | 72567      | 293017      |            |
| 227900_at  | Nucleus   | other        |             | 868        | 208650     | 171136      |            |
| 205831_at  | Plasma M  | transmemt    | alefacept ; | 914        | 12481      | 497761      |            |
| 210031_at  | Plasma M  | transmemt    | visilizumat | 919        | 12503      | 25300       |            |
| 206545_at  | Plasma M  | other        |             | 940        | 12487      | 25660       |            |
| 213539_at  | Plasma M  | transmemt    | visilizumat | 915        | 12500      | 25710       |            |
| 205456_at  | Plasma M  | transmemt    | visilizumat | 916        | 12501      | 315609      |            |
| 206804_at  | Plasma M  | transmemt    | visilizumat | 917        | 12502      | 300678      |            |
| 205049_s_  | Plasma M  | transmemt    |             | 973        | 12518      |             |            |
| 205758_at  | Plasma M  | other        |             | 925        | 12525      | 24930       |            |
| 227449_at  | Plasma M  | kinase       |             | 2043       | 13838      | 316539      |            |
| 212486_s_  | Plasma M  | kinase       | dasatinib   | 2534       | 14360      | 25150       |            |
| 205488_at  | Cytoplasm | peptidase    |             | 3001       | 14938      | 266708      |            |
| 205884_at  | Plasma M  | other        | natalizuma  | 3676       | 16401      | 311144      |            |
| 211339_s_  | Cytoplasm | kinase       |             | 3702       | 16428      | 363577      |            |
| 211005_at  | Plasma M  | other        |             | 27040      | 16797      | 81511       |            |
| 204890_s_  | Cytoplasm | kinase       | dasatinib   | 3932       | 16818      | 313050      |            |
| 204777_s_  | Plasma M  | transporter  |             | 4118       | 17153      | 25263       |            |
| 213906_at  | Nucleus   | transcriptic |             | 4603       | 17864      | 297783      |            |
| 217950_at  | Cytoplasm | other        |             | 51070      | 66394      | 292894      |            |
| 226223_at  | Nucleus   | transcriptic |             | 5074       | 114774     | 64513       |            |
| 204286_s_  | Cytoplasm | other        |             | 5366       | 58801      | 492821      |            |
| 214617_at  | Cytoplasm | other        |             | 5551       | 18646      | 50669       |            |
| 210038_at  | Cytoplasm | kinase       |             | 5588       | 18761      | 85420       |            |
| 208319_s_  | Nucleus   | other        |             | 5935       | 19652      | 114488      |            |
| 205790_at  | Cytoplasm | kinase       |             | 8631       | 78473      | 286975      |            |
| 200631_s_  | Nucleus   | phosphata    |             | 6418       | 56086      | 307947      |            |
| 213251_at  | Nucleus   | transcriptic |             | 8467       | 93762      | 307766      |            |
| 201417_at  | Nucleus   | transcriptic |             | 6659       | 20677      | 364712      |            |
| 208801_at  | Nucleus   | kinase       |             | 6731       | 66661      | 289566      |            |
| 206641_at  | Plasma M  | other        |             | 608        | 21935      | 287034      |            |
| 217143_s_  | Plasma M  | other        |             | 6955       | 21473      | 364379      |            |
| 217147_s_  | Plasma M  | other        |             | 50852      | 77647      |             |            |
| 214032_at  | Plasma M  | kinase       |             | 7535       | 22637      | 301348      |            |

©2000-2006 Ingenuity Systems, Inc. All rights reserved.

| Name     | Synonyms   | Description                                                                              | Affymetrix | Location   | Family       | Drugs      | Entrez | Ger   | Entrez | Ger   | Entrez | Gene ID for Rat |
|----------|------------|------------------------------------------------------------------------------------------|------------|------------|--------------|------------|--------|-------|--------|-------|--------|-----------------|
| ATF1     | TREB36     | activating transcription factor 1                                                        | 1558233_s  | Nucleus    | transcriptic |            | 466    |       | 11908  |       | 315305 |                 |
| CDC14A   | A830059A   | CDC14 cell division cycle 14 homolog A (S. cerevisiae)                                   | 205288_at  | Nucleus    | phosphata    |            | 8556   |       | 229776 |       | 310806 |                 |
| CIITA    | C2TA, C2T  | class II, major histocompatibility complex, transactivator                               | 205101_at  | Nucleus    | transcriptic |            | 4261   |       | 12265  |       | 85483  |                 |
| CR2      | C3DR, CD   | complement component (3d/Epstein Barr virus) receptor 2                                  | 205544_s   | Plasma M   | transmemt    |            | 1380   |       | 12902  |       | 289395 |                 |
| CXCL5    | AMCF-II, c | chemokine (C-X-C motif) ligand 5                                                         | 214974_x   | Extracellu | cytokine     |            | 6374   |       | 20311  |       | 60665  |                 |
| DDX17    | 2610007K   | DEAD (Asp-Glu-Ala-Asp) box polypeptide 17                                                | 213998_s   | Nucleus    | enzyme       |            | 10521  |       | 67040  |       | 315133 |                 |
| FBL      | AL022665   | fibrillarin                                                                              | 211623_s   | Nucleus    | other        |            | 2091   |       | 14113  |       | 292747 |                 |
| HLA-DMA  | CLASS II F | major histocompatibility complex, class II, DM alpha                                     | 217478_s   | Plasma M   | transmemt    |            | 3108   |       | 14998  |       | 294274 |                 |
| HLA-DMB  | A1385589   | major histocompatibility complex, class II, DM beta                                      | 203932_at  | Plasma M   | transmemt    |            | 3109   | 14999 | 15001  |       | 294273 |                 |
| HLA-DOA  | H-2Oa, H2  | major histocompatibility complex, class II, DO alpha                                     | 226878_at  | Plasma M   | transmemt    |            | 3111   |       | 15001  |       | 24984  |                 |
| HLA-DOB  | DOB, H-2f  | major histocompatibility complex, class II, DO beta                                      | 205671_s   | Plasma M   | transmemt    |            | 3112   |       | 15002  |       | 365542 |                 |
| HLA-DQA1 | AALPHA, A  | major histocompatibility complex, class II, DQ alpha 1                                   | 212671_s   | Plasma M   | transmemt    |            | 3117   |       | 14960  |       | 309621 |                 |
| HLA-DQB1 | CELIAC1,   | major histocompatibility complex, class II, DQ beta 1                                    | 212999_x   | Plasma M   | transmemt    |            | 3119   |       |        |       |        |                 |
| HLA-DRA  | A1323765,  | major histocompatibility complex, class II, DR alpha                                     | 208894_at  | Plasma M   | transmemt    |            | 3122   |       | 14968  |       | 294269 |                 |
| HLA-DRB1 | DR-7, DR-  | major histocompatibility complex, class II, DR beta 1                                    | 236203_at  | Plasma M   | transmemt    |            | 3123   |       | 14969  |       | 294270 |                 |
| HNRPA1   | A1, D15E1  | heterogeneous nuclear ribonucleoprotein A1                                               | 214280_x   | Nucleus    | other        |            | 3178   |       | 15382  |       | 29578  |                 |
| HNRPD    | AUF1, AUF  | heterogeneous nuclear ribonucleoprotein D (AU-rich element RNA binding protein 1, 37kDa) | 213359_at  | Nucleus    | other        |            | 3184   |       | 11991  |       | 79256  |                 |
| LRPPRC   | 3110001K   | leucine-rich PPR-motif containing                                                        | 211971_s   | Cytoplasm  | other        |            | 10128  |       | 72416  |       | 313867 |                 |
| NOLC1    | 3230402K   | nucleolar and coiled-body phosphoprotein 1                                               | 211951_at  | Nucleus    | other        |            | 9221   |       | 70769  |       | 64896  |                 |
| NOP5/NOI | HSPC120,   | nucleolar protein NOP5/NOP58                                                             | 223096_at  | Nucleus    | enzyme       |            | 51602  |       | 55989  |       | 60373  |                 |
| NPM1     | B23, B23N  | nucleophosmin (nucleolar phosphoprotein B23, numatrin)                                   | 200063_s   | Nucleus    | transcriptic |            | 4869   |       | 18148  |       | 25498  |                 |
| PTGDR    | AS1, ASR1  | prostaglandin D2 receptor (DP)                                                           | 215894_at  | Plasma M   | G-protein c  |            | 5729   |       | 19214  | 63889 | 498475 |                 |
| PTGER4   | E PROST4   | prostaglandin E receptor 4 (subtype EP4)                                                 | 204897_at  | Plasma M   | G-protein c  | misoprost  | 5734   |       | 19219  |       | 84023  |                 |
| PTGS2    | COX-2, gri | prostaglandin-endoperoxide synthase 2 (prostaglandin G/H synthase and cyclooxygenase)    | 204748_at  | Cytoplasm  | enzyme       | acetaminol | 5743   |       | 19225  |       | 29527  |                 |
| RBMX     | hnRNP-G,   | RNA binding motif protein, X-linked                                                      | 225310_at  | Nucleus    | other        |            | 27316  |       | 19655  |       |        |                 |
| RFX5     | Rfx5 (pred | regulatory factor X, 5 (influences HLA class II expression)                              | 202963_at  | Nucleus    | transcriptic |            | 5993   |       | 53970  |       | 310659 |                 |
| RFXAP    | 5730495K   | regulatory factor X-associated protein                                                   | 229431_at  | Nucleus    | transcriptic |            | 5994   |       | 170767 |       |        |                 |
| RPS6KA5  | 3110005L1  | ribosomal protein S6 kinase, 90kDa, polypeptide 5                                        | 204633_s   | Nucleus    | kinase       |            | 9252   |       | 73086  |       | 314384 |                 |
| SFPQ     | 1110004P2  | splicing factor proline/glutamine-rich (polypyrimidine tract binding protein associated) | 214016_s   | Nucleus    | other        |            | 6421   |       | 71514  |       | 252855 |                 |
| SFRS12   | 8430401B   | splicing factor, arginine/serine-rich 12                                                 | 212721_at  | Nucleus    | other        |            | 140890 |       | 218543 |       | 56763  |                 |
| SFRS6    | 1210001E   | splicing factor, arginine/serine-rich 6                                                  | 208804_s   | Nucleus    | other        |            | 6431   |       | 67996  |       | 362264 |                 |
| SFRS7    | 35kDa, 94  | splicing factor, arginine/serine-rich 7, 35kDa                                           | 214141_x   | Nucleus    | other        |            | 6432   |       | 225027 |       | 362687 |                 |
| SNRPA1   | 1500015N   | small nuclear ribonucleoprotein polypeptide A1                                           | 242146_at  | Nucleus    | other        |            | 6627   |       | 68981  |       | 292997 |                 |
| TCERG1   | 2410022J   | transcription elongation regulator 1                                                     | 202396_at  | Nucleus    | transcriptic |            | 10915  |       | 56070  |       | 307474 |                 |
| ZRANB2   | A1227013,  | zinc finger, RAN-binding domain containing 2                                             | 223716_s   | Nucleus    | transcriptic |            | 9406   |       | 53861  |       | 58821  |                 |

| Name     | Synonyms  | Description                                                                                   | Affymetrix | Location   | Family       | Drugs       | Entrez | Ger | Entrez | Ger | Entrez | Gene ID for Rat |
|----------|-----------|-----------------------------------------------------------------------------------------------|------------|------------|--------------|-------------|--------|-----|--------|-----|--------|-----------------|
| CCND2    | 2600016F0 | cyclin D2                                                                                     | 200953_s_  | Nucleus    | other        |             | 894    |     | 12444  |     | 64033  |                 |
| CDKN1C   | AL024410, | cyclin-dependent kinase inhibitor 1C (p57, Kip2)                                              | 213348_at  | Nucleus    | other        |             | 10238  |     | 12577  |     | 246060 |                 |
| CDR2     | AA617262  | cerebellar degeneration-related protein 2, 62kDa                                              | 209501_at  | Cytoplasm  | other        |             | 1039   |     | 12585  |     | 308958 |                 |
| CHRM3    | HM3, M3,  | cholinergic receptor, muscarinic 3                                                            | 1557733_c  | Plasma M   | G-protein c  | fesoterodir | 1131   |     | 12671  |     | 24260  |                 |
| DMTF1    | Dimp, DMF | cyclin D binding myb-like transcription factor 1                                              | 203301_s_  | Nucleus    | transcriptic |             | 9988   |     | 23857  |     | 114485 |                 |
| E2F5     |           | E2F transcription factor 5, p130-binding                                                      | 221586_s_  | Nucleus    | transcriptic |             | 1875   |     | 13559  |     | 116651 |                 |
| ETS1     | AI196000, | v-ets erythroblastosis virus E26 oncogene homolog 1 (avian)                                   | 224833_at  | Nucleus    | transcriptic |             | 2113   |     | 23871  |     | 24356  |                 |
| GATA3    | HDR, MGC  | GATA binding protein 3                                                                        | 209604_s_  | Nucleus    | transcriptic |             | 2625   |     | 14462  |     | 85471  |                 |
| GZMB     | AI553453, | granzyme B (granzyme 2, cytotoxic T-lymphocyte-associated serine esterase 1)                  | 210164_at  | Cytoplasm  | peptidase    |             | 3002   |     | 14939  |     | 171528 |                 |
| GZMM     | Granzyme  | granzyme M (lymphocyte met-ase 1)                                                             | 207460_at  | Cytoplasm  | peptidase    |             | 3004   |     | 16904  |     | 29252  |                 |
| HDAC9    | AV022454, | histone deacetylase 9                                                                         | 205659_at  | Nucleus    | transcriptic | PXD101 ,v   | 9734   |     | 79221  |     | 500642 |                 |
| HSF2     | AI661205, | heat shock transcription factor 2                                                             | 209657_s_  | Nucleus    | transcriptic |             | 3298   |     | 15500  |     | 64441  |                 |
| ICOS     | AILIM, CD | inducible T-cell co-stimulator                                                                | 210439_at  | Plasma M   | other        |             | 29851  |     | 54167  |     | 64545  |                 |
| ID3      | HEIR-1, H | inhibitor of DNA binding 3, dominant negative helix-loop-helix protein                        | 207826_s_  | Nucleus    | transcriptic |             | 3399   |     | 15903  |     | 25585  |                 |
| IGHM     | AI326478, | immunoglobulin heavy constant mu                                                              | 212827_at  | Plasma M   | transmemt    |             | 3507   |     | 16019  |     |        |                 |
| IL7R     | CD127, C  | interleukin 7 receptor                                                                        | 205798_at  | Plasma M   | transmemt    |             | 3575   |     | 16197  |     | 294797 |                 |
| LEF1     | 3000002B  | lymphoid enhancer-binding factor 1                                                            | 221558_s_  | Nucleus    | transcriptic |             | 51176  |     | 16842  |     | 161452 |                 |
| LTB      | AI662801, | lymphotoxin beta (TNF superfamily, member 3)                                                  | 207339_s_  | Extracellu | cytokine     |             | 4050   |     | 16994  |     | 361795 |                 |
| MAF      | 2810401A: | v-maf musculoaponeurotic fibrosarcoma oncogene homolog (avian)                                | 209348_s_  | Nucleus    | transcriptic |             | 4094   |     | 17132  |     | 54267  |                 |
| MEF2C    | 5430401D  | MADS box transcription enhancer factor 2, polypeptide C (myocyte enhancer factor 2C)          | 209199_s_  | Nucleus    | transcriptic |             | 4208   |     | 17260  |     | 499495 |                 |
| NFATC2IP | D7Ert304  | nuclear factor of activated T-cells, cytoplasmic, calcineurin-dependent 2 interacting protein | 229235_at  | Nucleus    | other        |             | 84901  |     | 18020  |     | 308983 |                 |
| NOG      | NOGGIN,   | noggin                                                                                        | 231798_at  | Extracellu | other        |             | 9241   |     | 18121  |     | 25495  |                 |
| POU2AF1  | BOB.1, BC | POU domain, class 2, associating factor 1                                                     | 205267_at  | Nucleus    | transcriptic |             | 5450   |     | 18985  |     |        |                 |
| PSMB2    | AU045357  | proteasome (prosome, macropain) subunit, beta type, 2                                         | 231323_at  | Cytoplasm  | peptidase    |             | 5690   |     | 26445  |     | 29675  |                 |
| PTCH     | A230106A  | patched homolog (Drosophila)                                                                  | 209815_at  | Plasma M   | transmemt    |             | 5727   |     | 19206  |     | 89830  |                 |
| RBL2     | FLJ26459, | retinoblastoma-like 2 (p130)                                                                  | 212331_at  | Nucleus    | other        |             | 5934   |     | 19651  |     | 81758  |                 |
| RUNX2    | AML3, C   | runt-related transcription factor 2                                                           | 232231_at  | Nucleus    | transcriptic |             | 860    |     | 12393  |     | 367218 |                 |
| SERPINB5 | BB283241  | serpin peptidase inhibitor, clade B (ovalbumin), member 9                                     | 209723_at  | Cytoplasm  | other        |             | 5272   |     | 20723  |     | 361241 |                 |
| TCF12    | ALF1, HEE | transcription factor 12 (HTF4, helix-loop-helix transcription factors 4)                      | 238041_at  | Nucleus    | transcriptic |             | 6938   |     | 21406  |     | 25720  |                 |
| TCF3     | A1, AA408 | transcription factor 3 (E2A immunoglobulin enhancer binding factors E12/E47)                  | 209153_s_  | Nucleus    | transcriptic |             | 6929   |     | 21423  |     | 171046 |                 |
| TNFRSF7  | CD27, MG  | tumor necrosis factor receptor superfamily, member 7                                          | 206150_at  | Plasma M   | transmemt    |             | 939    |     | 21940  |     | 246340 |                 |
| TOP2B    | D230016L  | topoisomerase (DNA) II beta 180kDa                                                            | 211987_at  | Nucleus    | enzyme       | etoposide   | 7155   |     | 21974  |     | 85339  |                 |
| TRAF5    | MGC:3978  | TNF receptor-associated factor 5                                                              | 204352_at  | Cytoplasm  | transporter  |             | 7188   |     | 22033  |     |        |                 |
| UBA2     | AA986091  | SUMO-1 activating enzyme subunit 2                                                            | 201177_s_  | Cytoplasm  | enzyme       |             | 10054  |     | 50995  |     | 308508 |                 |
| UBE2I    | 5830467E  | ubiquitin-conjugating enzyme E2I (UBC9 homolog, yeast)                                        | 208760_at  | Nucleus    | enzyme       |             | 7329   |     | 22196  |     | 25573  |                 |

| Name       | Synonyms    | Description                                                                                       |
|------------|-------------|---------------------------------------------------------------------------------------------------|
| BCL2       | AW986256    | B-cell CLL/lymphoma 2                                                                             |
| BCLAF1     | 2610102K    | BCL2-associated transcription factor 1                                                            |
| BNIP3 (inc | BNIP3, MC   | BCL2/adenovirus E1B 19kDa interacting protein 3                                                   |
| CBLB       | AI429560,   | Cas-Br-M (murine) ecotropic retroviral transforming sequence b                                    |
| CD2        | CD2R, Ery   | CD2 molecule                                                                                      |
| CD247      | AW552088    | CD247 molecule                                                                                    |
| CD28       | CD28 ANT    | CD28 molecule                                                                                     |
| CD3D       | CD3-DELT    | CD3d molecule, delta (CD3-TCR complex)                                                            |
| CD3E       | AI504783,   | CD3e molecule, epsilon (CD3-TCR complex)                                                          |
| CD3G       | CD3-GAM     | CD3g molecule, gamma (CD3-TCR complex)                                                            |
| CD79A      | BCR-IGA,    | CD79a molecule, immunoglobulin-associated alpha                                                   |
| FYN        | AI448320,   | FYN oncogene related to SRC, FGR, YES                                                             |
| GZMA       | AW494114    | granzyme A (granzyme 1, cytotoxic T-lymphocyte-associated serine esterase 3)                      |
| GZMB       | AI553453,   | granzyme B (granzyme 2, cytotoxic T-lymphocyte-associated serine esterase 1)                      |
| GZMM       | Granzyme    | granzyme M (lymphocyte met-ase 1)                                                                 |
| ITK        | EMT, Itk (p | IL2-inducible T-cell kinase                                                                       |
| LAT        | LAT1, MG    | linker for activation of T cells                                                                  |
| LCK        | Hck-3, LCK  | lymphocyte-specific protein tyrosine kinase                                                       |
| MAL        | MALGENE     | mal, T-cell differentiation protein                                                               |
| MOAP1      | 1700051B    | modulator of apoptosis 1                                                                          |
| MYBL1      | A-MYB, M    | v-myb myeloblastosis viral oncogene homolog (avian)-like 1                                        |
| PAWR       | PAR-4       | PRKC, apoptosis, WT1, regulator                                                                   |
| PDE4B      | DKFZp686    | phosphodiesterase 4B, cAMP-specific (phosphodiesterase E4 dunce homolog, Drosophila)              |
| PMAIP1     | APR, NOX    | phorbol-12-myristate-13-acetate-induced protein 1                                                 |
| PRF1       | Cyta, FLH   | perforin 1 (pore forming protein)                                                                 |
| SCAP1      | 1700091G    | src family associated phosphoprotein 1                                                            |
| SERPINC    | BB283241    | serpin peptidase inhibitor, clade B (ovalbumin), member 9                                         |
| SET        | 2610030F    | SET translocation (myeloid leukemia-associated)                                                   |
| SMARCA5    | 4933427E    | SWI/SNF related, matrix associated, actin dependent regulator of chromatin, subfamily a, member 5 |
| SOX4       | AA682046    | SRY (sex determining region Y)-box 4                                                              |
| SRP72      | 5730576P    | signal recognition particle 72kDa                                                                 |
| TNFRSF17   | BCM, BCM    | tumor necrosis factor receptor superfamily, member 17                                             |
| TRA@       | C6.1A, FL   | T cell receptor alpha locus                                                                       |
| TRAT1      | C030046M    | T cell receptor associated transmembrane adaptor 1                                                |
| ZAP70      | 70kDa, AI   | zeta-chain (TCR) associated protein kinase 70kDa                                                  |

| Affymetrix | Location  | Family       | Drugs         | Entrez Ger | Entrez Ger | Entrez Gene | ID for Rat |
|------------|-----------|--------------|---------------|------------|------------|-------------|------------|
| 203685_at  | Cytoplasm | other        | oblimerser    | 596        | 12043      | 24224       |            |
| 201084_s_  | Nucleus   | transcriptic |               | 9774       | 72567      | 293017      |            |
| 201849_at  | Cytoplasm | other        |               | 664        |            | 84480       |            |
| 227900_at  | Nucleus   | other        |               | 868        | 208650     | 171136      |            |
| 205831_at  | Plasma M  | transmemt    | alefacept ,:  | 914        | 12481      | 497761      |            |
| 210031_at  | Plasma M  | transmemt    | visilizumat   | 919        | 12503      | 25300       |            |
| 206545_at  | Plasma M  | other        |               | 940        | 12487      | 25660       |            |
| 213539_at  | Plasma M  | transmemt    | visilizumat   | 915        | 12500      | 25710       |            |
| 205456_at  | Plasma M  | transmemt    | visilizumat   | 916        | 12501      | 315609      |            |
| 206804_at  | Plasma M  | transmemt    | visilizumat   | 917        | 12502      | 300678      |            |
| 205049_s_  | Plasma M  | transmemt    |               | 973        | 12518      |             |            |
| 212486_s_  | Plasma M  | kinase       | dasatinib     | 2534       | 14360      | 25150       |            |
| 205488_at  | Cytoplasm | peptidase    |               | 3001       | 14938      | 266708      |            |
| 210164_at  | Cytoplasm | peptidase    |               | 3002       | 14939      | 171528      |            |
| 207460_at  | Cytoplasm | peptidase    |               | 3004       | 16904      | 29252       |            |
| 211339_s_  | Cytoplasm | kinase       |               | 3702       | 16428      | 363577      |            |
| 211005_at  | Plasma M  | other        |               | 27040      | 16797      | 81511       |            |
| 204890_s_  | Cytoplasm | kinase       | dasatinib     | 3932       | 16818      | 313050      |            |
| 204777_s_  | Plasma M  | transporter  |               | 4118       | 17153      | 25263       |            |
| 212508_at  | Cytoplasm | other        |               | 64112      | 64113      | 299261      |            |
| 213906_at  | Nucleus   | transcriptic |               | 4603       | 17864      | 297783      |            |
| 226223_at  | Nucleus   | transcriptic |               | 5074       | 114774     | 64513       |            |
| 203708_at  | Cytoplasm | enzyme       | arofylline ,t | 5142       | 18578      | 24626       |            |
| 204286_s_  | Cytoplasm | other        |               | 5366       | 58801      | 492821      |            |
| 214617_at  | Cytoplasm | other        |               | 5551       | 18646      | 50669       |            |
| 205790_at  | Cytoplasm | kinase       |               | 8631       | 78473      | 286975      |            |
| 209723_at  | Cytoplasm | other        |               | 5272       | 20723      | 361241      |            |
| 213047_x_  | Nucleus   | phosphata    |               | 6418       | 56086      | 307947      |            |
| 213251_at  | Nucleus   | transcriptic |               | 8467       | 93762      | 307766      |            |
| 201417_at  | Nucleus   | transcriptic |               | 6659       | 20677      | 364712      |            |
| 208802_at  | Nucleus   | kinase       |               | 6731       | 66661      | 289566      |            |
| 206641_at  | Plasma M  | other        |               | 608        | 21935      | 287034      |            |
| 217143_s_  | Plasma M  | other        |               | 6955       | 21473      | 364379      |            |
| 217147_s_  | Plasma M  | other        |               | 50852      | 77647      |             |            |
| 1555613_ε  | Plasma M  | kinase       |               | 7535       | 22637      | 301348      |            |

| Name    | Synonyms        | Description                                                                               | Affymetrix | Location   | Family       | Drugs      | Entrez | Ger | Entrez | Ger | Entrez | Gene ID for Rat |
|---------|-----------------|-------------------------------------------------------------------------------------------|------------|------------|--------------|------------|--------|-----|--------|-----|--------|-----------------|
| ATF2    | CRE-BP, C       | activating transcription factor 2                                                         | 212984_at  | Nucleus    | transcriptic |            | 1386   |     | 11909  |     | 81647  |                 |
| BLNK    | BASH, Bcl-6     | B-cell linker                                                                             | 207655_s   | Cytoplasm  | other        |            | 29760  |     | 17060  |     | 499356 |                 |
| CD47    | 9130415E        | CD47 molecule                                                                             | 226016_at  | Plasma M   | other        |            | 961    |     | 16423  |     | 29364  |                 |
| CD69    | 5830438K        | CD69 molecule                                                                             | 209795_at  | Plasma M   | transmemt    |            | 969    |     | 12515  |     | 29187  |                 |
| CD72    | CD72c, Ly-6E    | CD72 molecule                                                                             | 215925_s   | Plasma M   | other        |            | 971    |     | 12517  |     | 313498 |                 |
| CR2     | C3DR, CD35      | complement component (3d/Epstein Barr virus) receptor 2                                   | 205544_s   | Plasma M   | transmemt    |            | 1380   |     | 12902  |     | 289395 |                 |
| EPHA4   | 2900005C        | EPH receptor A4                                                                           | 227449_at  | Plasma M   | kinase       |            | 2043   |     | 13838  |     | 316539 |                 |
| GARNL1  | 2310003F        | GTPase activating Rap/RanGAP domain-like 1                                                | 213049_at  | Unknown    | other        |            | 253959 |     | 56784  |     | 56785  |                 |
| GATA3   | HDR, MGC        | GATA binding protein 3                                                                    | 209604_s   | Nucleus    | transcriptic |            | 2625   |     | 14462  |     | 85471  |                 |
| HDAC9   | AV022454        | histone deacetylase 9                                                                     | 205659_at  | Nucleus    | transcriptic | PXD101 ,v  | 9734   |     | 79221  |     | 500642 |                 |
| ICOS    | AILIM, CD28     | inducible T-cell co-stimulator                                                            | 210439_at  | Plasma M   | other        |            | 29851  |     | 54167  |     | 64545  |                 |
| ID3     | HEIR-1, HIR     | inhibitor of DNA binding 3, dominant negative helix-loop-helix protein                    | 207826_s   | Nucleus    | transcriptic |            | 3399   |     | 15903  |     | 25585  |                 |
| IGHM    | A1326478        | immunoglobulin heavy constant mu                                                          | 212827_at  | Plasma M   | transmemt    |            | 3507   |     | 16019  |     |        |                 |
| IGJ     | 9530090F        | immunoglobulin J polypeptide, linker protein for immunoglobulin alpha and mu polypeptides | 212592_at  | Extracellu | other        |            | 3512   |     | 16069  |     | 360922 |                 |
| IL7R    | CD127, CD131    | interleukin 7 receptor                                                                    | 205798_at  | Plasma M   | transmemt    |            | 3575   |     | 16197  |     | 294797 |                 |
| IL8     | 3-10C, AM       | interleukin 8                                                                             | 202859_x   | Extracellu | cytokine     |            | 3576   |     |        |     |        |                 |
| ITGA4   | Alpha4 Integrin | integrin, alpha 4 (antigen CD49D, alpha 4 subunit of VLA-4 receptor)                      | 213416_at  | Plasma M   | other        | natalizuma | 3676   |     | 16401  |     | 311144 |                 |
| ITGA6   | 5033401O        | integrin, alpha 6                                                                         | 201656_at  | Plasma M   | other        |            | 3655   |     | 16403  |     | 114517 |                 |
| LPXN    | 4933402K        | leupaxin                                                                                  | 216250_s   | Cytoplasm  | other        |            | 9404   |     | 107321 |     | 293783 |                 |
| MEF2C   | 5430401D        | MADS box transcription enhancer factor 2, polypeptide C (myocyte enhancer factor 2C)      | 209199_s   | Nucleus    | transcriptic |            | 4208   |     | 17260  |     | 499495 |                 |
| POU2AF1 | BOB.1, BC       | POU domain, class 2, associating factor 1                                                 | 205267_at  | Nucleus    | transcriptic |            | 5450   |     | 18985  |     |        |                 |
| PRKCQ   | A130035A        | protein kinase C, theta                                                                   | 210039_s   | Cytoplasm  | kinase       |            | 5588   |     | 18761  |     | 85420  |                 |
| PTGER4  | E PROSTAGLANDIN | prostaglandin E receptor 4 (subtype EP4)                                                  | 204897_at  | Plasma M   | G-protein c  | misoprostc | 5734   |     | 19219  |     | 84023  |                 |
| RASA2   | 5430433H        | RAS p21 protein activator 2                                                               | 226392_at  | Cytoplasm  | other        |            | 5922   |     | 114713 |     | 25597  |                 |
| RASGRP1 | CALDAG-1        | RAS guanyl releasing protein 1 (calcium and DAG-regulated)                                | 205590_at  | Cytoplasm  | other        |            | 10125  |     | 19419  |     | 29434  |                 |
| RASGRP3 | BC066069        | RAS guanyl releasing protein 3 (calcium and DAG-regulated)                                | 205801_s   | Cytoplasm  | other        |            | 25780  |     | 240168 |     | 313874 |                 |
| RRAS2   | 2610016H        | related RAS viral (r-ras) oncogene homolog 2                                              | 212590_at  | Plasma M   | enzyme       |            | 22800  |     | 66922  |     | 365355 |                 |
| SCYE1   | EMAP-2, E       | small inducible cytokine subfamily E, member 1 (endothelial monocyte-activating)          | 202541_at  | Extracellu | cytokine     |            | 9255   |     | 13722  |     | 114632 |                 |
| SIRPG   | bA77C3.1        | signal-regulatory protein gamma                                                           | 220485_s   | Plasma M   | other        |            | 55423  |     |        |     |        |                 |
| SLC12A2 | BSC, BSC        | solute carrier family 12 (sodium/potassium/chloride transporters), member 2               | 225835_at  | Plasma M   | transporter  | bumetanid  | 6558   |     | 20496  |     | 83629  |                 |
| STK39   | AW227544        | serine threonine kinase 39 (STE20/SPS1 homolog, yeast)                                    | 202786_at  | Nucleus    | kinase       |            | 27347  |     | 53416  |     | 54348  |                 |
| TAF2    | 150kDa, 4       | TAF2 RNA polymerase II, TATA box binding protein (TBP)-associated factor, 150kDa          | 209523_at  | Nucleus    | transcriptic |            | 6873   |     | 319944 |     | 170844 |                 |
| TAF4B   | 105kDa, 2       | TAF4b RNA polymerase II, TATA box binding protein (TBP)-associated factor, 105kDa         | 235020_at  | Nucleus    | transcriptic |            | 6875   |     | 72504  |     | 291773 |                 |
| TCF12   | ALF1, HEE       | transcription factor 12 (HTF4, helix-loop-helix transcription factors 4)                  | 238041_at  | Nucleus    | transcriptic |            | 6938   |     | 21406  |     | 25720  |                 |
| TCF3    | A1, AA408       | transcription factor 3 (E2A immunoglobulin enhancer binding factors E12/E47)              | 209153_s   | Nucleus    | transcriptic |            | 6929   |     | 21423  |     | 171046 |                 |

| Name     | Synonyms    | Description                                                                                                         | Affymetrix | Location   | Family       | Drugs | Entrez | Ger        | Entrez | Ger | Entrez | Gene ID for Rat |
|----------|-------------|---------------------------------------------------------------------------------------------------------------------|------------|------------|--------------|-------|--------|------------|--------|-----|--------|-----------------|
| ATF1     | TREB36      | activating transcription factor 1                                                                                   | 1558233_ε  | Nucleus    | transcriptic |       | 466    |            | 11908  |     | 315305 |                 |
| ATR      | Ataxia-tela | ataxia telangiectasia and Rad3 related                                                                              | 209902_at  | Nucleus    | kinase       |       | 545    | 245000     |        |     | 300942 |                 |
| CCL4     | ACT2, AT7   | chemokine (C-C motif) ligand 4                                                                                      | 204103_at  | Extracellu | cytokine     |       | 6351   |            | 20303  |     | 116637 |                 |
| CCL5     | D17S136E    | chemokine (C-C motif) ligand 5                                                                                      | 1405_i_at  | Extracellu | cytokine     |       | 6352   |            | 20304  |     | 81780  |                 |
| CCR3     | CC-CKR-3    | chemokine (C-C motif) receptor 3                                                                                    | 208304_at  | Plasma M   | G-protein c  |       | 1232   |            | 12771  |     | 117027 |                 |
| CDC14A   | A830059A    | CDC14 cell division cycle 14 homolog A (S. cerevisiae)                                                              | 205288_at  | Nucleus    | phosphata    |       | 8556   | 229776     |        |     | 310806 |                 |
| CIITA    | C2TA, C2T   | class II, major histocompatibility complex, transactivator                                                          | 205101_at  | Nucleus    | transcriptic |       | 4261   |            | 12265  |     | 85483  |                 |
| DDX17    | 2610007K    | DEAD (Asp-Glu-Ala-Asp) box polypeptide 17                                                                           | 213998_s_  | Nucleus    | enzyme       |       | 10521  |            | 67040  |     | 315133 |                 |
| EIF2AK3  | A1427929,   | eukaryotic translation initiation factor 2-alpha kinase 3                                                           | 218696_at  | Cytoplasr  | kinase       |       | 9451   |            | 13666  |     | 29702  |                 |
| GNLY     | 519, D2S6   | granulysin                                                                                                          | 37145_at   | Cytoplasr  | other        |       | 10578  |            |        |     |        |                 |
| HLA-DMB  | A1385589,   | major histocompatibility complex, class II, DM beta                                                                 | 203932_at  | Plasma M   | transmemt    |       | 3109   | 14999 1500 |        |     | 294273 |                 |
| HLA-DOA  | H-2Oa, H2   | major histocompatibility complex, class II, DO alpha                                                                | 226878_at  | Plasma M   | transmemt    |       | 3111   |            | 15001  |     | 24984  |                 |
| HLA-DOB  | DOB, H-2f   | major histocompatibility complex, class II, DO beta                                                                 | 205671_s_  | Plasma M   | transmemt    |       | 3112   |            | 15002  |     | 365542 |                 |
| HLA-DQA1 | AALPHA, A   | major histocompatibility complex, class II, DQ alpha 1                                                              | 212671_s_  | Plasma M   | transmemt    |       | 3117   |            | 14960  |     | 309621 |                 |
| HLA-DQB1 | CELIAC1,    | major histocompatibility complex, class II, DQ beta 1                                                               | 212998_x_  | Plasma M   | transmemt    |       | 3119   |            |        |     |        |                 |
| HLA-DRB1 | DR-7, DR-   | major histocompatibility complex, class II, DR beta 1                                                               | 215193_x_  | Plasma M   | transmemt    |       | 3123   |            | 14969  |     | 294270 |                 |
| HNRPA2B  | 9130414A    | heterogeneous nuclear ribonucleoprotein A2/B1                                                                       | 225107_at  | Nucleus    | other        |       | 3181   |            | 53379  |     | 362361 |                 |
| HNRPU    | AA408410    | heterogeneous nuclear ribonucleoprotein U (scaffold attachment factor A)                                            | 235603_at  | Nucleus    | transporter  |       | 3192   |            | 51810  |     | 117280 |                 |
| HSP90AA  | 86kDa, 89l  | heat shock protein 90kDa alpha (cytosolic), class A member 1                                                        | 210211_s_  | Cytoplasr  | other        |       | 3320   |            | 15519  |     | 299331 |                 |
| HSPA8    | 2410008N    | heat shock 70kDa protein 8                                                                                          | 224187_x_  | Cytoplasr  | enzyme       |       | 3312   |            | 15481  |     | 24468  |                 |
| HSPH1    | 105kDa, A   | heat shock 105kDa/110kDa protein 1                                                                                  | 206976_s_  | Cytoplasr  | other        |       | 10808  |            | 15505  |     | 288444 |                 |
| NPM1     | B23, B23N   | nucleophosmin (nucleolar phosphoprotein B23, numatrin)                                                              | 200063_s_  | Nucleus    | transcriptic |       | 4869   |            | 18148  |     | 25498  |                 |
| PNN      | AU045199    | pinin, desmosome associated protein                                                                                 | 1567214_ε  | Plasma M   | other        |       | 5411   |            | 18949  |     |        |                 |
| PRNP     | +Prnp, AAf  | prion protein (p27-30) (Creutzfeldt-Jakob disease, Gerstmann-Strausler-Scheinker syndrome, fatal familial insomnia) | 201300_s_  | Plasma M   | other        |       | 5621   |            | 19122  |     | 24686  |                 |
| RBMX     | hnRNP-G,    | RNA binding motif protein, X-linked                                                                                 | 225310_at  | Nucleus    | other        |       | 27316  |            | 19655  |     |        |                 |
| RFX5     | Rfx5 (pred  | regulatory factor X, 5 (influences HLA class II expression)                                                         | 202963_at  | Nucleus    | transcriptic |       | 5993   |            | 53970  |     | 310659 |                 |
| RFXAP    | 5730495K    | regulatory factor X-associated protein                                                                              | 229431_at  | Nucleus    | transcriptic |       | 5994   |            | 170767 |     |        |                 |
| RPS6KA5  | 3110005L1   | ribosomal protein S6 kinase, 90kDa, polypeptide 5                                                                   | 204633_s_  | Nucleus    | kinase       |       | 9252   |            | 73086  |     | 314384 |                 |
| SFPQ     | 1110004P2   | splicing factor proline/glutamine-rich (polypyrimidine tract binding protein associated)                            | 214016_s_  | Nucleus    | other        |       | 6421   |            | 71514  |     | 252855 |                 |
| SFRS12   | 8430401B    | splicing factor, arginine/serine-rich 12                                                                            | 212721_at  | Nucleus    | other        |       | 140890 |            | 218543 |     | 56763  |                 |
| SFRS6    | 1210001E    | splicing factor, arginine/serine-rich 6                                                                             | 208804_s_  | Nucleus    | other        |       | 6431   |            | 67996  |     | 362264 |                 |
| SFRS7    | 35kDa, 94f  | splicing factor, arginine/serine-rich 7, 35kDa                                                                      | 201129_at  | Nucleus    | other        |       | 6432   |            | 225027 |     | 362687 |                 |
| SNRPA1   | 1500015N    | small nuclear ribonucleoprotein polypeptide A1                                                                      | 206055_s_  | Nucleus    | other        |       | 6627   |            | 68981  |     | 292997 |                 |
| TCERG1   | 2410022J    | transcription elongation regulator 1                                                                                | 202396_at  | Nucleus    | transcriptic |       | 10915  |            | 56070  |     | 307474 |                 |
| ZRANB2   | A1227013,   | zinc finger, RAN-binding domain containing 2                                                                        | 223716_s_  | Nucleus    | transcriptic |       | 9406   |            | 53861  |     | 58821  |                 |
