# Supplementary material
Source: PubMed Central journal article supplement (PMC2014731)
Supplement: 07_065_Shanley_Suppl_Data2.pdf [file 07_065_Shanley_Suppl_Data2.pdf]

©2000-2006 Ingenuity Systems, Inc. All rights reserved.

| Name    | Synonyms    | Description                                                                                 |
|---------|-------------|---------------------------------------------------------------------------------------------|
| CD28    | CD28 ANT    | CD28 molecule                                                                               |
| CD247   | AW552088    | CD247 molecule                                                                              |
| CD3D    | CD3-DELT    | CD3d molecule, delta (CD3-TCR complex)                                                      |
| CD3E    | AI504783,   | CD3e molecule, epsilon (CD3-TCR complex)                                                    |
| CD3G    | CD3-GAM     | CD3g molecule, gamma (CD3-TCR complex)                                                      |
| CD8A    | BB154331    | CD8a molecule                                                                               |
| FYN     | AI448320,   | FYN oncogene related to SRC, FGR, YES                                                       |
| ITK     | EMT, Itk (p | IL2-inducible T-cell kinase                                                                 |
| LAT     | LAT1, MG    | linker for activation of T cells                                                            |
| LCK     | Hck-3, LC   | lymphocyte-specific protein tyrosine kinase                                                 |
| PPP3CC  | Calcineurin | protein phosphatase 3 (formerly 2B), catalytic subunit, gamma isoform (calcineurin A gamma) |
| PRKCQ   | A130035A    | protein kinase C, theta                                                                     |
| RASGRP1 | CALDAG-     | RAS guanyl releasing protein 1 (calcium and DAG-regulated)                                  |
| SHB     | BC028832    | Src homology 2 domain containing adaptor protein B                                          |
| TRA@    | C6.1A, FL   | T cell receptor alpha locus                                                                 |
| ZAP70   | 70kDa, AI   | zeta-chain (TCR) associated protein kinase 70kDa                                            |

| Affymetrix | Location    | Family | Drugs | Entrez    | Ger       | Entrez      | Ger | Entrez | Ger    | Entrez | Ger | Entrez | Ger |
|------------|-------------|--------|-------|-----------|-----------|-------------|-----|--------|--------|--------|-----|--------|-----|
| 206545_at  | 206545_at   | 1      | 1     | Plasma M  | other     |             |     | 940    | 12487  | 25660  |     |        |     |
| 210031_at  | 210031_at   | 1      | 1     | Plasma M  | transmemt | visilizumat |     | 919    | 12503  | 25300  |     |        |     |
| 213539_at  | 213539_at   | 1      | 1     | Plasma M  | transmemt | visilizumat |     | 915    | 12500  | 25710  |     |        |     |
| 205456_at  | 205456_at   | 1      | 1     | Plasma M  | transmemt | visilizumat |     | 916    | 12501  | 315609 |     |        |     |
| 206804_at  | 206804_at   | 1      | 1     | Plasma M  | transmemt | visilizumat |     | 917    | 12502  | 300678 |     |        |     |
| 205758_at  | 205758_at   | 1      | 8     | Plasma M  | other     |             |     | 925    | 12525  | 24930  |     |        |     |
| 212486_s   | 212486_s    | 1      | 1     | Plasma M  | kinase    | dasatinib   |     | 2534   | 14360  | 25150  |     |        |     |
| 211339_s   | 211339_s    | 1      | 1     | Cytoplasm | kinase    |             |     | 3702   | 16428  | 363577 |     |        |     |
| 211005_at  | 211005_at   | 1      | 1     | Plasma M  | other     |             |     | 27040  | 16797  | 81511  |     |        |     |
| 204890_s   | 204890_s    | 1, 4   | 1     | Cytoplasm | kinase    | dasatinib   |     | 3932   | 16818  | 313050 |     |        |     |
| 32541_at   | 207000_s_at |        |       | Unknown   | phosphata | ISAtx-247,  |     | 5533   | 19057  | 171378 |     |        |     |
| 210038_at  | 210039_s    | 1      | 2     | Cytoplasm | kinase    |             |     | 5588   | 18761  | 85420  |     |        |     |
| 205590_at  | 205590_at   | 10, 12 | 2     | Cytoplasm | other     |             |     | 10125  | 19419  | 29434  |     |        |     |
| --         | 225036_at   |        | 21    | Unknown   | other     |             |     | 6461   | 230126 | 362513 |     |        |     |
| 217143_s   | 217143_s    | 1      | 1     | Plasma M  | other     |             |     | 6955   | 21473  | 364379 |     |        |     |
| 214032_at  | 1555613_s   | 1      | 1     | Plasma M  | kinase    |             |     | 7535   | 22637  | 301348 |     |        |     |

Downregulated\_pathways

TAB 1-T cell receptor signaling Day 1

ie ID for Rat

©2000-2006 Ingenuity Systems, Inc. All rights reserved.

| Name     | Synonyms   | Description                                            | Affymetrix Location | Family    | Drugs | Entrez Gene | Entrez Gene         | Entrez Gene | Entrez Gene | Entrez Gene | Entrez Gene | Entrez Gene | Entrez Gene | Gene ID for Rat |
|----------|------------|--------------------------------------------------------|---------------------|-----------|-------|-------------|---------------------|-------------|-------------|-------------|-------------|-------------|-------------|-----------------|
| HLA-DMA  | CLASS II F | major histocompatibility complex, class II, DM alpha   | 217478_s_           | 217478_s_ | 2     | 11          | Plasma Mε transmemt |             |             |             | 3108        | 14998       | 294274      |                 |
| HLA-DMB  | AI385589,  | major histocompatibility complex, class II, DM beta    | 203932_at           | 203932_at | 2     | 3           | Plasma Mε transmemt |             |             |             | 3109        | 14999 150   | 294273      |                 |
| HLA-DOA  | H-2Oa, H2  | major histocompatibility complex, class II, DO alpha   | 226878_at           | 226878_at | 2     | 3           | Plasma Mε transmemt |             |             |             | 3111        | 15001       | 24984       |                 |
| HLA-DOB  | DOB, H-2f  | major histocompatibility complex, class II, DO beta    | 205671_s_           | 205671_s_ | 2     | 3           | Plasma Mε transmemt |             |             |             | 3112        | 15002       | 365542      |                 |
| HLA-DPA1 | HLA-DP1A   | major histocompatibility complex, class II, DP alpha 1 | 211991_s_           | 211991_s_ | 29    | 11          | Plasma Mε transmemt |             |             |             | 3113        |             | 24986       |                 |
| HLA-DPB1 | DPB1, HLf  | major histocompatibility complex, class II, DP beta 1  | 201137_s_           | 201137_s_ | 29    | 11          | Plasma Mε transmemt |             |             |             | 3115        |             |             |                 |
| HLA-DQA1 | AALPHA, f  | major histocompatibility complex, class II, DQ alpha 1 | 212671_s_           | 212671_s_ | 2     | 3           | Plasma Mε transmemt |             |             |             | 3117        | 14960       | 309621      |                 |
| HLA-DRA  | AI323765,  | major histocompatibility complex, class II, DR alpha   | 208894_at           | 208894_at | 2     | 11          | Plasma Mε transmemt |             |             |             | 3122        | 14968       | 294269      |                 |
| HLA-DRB1 | DR-7, DR-  | major histocompatibility complex, class II, DR beta 1  | 236203_at           | 215193_x_ | 2     | 3           | Plasma Mε transmemt |             |             |             | 3123        | 14969       | 294270      |                 |

©2000-2006 Ingenuity Systems, Inc. All rights reserved.

| Name      | Synonyms   | Description                                                            | Affymetrix | Location  | Family | Drugs | Entrez    | Ger       | Entrez      | Ger    | Entrez | Ger    | Entrez | Ger | Entrez | Gene ID for Rat |
|-----------|------------|------------------------------------------------------------------------|------------|-----------|--------|-------|-----------|-----------|-------------|--------|--------|--------|--------|-----|--------|-----------------|
| CD247     | AW552088   | CD247 molecule                                                         | 210031_at  | 210031_at | 1      | 1     | Plasma Mε | transmemt | visilizumab | 919    | 12503  | 25300  |        |     |        |                 |
| FYN       | AI448320,  | FYN oncogene related to SRC, FGR, YES                                  | 212486_s_  | 212486_s_ | 1      | 1     | Plasma Mε | kinase    | dasatinib   | 2534   | 14360  | 25150  |        |     |        |                 |
| KLRC2     | CD159a, C  | killer cell lectin-like receptor subfamily C, member 2                 | 206785_s_  | 206785_s_ | 21     | 4     | Plasma Mε | transmemt |             | 3822   | 16641  |        |        |     |        |                 |
| KLRC3     | NKG2-E     | killer cell lectin-like receptor subfamily C, member 3                 | 207723_s_  | 207723_s_ | 21     | 4     | Plasma Mε | transmemt |             | 3823   | 58179  |        |        |     |        |                 |
| KLRD1     | CD94       | killer cell lectin-like receptor subfamily D, member 1                 | 207795_s_  | 207795_s_ | 21     | 4     | Plasma Mε | transmemt |             | 3824   | 16643  | 25110  |        |     |        |                 |
| KLRK1     | CD314, D1  | killer cell lectin-like receptor subfamily K, member 1                 | 205821_at  | 205821_at | 21     | 4     | Plasma Mε | transmemt |             | 22914  | 27007  | 24934  |        |     |        |                 |
| LAT       | LAT1, MG   | linker for activation of T cells                                       | 211005_at  | 211005_at | 1      | 1     | Plasma Mε | other     |             | 27040  | 16797  | 81511  |        |     |        |                 |
| LCK       | Hck-3, LCK | lymphocyte-specific protein tyrosine kinase                            | 204890_s_  | 204890_s_ | 1, 4   | 1     | Cytoplasm | kinase    | dasatinib   | 3932   | 16818  | 313050 |        |     |        |                 |
| RRAS2     | 2610016H,  | related RAS viral (r-ras) oncogene homolog 2                           | 212590_at  | 212590_at | 10     | 2     | Plasma Mε | enzyme    |             | 22800  | 66922  | 365355 |        |     |        |                 |
| SH2D1A (i | DSHP, EB   | SH2 domain protein 1A, Duncan's disease (lymphoproliferative syndrome) | 210116_at  | 210116_at | 4      | 6     | Cytoplasm | other     |             | 4068   | 20400  | 501502 |        |     |        |                 |
| SH2D1B    | EAT-2, EA  | SH2 domain containing 1B                                               | 1553177_ε  | 1553177_ε | 4      | 6     | Unknown   | other     |             | 117157 | 26904  | 501869 |        |     |        |                 |
| ZAP70     | 70kDa, AIZ | zeta-chain (TCR) associated protein kinase 70kDa                       | 214032_at  | 1555613_ε | 1      | 1     | Plasma Mε | kinase    |             | 7535   | 22637  | 301348 |        |     |        |                 |
