# Supplementary material
Source: PubMed Central journal article supplement (PMC2014731)
Supplement: 07_065_Shanley_Suppl_Data3.pdf [file 07_065_Shanley_Suppl_Data3.pdf]

©2000-2006 Ingenuity Systems, Inc. All rights reserved.

| Name       | Synonyms    | Description                                                                          | Affymetrix | Location   | Family       | Drugs     | Entrez | Ger | Entrez | Ger | Entrez | Gene ID for Rat |
|------------|-------------|--------------------------------------------------------------------------------------|------------|------------|--------------|-----------|--------|-----|--------|-----|--------|-----------------|
| ALOX5      | 5 LIPOXYC   | arachidonate 5-lipoxygenase                                                          | 204446_s_  | Cytoplasm  | enzyme       | TA 270, m | 240    |     | 11689  |     | 25290  |                 |
| ALOX5AP    | FLAP        | arachidonate 5-lipoxygenase-activating protein                                       | 204174_at  | Plasma M   | other        |           | 241    |     | 11690  |     | 29624  |                 |
| C1RL       | C1r-LP, C1  | complement component 1, r subcomponent-like                                          | 218983_at  | Unknown    | peptidase    |           | 51279  |     | 232371 |     | 408246 |                 |
| CD163      | Cd163 (pre  | CD163 molecule                                                                       | 216233_at  | Plasma M   | transmemt    |           | 9332   |     | 93671  |     | 312701 |                 |
| CEBPB      | Agp/eb, C/  | CCAAT/enhancer binding protein (C/EBP), beta                                         | 212501_at  | Nucleus    | transcriptic |           | 1051   |     | 12608  |     | 24253  |                 |
| CLEC4E     | C type lect | C-type lectin domain family 4, member E                                              | 222934_s_  | Unknown    | other        |           | 26253  |     | 56619  |     | 450223 |                 |
| DEFA1 (inc | DEF1, DEI   | defensin, alpha 1                                                                    | 205033_s_  | Extracellu | other        |           | 1667   |     |        |     |        |                 |
| DICER1     | 1110006FC   | Dicer1, Dcr-1 homolog (Drosophila)                                                   | 206061_s_  | Cytoplasm  | enzyme       |           | 23405  |     | 192119 |     | 299284 |                 |
| EIF4G3     | 4833436O    | eukaryotic translation initiation factor 4 gamma, 3                                  | 243149_at  | Cytoplasm  | translation  |           | 8672   |     | 230861 |     | 298573 |                 |
| ENTPD1     | 2610206B    | ectonucleoside triphosphate diphosphohydrolase 1                                     | 209474_s_  | Plasma M   | enzyme       |           | 953    |     | 12495  |     | 64519  |                 |
| FOSL2      | FLJ23306,   | FOS-like antigen 2                                                                   | 241824_at  | Nucleus    | transcriptic |           | 2355   |     | 14284  |     | 25446  |                 |
| HP         | Ba1-647, h  | haptoglobin                                                                          | 206697_s_  | Extracellu | peptidase    |           | 3240   |     | 15439  |     | 24464  |                 |
| HSPA1A     | 70kDa, he   | heat shock 70kDa protein 1A                                                          | 200799_at  | Cytoplasm  | other        |           | 3303   |     | 193740 |     | 294254 |                 |
| IL1R1      | CD121A, C   | interleukin 1 receptor, type I                                                       | 202948_at  | Plasma M   | transmemt    | anakinra  | 3554   |     | 16177  |     | 25663  |                 |
| IL1R2      | CD121b, C   | interleukin 1 receptor, type II                                                      | 205403_at  | Plasma M   | transmemt    |           | 7850   |     | 16178  |     | 117022 |                 |
| IL1RN      | F630041P    | interleukin 1 receptor antagonist                                                    | 212659_s_  | Extracellu | cytokine     |           | 3557   |     | 16181  |     | 60582  |                 |
| JDP2       | JUNDM2,     | jun dimerization protein 2                                                           | 226267_at  | Nucleus    | transcriptic |           | 122953 |     | 81703  |     | 116674 |                 |
| LCN2       | 24P3, AW2   | lipocalin 2 (oncogene 24p3)                                                          | 212531_at  | Extracellu | transporter  |           | 3934   |     | 16819  |     | 170496 |                 |
| LDLR       | FH, FHC, l  | low density lipoprotein receptor (familial hypercholesterolemia)                     | 202068_s_  | Plasma M   | transporter  |           | 3949   |     | 16835  |     | 300438 |                 |
| LTB4R      | BLT, BLT1,  | leukotriene B4 receptor                                                              | 210128_s_  | Plasma M   | G-protein c  | etalocib  | 1241   |     | 16995  |     | 59264  |                 |
| LY96       | ESOP-1, M   | lymphocyte antigen 96                                                                | 206584_at  | Plasma M   | other        |           | 23643  |     | 17087  |     | 448830 |                 |
| MAP2K6     | MAPK KIN    | mitogen-activated protein kinase 6                                                   | 205698_s_  | Cytoplasm  | kinase       |           | 5608   |     | 26399  |     | 114495 |                 |
| MAPK14     | CRK1, CSI   | mitogen-activated protein kinase 14                                                  | 202530_at  | Cytoplasm  | kinase       | SCIO-469  | 1432   |     | 26416  |     | 81649  |                 |
| MAPKAPK    | AA960234    | mitogen-activated protein kinase-activated protein kinase 2                          | 201461_s_  | Nucleus    | kinase       |           | 9261   |     | 17164  |     | 289014 |                 |
| MEF2A      | A430079H    | MADS box transcription enhancer factor 2, polypeptide A (myocyte enhancer factor 2A) | 208328_s_  | Nucleus    | transcriptic |           | 4205   |     | 17258  |     | 365630 |                 |
| MKNK1      | 2410048M    | MAP kinase interacting serine/threonine kinase 1                                     | 1560720_s_ | Cytoplasm  | kinase       |           | 8569   |     | 17346  |     |        |                 |
| ORM1       | AGP, Agp-   | orosomuroid 1                                                                        | 205041_s_  | Extracellu | other        |           | 5004   |     | 18406  |     |        |                 |
| RETN       | ADSF, FIZ   | resistin                                                                             | 220570_at  | Extracellu | other        |           | 56729  |     | 57264  |     | 246250 |                 |
| RGR (inclu | MGC11967    | Ral-GDS related protein Rgr                                                          | 235816_s_  | Unknown    | other        |           | 266747 |     |        |     |        |                 |
| SQRDL      | 0610039J1   | sulfide quinone reductase-like (yeast)                                               | 217995_at  | Cytoplasm  | enzyme       |           | 58472  |     | 59010  |     |        |                 |
| TAK1       | 2810468K    | TAO kinase 1                                                                         | 227454_at  | Cytoplasm  | kinase       |           | 57551  |     | 216965 |     | 286993 |                 |
| TLR2       | CD282, Ly   | toll-like receptor 2                                                                 | 204924_at  | Plasma M   | transmemt    |           | 7097   |     | 24088  |     | 310553 |                 |
| TLR4       | CD284, H1   | toll-like receptor 4                                                                 | 232068_s_  | Plasma M   | transmemt    | TAK-242   | 7099   |     | 21898  |     | 29260  |                 |
| UPP1       | A1325217,   | uridine phosphorylase 1                                                              | 203234_at  | Cytoplasm  | enzyme       |           | 7378   |     | 22271  |     | 289801 |                 |
| ZAK        | AV006891,   | sterile alpha motif and leucine zipper containing kinase AZK                         | 225662_at  | Cytoplasm  | kinase       |           | 51776  |     | 65964  |     |        |                 |

Upregulated\_networks

TAB 1-MAPK14 network day 1

©2000-2006 Ingenuity Systems, Inc. All rights reserved.

| Name     | Synonyms    | Description                                                                         | Affymetrix | Location   | Family       | Drugs        | Entrez Ger | Entrez Ger | Entrez Ger    | Gene ID for Rat |
|----------|-------------|-------------------------------------------------------------------------------------|------------|------------|--------------|--------------|------------|------------|---------------|-----------------|
| BMX      | ETK, Etk/E  | BMX non-receptor tyrosine kinase                                                    | 206464_at  | Cytoplasm  | kinase       |              | 660        | 12169      | 367786        |                 |
| CD14     | CD14 ANT    | CD14 molecule                                                                       | 201743_at  | Plasma M   | transmemt    |              | 929        | 12475      | 60350         |                 |
| CEBPA    | C/EBP ALF   | CCAAT/enhancer binding protein (C/EBP), alpha                                       | 204039_at  | Nucleus    | transcriptic |              | 1050       | 12606      | 24252         |                 |
| CEBPD    | C/EBP DE    | CCAAT/enhancer binding protein (C/EBP), delta                                       | 203973_s_  | Nucleus    | transcriptic |              | 1052       | 12609      | 25695         |                 |
| CSF2RA   | CD116, CI   | colony stimulating factor 2 receptor, alpha, low-affinity (granulocyte-macrophage)  | 207085_x_  | Plasma M   | transmemt    | sargramos    | 1438       | 12982      |               |                 |
| CSF3R    | CD114, Cs   | colony stimulating factor 3 receptor (granulocyte)                                  | 1553297_ε  | Plasma M   | transmemt    | pegfilgrasti | 1441       | 12986      | 298518        |                 |
| CUTL1    | AA407197    | cut-like 1, CCAAT displacement protein (Drosophila)                                 | 225937_at  | Nucleus    | transcriptic |              | 1523       | 13047      | 116639        |                 |
| ELA2     | Ela2 (predi | elastase 2, neutrophil                                                              | 206871_at  | Extracellu | peptidase    | proteinase   | 1991       | 50701      | 299606        |                 |
| EMR1     | DD7A5-7,    | egf-like module containing, mucin-like, hormone receptor-like 1                     | 207111_at  | Plasma M   | G-protein c  |              | 2015       | 13733      | 316137        |                 |
| FCAR     | CD89, RG    | Fc fragment of IgA, receptor for                                                    | 211307_s_  | Plasma M   | other        |              | 2204       |            | 365183        |                 |
| FCER1G   | Al573376,   | Fc fragment of IgE, high affinity I, receptor for; gamma polypeptide                | 204232_at  | Plasma M   | transmemt    |              | 2207       | 14127      | 25441         |                 |
| FCGR1A   | Al323638,   | Fc fragment of IgG, high affinity Ia, receptor (CD64)                               | 216950_s_  | Plasma M   | transmemt    |              | 2209       | 14129      | 295279        |                 |
| FES      | Al586313,   | feline sarcoma oncogene                                                             | 205418_at  | Cytoplasm  | kinase       |              | 2242       | 14159      | 361597        |                 |
| FFAR2    | FFA2R, Gf   | free fatty acid receptor 2                                                          | 221345_at  | Plasma M   | G-protein c  |              | 2867       | 233079     | 292794        |                 |
| FGR      | C-FGR, FC   | Gardner-Rasheed feline sarcoma viral (v-fgr) oncogene homolog                       | 208438_s_  | Nucleus    | kinase       |              | 2268       | 14191      | 79113         |                 |
| HCK      | Al849071,   | hemopoietic cell kinase                                                             | 208018_s_  | Cytoplasm  | kinase       |              | 3055       | 15162      | 25734         |                 |
| IFNGR1   | CD119, FL   | interferon gamma receptor 1                                                         | 211676_s_  | Plasma M   | transmemt    | interferon γ | 3459       | 15979      | 116465        |                 |
| IL10RB   | 6620401D    | interleukin 10 receptor, beta                                                       | 230632_at  | Plasma M   | transmemt    |              | 3588       | 16155      | 304091        |                 |
| IL18R1   | CDw218a,    | interleukin 18 receptor 1                                                           | 206618_at  | Plasma M   | transmemt    |              | 8809       | 16182      | 301365        |                 |
| IL18RAP  | ACPL, CD    | interleukin 18 receptor accessory protein                                           | 207072_at  | Plasma M   | transmemt    |              | 8807       | 16174      | 301366 373540 |                 |
| ITGAM    | C3 receptc  | integrin, alpha M (complement component 3 receptor 3 subunit)                       | 205786_s_  | Plasma M   | other        |              | 3684       | 16409      | 25021         |                 |
| KPNA4    | 1110058D    | karyopherin alpha 4 (importin alpha 3)                                              | 209653_at  | Nucleus    | transporter  |              | 3840       | 16649      | 361959        |                 |
| LTF      | GIG12, HL   | lactotransferrin                                                                    | 202018_s_  | Extracellu | peptidase    |              | 4057       | 17002      | 301034        |                 |
| MMP8     | BB138268    | matrix metalloproteinase 8 (neutrophil collagenase)                                 | 207329_at  | Extracellu | peptidase    |              | 4317       | 17394      | 63849         |                 |
| MPO      | KIAA4033,   | myeloperoxidase                                                                     | 203948_s_  | Cytoplasm  | enzyme       |              | 4353       | 17523      | 303413        |                 |
| PRTN3    | ACPA, AG    | proteinase 3 (serine proteinase, neutrophil, Wegener granulomatosis autoantigen)    | 207341_at  | Extracellu | peptidase    |              | 5657       | 19152      | 314615        |                 |
| S100A9   | 60B8AG, A   | S100 calcium binding protein A9 (calgranulin B)                                     | 203535_at  | Cytoplasm  | other        |              | 6280       | 20202      | 94195         |                 |
| SERPINA1 | A1-PI, A1A  | serpin peptidase inhibitor, clade A (alpha-1 antiproteinase, antitrypsin), member 1 | 211429_s_  | Extracellu | other        |              | 5265       | 20700 2070 | 24648         |                 |
| SERPINB1 | 1190005M    | serpin peptidase inhibitor, clade B (ovalbumin), member 1                           | 212268_at  | Cytoplasm  | other        |              | 1992       | 66222      | 291091        |                 |
| SLPI     | ALK1, ALP   | secretory leukocyte peptidase inhibitor                                             | 203021_at  | Cytoplasm  | other        |              | 6590       | 20568      | 84386         |                 |
| SOCS3    | ATOD4, CI   | suppressor of cytokine signaling 3                                                  | 227697_at  | Cytoplasm  | other        |              | 9021       | 12702      | 89829         |                 |
| SOS2     | mSos1, Sc   | son of sevenless homolog 2 (Drosophila)                                             | 217644_s_  | Cytoplasm  | other        |              | 6655       | 20663      | 85384         |                 |
| SPI1     | Dis-1, OF,  | spleen focus forming virus (SFFV) proviral integration oncogene spi1                | 205312_at  | Nucleus    | transcriptic |              | 6688       | 20375      | 366126        |                 |
| STAT3    | 1110034C    | signal transducer and activator of transcription 3 (acute-phase response factor)    | 208992_s_  | Nucleus    | transcriptic |              | 6774       | 20848      | 25125         |                 |
| TGFA     | RATTGFA,    | transforming growth factor, alpha                                                   | 205016_at  | Extracellu | growth fac   |              | 7039       | 21802      | 24827         |                 |

©2000-2006 Ingenuity Systems, Inc. All rights reserved.

| Name       | Synonyms    | Description                                                                       | Affymetrix | Location   | Family       | Drugs       | Entrez | Ger   | Entrez | Ger   | Entrez | Gene ID for Rat |
|------------|-------------|-----------------------------------------------------------------------------------|------------|------------|--------------|-------------|--------|-------|--------|-------|--------|-----------------|
| ACOX1      | ACO, ACO    | acyl-Coenzyme A oxidase 1, palmitoyl                                              | 209600_s_  | Cytoplasm  | enzyme       |             | 51     |       | 11430  |       | 50681  |                 |
| AP2B1      | 13000120    | adaptor-related protein complex 2, beta 1 subunit                                 | 200615_s_  | Cytoplasm  | transporter  |             | 163    |       | 71770  |       | 140670 |                 |
| BCL2A1     | A1, A1-b, A | BCL2-related protein A1                                                           | 205681_at  | Cytoplasm  | other        |             | 597    | 12044 | 1204   |       | 170929 |                 |
| C5AR1      | C5a, C5A    | complement component 5a receptor 1                                                | 220088_at  | Plasma M   | G-protein c  |             | 728    |       | 12273  |       | 113959 |                 |
| CAMP       | CAP18, Cr   | cathelicidin antimicrobial peptide                                                | 210244_at  | Cytoplasm  | other        |             | 820    |       | 12796  |       | 316010 |                 |
| CD36       | CD36 Anti   | CD36 molecule (thrombospondin receptor)                                           | 242197_x_  | Plasma M   | other        |             | 948    |       | 12491  | 29184 | 499985 |                 |
| CD55       | CR, DAF, I  | CD55 molecule, decay accelerating factor for complement (Cromer blood group)      | 201926_s_  | Plasma M   | other        |             | 1604   |       | 13136  |       | 64036  |                 |
| CD59       | 16.3A5, A   | CD59 molecule, complement regulatory protein                                      | 200985_s_  | Plasma M   | other        |             | 966    |       | 333883 |       | 25407  |                 |
| CD63       | C75951, L   | CD63 molecule                                                                     | 200663_at  | Plasma M   | other        |             | 967    |       | 12512  |       | 29186  |                 |
| CFLAR      | C-FLIP, c-f | CASP8 and FADD-like apoptosis regulator                                           | 211316_x_  | Cytoplasm  | other        |             | 8837   |       | 12633  |       | 117279 |                 |
| CTSG       | CAT G, CA   | cathepsin G                                                                       | 205653_at  | Cytoplasm  | peptidase    |             | 1511   |       | 13035  |       | 290257 |                 |
| CYBB       | C88302, C   | cytochrome b-245, beta polypeptide (chronic granulomatous disease)                | 203922_s_  | Cytoplasm  | enzyme       |             | 1536   |       | 13058  |       | 66021  |                 |
| DDEF1      | AMAP1, A    | development and differentiation enhancing factor 1                                | 221039_s_  | Plasma M   | other        |             | 50807  |       | 13196  |       | 314961 |                 |
| ELF2       | 2610036A    | E74-like factor 2 (ets domain transcription factor)                               | 243469_at  | Nucleus    | transcriptic |             | 1998   |       | 69257  |       | 361944 |                 |
| F5         | Ac2-120, A  | coagulation factor V (proaccelerin, labile factor)                                | 204713_s_  | Plasma M   | other        | drotrecogir | 2153   |       | 14067  |       | 304929 |                 |
| FPR1       | fMLF-R, FI  | formyl peptide receptor 1                                                         | 205119_s_  | Plasma M   | G-protein c  |             | 2357   |       | 14293  |       | 292409 |                 |
| FPRL1 (inc | ALXR, E3    | formyl peptide receptor-like 1                                                    | 210772_at  | Plasma M   | G-protein c  |             | 2358   |       | 14289  |       | 292413 |                 |
| GAB2       | A1463667,   | GRB2-associated binding protein 2                                                 | 238405_at  | Cytoplasm  | other        |             | 9846   |       | 14389  |       | 84477  |                 |
| GBA        | GBA1, GC    | glucosidase, beta; acid (includes glucosylceramidase)                             | 210589_s_  | Cytoplasm  | enzyme       |             | 2629   |       | 14466  |       |        |                 |
| GRB10      | 5730571D    | growth factor receptor-bound protein 10                                           | 209409_at  | Plasma M   | other        |             | 2887   |       | 14783  |       | 498416 |                 |
| HGF        | C230052L    | hepatocyte growth factor (hepapoietin A; scatter factor)                          | 209960_at  | Extracellu | growth fac   |             | 3082   |       | 15234  |       | 24446  |                 |
| JAK2       | A1504024,   | Janus kinase 2 (a protein tyrosine kinase)                                        | 1562031_ε  | Cytoplasm  | kinase       |             | 3717   |       | 16452  |       | 24514  |                 |
| LYN        | AA407514    | v-yes-1 Yamaguchi sarcoma viral related oncogene homolog                          | 202626_s_  | Cytoplasm  | kinase       |             | 4067   |       | 17096  |       | 81515  |                 |
| MERTK      | C-MER, E    | c-mer proto-oncogene tyrosine kinase                                              | 206028_s_  | Plasma M   | kinase       |             | 10461  |       | 17289  |       | 65037  |                 |
| NCF4       | A1451400,   | neutrophil cytosolic factor 4, 40kDa                                              | 205147_x_  | Cytoplasm  | enzyme       |             | 4689   |       | 17972  |       | 366956 |                 |
| NUMB       | B2 elemen   | numb homolog (Drosophila)                                                         | 236930_at  | Plasma M   | other        |             | 8650   |       | 18222  |       | 29419  |                 |
| PICALM     | AP180, CA   | phosphatidylinositol binding clathrin assembly protein                            | 239274_at  | Cytoplasm  | other        |             | 8301   |       | 233489 |       | 89816  |                 |
| PRKCD      | A1385711,   | protein kinase C, delta                                                           | 202545_at  | Cytoplasm  | kinase       |             | 5580   |       | 18753  |       | 170538 |                 |
| PTPRC      | B220, CD4   | protein tyrosine phosphatase, receptor type, C                                    | 1569830_ε  | Plasma M   | phosphata    |             | 5788   |       | 19264  |       | 24699  |                 |
| RALB       | 5730472O    | v-ral simian leukemia viral oncogene homolog B (ras related; GTP binding protein) | 202101_s_  | Cytoplasm  | enzyme       |             | 5899   |       | 64143  |       | 116546 |                 |
| SIRPA      | A1835480,   | signal-regulatory protein alpha                                                   | 202897_at  | Plasma M   | phosphata    |             | 140885 |       | 19261  |       | 25528  |                 |
| STAT5B     | STAT5       | signal transducer and activator of transcription 5B                               | 205026_at  | Nucleus    | transcriptic |             | 6777   |       | 20851  |       | 25126  |                 |
| THBS1      | tbsp1, THE  | thrombospondin 1                                                                  | 201110_s_  | Extracellu | other        |             | 7057   |       | 21825  |       | 445442 |                 |
| TNFAIP6    | TNFIP6, T   | tumor necrosis factor, alpha-induced protein 6                                    | 206026_s_  | Extracellu | other        |             | 7130   |       | 21930  |       | 84397  |                 |
| TXN        | ADF, AW5    | thioredoxin                                                                       | 216609_at  | Cytoplasm  | enzyme       |             | 7295   |       | 22166  |       | 116484 |                 |

©2000-2006 Ingenuity Systems, Inc. All rights reserved.

| Name    | Synonyms    | Description                                                                        | Affymetrix | Location   | Family       | Drugs        | Entrez Ger | Entrez Ger | Entrez Gene   | Gene ID for Rat |
|---------|-------------|------------------------------------------------------------------------------------|------------|------------|--------------|--------------|------------|------------|---------------|-----------------|
| ACTR2   | 4921510D    | ARP2 actin-related protein 2 homolog (yeast)                                       | 1558015_s  | Plasma M   | other        |              | 10097      | 66713      | 289820        |                 |
| ANKS1A  | ANKS1, Ar   | ankyrin repeat and sterile alpha motif domain containing 1A                        | 236781_at  | Cytoplasr  | other        |              | 23294      | 224650     | 309639        |                 |
| ARPC4   | 20kDa, 53   | actin related protein 2/3 complex, subunit 4, 20kDa                                | 211672_s   | Unknown    | other        |              | 10093      | 68089      | 297518        |                 |
| ARPC5   | 165kDa, 5   | actin related protein 2/3 complex, subunit 5, 16kDa                                | 237387_at  | Cytoplasr  | other        |              | 10092      | 67771      | 360854        |                 |
| ASPH    | 2310005F    | aspartate beta-hydroxylase                                                         | 210896_s   | Cytoplasr  | enzyme       |              | 444        | 65973      | 312981        |                 |
| BCL3    | Al528691,   | B-cell CLL/lymphoma 3                                                              | 204908_s   | Nucleus    | transcriptic |              | 602        | 12051      |               |                 |
| C5AR1   | C5a, C5a    | complement component 5a receptor 1                                                 | 220088_at  | Plasma M   | G-protein c  |              | 728        | 12273      | 113959        |                 |
| CAMP    | CAP18, Cr   | cathelicidin antimicrobial peptide                                                 | 210244_at  | Cytoplasr  | other        |              | 820        | 12796      | 316010        |                 |
| CEBPA   | C/EBP ALF   | CCAAT/enhancer binding protein (C/EBP), alpha                                      | 204039_at  | Nucleus    | transcriptic |              | 1050       | 12606      | 24252         |                 |
| CSF2RA  | CD116, CI   | colony stimulating factor 2 receptor, alpha, low-affinity (granulocyte-macrophage) | 210340_s   | Plasma M   | transmemt    | sargramos    | 1438       | 12982      |               |                 |
| CSF3R   | CD114, Cs   | colony stimulating factor 3 receptor (granulocyte)                                 | 1553297_ε  | Plasma M   | transmemt    | pegfilgrasti | 1441       | 12986      | 298518        |                 |
| CUGBP2  | B230345P    | CUG triplet repeat, RNA binding protein 2                                          | 234151_at  | Unknown    | other        |              | 10659      | 14007      | 29428         |                 |
| DACH1   | Al182278,   | dachshund homolog 1 (Drosophila)                                                   | 205472_s   | Nucleus    | transcriptic |              | 1602       | 13134      |               |                 |
| ENO1    | 0610008I1   | enolase 1, (alpha)                                                                 | 217294_s   | Cytoplasr  | transcriptic |              | 2023       | 13806      | 24333         |                 |
| ENTPD1  | 2610206B    | ectonucleoside triphosphate diphosphohydrolase 1                                   | 239701_at  | Plasma M   | enzyme       |              | 953        | 12495      | 64519         |                 |
| FCGR1A  | Al323638,   | Fc fragment of IgG, high affinity Ia, receptor (CD64)                              | 216950_s   | Plasma M   | transmemt    |              | 2209       | 14129      | 295279        |                 |
| FOS     | C-FOS, D1   | v-fos FBJ murine osteosarcoma viral oncogene homolog                               | 209189_at  | Nucleus    | transcriptic |              | 2353       | 14281      | 314322        |                 |
| G6PD    | G28A, G6f   | glucose-6-phosphate dehydrogenase                                                  | 202275_at  | Cytoplasr  | enzyme       |              | 2539       | 14381      | 24377         |                 |
| GCLM    | Gamma gc    | glutamate-cysteine ligase, modifier subunit                                        | 203925_at  | Cytoplasr  | enzyme       |              | 2730       | 14630      | 29739         |                 |
| IL18R1  | CDw218a,    | interleukin 18 receptor 1                                                          | 206618_at  | Plasma M   | transmemt    |              | 8809       | 16182      | 301365        |                 |
| IL18RAP | ACPL, CD    | interleukin 18 receptor accessory protein                                          | 207072_at  | Plasma M   | transmemt    |              | 8807       | 16174      | 301366 373540 |                 |
| IL1A    | IL-1, IL1-A | interleukin 1, alpha                                                               | 208200_at  | Extracellu | cytokine     | IL-1 Trap    | 3552       | 16175      | 24493         |                 |
| IL1R1   | CD121A, C   | interleukin 1 receptor, type I                                                     | 202948_at  | Plasma M   | transmemt    | anakinra     | 3554       | 16177      | 25663         |                 |
| IL1R2   | CD121b, C   | interleukin 1 receptor, type II                                                    | 205403_at  | Plasma M   | transmemt    |              | 7850       | 16178      | 117022        |                 |
| IL1RN   | F630041P    | interleukin 1 receptor antagonist                                                  | 216243_s   | Extracellu | cytokine     |              | 3557       | 16181      | 60582         |                 |
| ITGAM   | C3 receptc  | integrin, alpha M (complement component 3 receptor 3 subunit)                      | 205786_s   | Plasma M   | other        |              | 3684       | 16409      | 25021         |                 |
| LAMP2   | CD107B, L   | lysosomal-associated membrane protein 2                                            | 203041_s   | Plasma M   | enzyme       |              | 3920       | 16784      | 24944         |                 |
| LTF     | GIG12, HL   | lactotransferrin                                                                   | 202018_s   | Extracellu | peptidase    |              | 4057       | 17002      | 301034        |                 |
| MPO     | KIAA4033,   | myeloperoxidase                                                                    | 203948_s   | Cytoplasr  | enzyme       |              | 4353       | 17523      | 303413        |                 |
| NFKBIZ  | Aa408868,   | nuclear factor of kappa light polypeptide gene enhancer in B-cells inhibitor, zeta | 223217_s   | Nucleus    | transcriptic |              | 64332      | 80859      | 304005        |                 |
| ORM1    | AGP, Agp-;  | orosomucoid 1                                                                      | 205040_at  | Extracellu | other        |              | 5004       | 18406      |               |                 |
| PCNX    | 2900024E;   | pecanex homolog (Drosophila)                                                       | 213159_at  | Unknown    | other        |              | 22990      | 54604      | 314288        |                 |
| S100A8  | 60B8AG, A   | S100 calcium binding protein A8 (calgranulin A)                                    | 202917_s   | Cytoplasr  | other        |              | 6279       | 20201      | 116547        |                 |
| S100A9  | 60B8AG, A   | S100 calcium binding protein A9 (calgranulin B)                                    | 203535_at  | Cytoplasr  | other        |              | 6280       | 20202      | 94195         |                 |
| SMA5    |             | SMA5                                                                               | 215043_s   | Unknown    | other        |              | 11042      |            |               |                 |

©2000-2006 Ingenuity Systems, Inc. All rights reserved.

| Name       | Synonyms    | Description                                                                         | Affymetrix | Location   | Family       | Drugs       | Entrez | Ger | Entrez     | Ger | Entrez       | Gene ID for Rat |
|------------|-------------|-------------------------------------------------------------------------------------|------------|------------|--------------|-------------|--------|-----|------------|-----|--------------|-----------------|
| CD14       | CD14 ANT    | CD14 molecule                                                                       | 201743_at  | Plasma M   | transmemt    |             | 929    |     | 12475      |     | 60350        |                 |
| CD36       | CD36 Antiq  | CD36 molecule (thrombospondin receptor)                                             | 242197_x_  | Plasma M   | other        |             | 948    |     | 12491      |     | 29184 499985 |                 |
| CTSB       | APPS, CA    | cathepsin B                                                                         | 213275_x_  | Cytoplasr  | peptidase    |             | 1508   |     | 13030      |     | 64529        |                 |
| CTSG       | CAT G, CA   | cathepsin G                                                                         | 205653_at  | Cytoplasr  | peptidase    |             | 1511   |     | 13035      |     | 290257       |                 |
| ELA2       | Ela2 (predi | elastase 2, neutrophil                                                              | 206871_at  | Extracellu | peptidase    | proteinase  | 1991   |     | 50701      |     | 299606       |                 |
| F5         | Ac2-120, A  | coagulation factor V (proaccelerin, labile factor)                                  | 204713_s_  | Plasma M   | other        | drotrecogir | 2153   |     | 14067      |     | 304929       |                 |
| FCER1G     | A1573376,   | Fc fragment of IgE, high affinity I, receptor for; gamma polypeptide                | 1554899_s_ | Plasma M   | transmemt    |             | 2207   |     | 14127      |     | 25441        |                 |
| FCGR2A     | CD16, CD    | Fc fragment of IgG, low affinity IIa, receptor (CD32)                               | 1565674_s_ | Plasma M   | transmemt    |             | 2212   |     | 14131      |     | 116591       |                 |
| FES        | A1586313,   | feline sarcoma oncogene                                                             | 205418_at  | Cytoplasr  | kinase       |             | 2242   |     | 14159      |     | 361597       |                 |
| FOSL2      | FLJ23306,   | FOS-like antigen 2                                                                  | 218880_at  | Nucleus    | transcriptic |             | 2355   |     | 14284      |     | 25446        |                 |
| FPR1       | fMLF-R, FI  | formyl peptide receptor 1                                                           | 205119_s_  | Plasma M   | G-protein c  |             | 2357   |     | 14293      |     | 292409       |                 |
| GRN        | acroganin   | granulin                                                                            | 200678_x_  | Extracellu | growth faci  |             | 2896   |     | 14824      |     | 29143        |                 |
| HK3        | HKIII, HKX  | hexokinase 3 (white cell)                                                           | 205936_s_  | Cytoplasr  | kinase       |             | 3101   |     | 212032     |     | 25060        |                 |
| HP         | Ba1-647, h  | haptoglobin                                                                         | 208470_s_  | Extracellu | peptidase    |             | 3240   |     | 15439      |     | 24464        |                 |
| IQGAP1 (ii | AA682088    | IQ motif containing GTPase activating protein 1                                     | 213446_s_  | Cytoplasr  | other        |             | 8826   |     | 29875      |     | 361598       |                 |
| LCN2       | 24P3, AW2   | lipocalin 2 (oncogene 24p3)                                                         | 212531_at  | Extracellu | transporter  |             | 3934   |     | 16819      |     | 170496       |                 |
| LY96       | ESOP-1, M   | lymphocyte antigen 96                                                               | 206584_at  | Plasma M   | other        |             | 23643  |     | 17087      |     | 448830       |                 |
| MAPK1      | 9030612K    | mitogen-activated protein kinase 1                                                  | 242106_at  | Cytoplasr  | kinase       |             | 5594   |     | 26413      |     | 116590       |                 |
| MAPK14     | CRK1, CSI   | mitogen-activated protein kinase 14                                                 | 210449_x_  | Cytoplasr  | kinase       | SCIO-469    | 1432   |     | 26416      |     | 81649        |                 |
| MARCKS     | 80K-L, FLJ  | myristoylated alanine-rich protein kinase C substrate                               | 201668_x_  | Plasma M   | other        |             | 4082   |     | 17118      |     | 25603        |                 |
| MKNK1      | 2410048M    | MAP kinase interacting serine/threonine kinase 1                                    | 243256_at  | Cytoplasr  | kinase       |             | 8569   |     | 17346      |     |              |                 |
| PI3        | 9230106L1   | peptidase inhibitor 3, skin-derived (SKALP)                                         | 41469_at   | Extracellu | other        |             | 5266   |     | 192201     |     | 408230       |                 |
| PRTN3      | ACPA, AGI   | proteinase 3 (serine proteinase, neutrophil, Wegener granulomatosis autoantigen)    | 207341_at  | Extracellu | peptidase    |             | 5657   |     | 19152      |     | 314615       |                 |
| RAP1GAP    | 1300019I1   | RAP1 GTPase activating protein                                                      | 203911_at  | Cytoplasr  | other        |             | 5909   |     | 110351     |     | 313644       |                 |
| RGR (inclu | MGC1196i    | Ral-GDS related protein Rgr                                                         | 235816_s_  | Unknown    | other        |             | 266747 |     |            |     |              |                 |
| SERPINA1   | A1-PI, A1A  | serpin peptidase inhibitor, clade A (alpha-1 antiproteinase, antitrypsin), member 1 | 202833_s_  | Extracellu | other        |             | 5265   |     | 20700 2070 |     | 24648        |                 |
| SERPINB1   | 1190005M    | serpin peptidase inhibitor, clade B (ovalbumin), member 1                           | 212268_at  | Cytoplasr  | other        |             | 1992   |     | 66222      |     | 291091       |                 |
| SLPI       | ALK1, ALP   | secretory leukocyte peptidase inhibitor                                             | 203021_at  | Cytoplasr  | other        |             | 6590   |     | 20568      |     | 84386        |                 |
| SPI1       | Dis-1, OF,  | spleen focus forming virus (SFFV) proviral integration oncogene spi1                | 205312_at  | Nucleus    | transcriptic |             | 6688   |     | 20375      |     | 366126       |                 |
| TGFA       | RATTGFA,    | transforming growth factor, alpha                                                   | 205016_at  | Extracellu | growth faci  |             | 7039   |     | 21802      |     | 24827        |                 |
| THBS1      | tbsp1, THE  | thrombospondin 1                                                                    | 201110_s_  | Extracellu | other        |             | 7057   |     | 21825      |     | 445442       |                 |
| TIMP1      | CLG1, EPA   | TIMP metallopeptidase inhibitor 1                                                   | 201666_at  | Extracellu | other        |             | 7076   |     | 21857      |     | 116510       |                 |
| TLR2       | CD282, Ly   | toll-like receptor 2                                                                | 204924_at  | Plasma M   | transmemt    |             | 7097   |     | 24088      |     | 310553       |                 |
| TLR4       | CD284, H1   | toll-like receptor 4                                                                | 240948_at  | Plasma M   | transmemt    | TAK-242     | 7099   |     | 21898      |     | 29260        |                 |
| TLR5       | FLJ10052,   | toll-like receptor 5                                                                | 210166_at  | Plasma M   | transmemt    |             | 7100   |     | 53791      |     | 289337       |                 |

©2000-2006 Ingenuity Systems, Inc. All rights reserved.

| Name      | Synonyms      | Description                                                                           | Affymetrix | Location   | Family       | Drugs        | Entrez | Ger | Entrez | Ger | Entrez | Gene ID for Rat |
|-----------|---------------|---------------------------------------------------------------------------------------|------------|------------|--------------|--------------|--------|-----|--------|-----|--------|-----------------|
| ACSL1     | ACAS, Aca     | acyl-CoA synthetase long-chain family member 1                                        | 207275_s_  | Cytoplasr  | enzyme       |              | 2180   |     | 14081  |     | 25288  |                 |
| ALOX5     | 5 LIPOXYC     | arachidonate 5-lipoxygenase                                                           | 214366_s_  | Cytoplasr  | enzyme       | TA 270 ,mε   | 240    |     | 11689  |     | 25290  |                 |
| ALOX5AP   | FLAP          | arachidonate 5-lipoxygenase-activating protein                                        | 204174_at  | Plasma M   | other        |              | 241    |     | 11690  |     | 29624  |                 |
| B4GALT5   | 9430078I0     | UDP-Gal:betaGlcNAc beta 1,4- galactosyltransferase, polypeptide 5                     | 221484_at  | Cytoplasr  | enzyme       |              | 9334   |     | 56336  |     | 362275 |                 |
| C1QA      | AI255395,     | complement component 1, q subcomponent, A chain                                       | 218232_at  | Extracellu | other        |              | 712    |     | 12259  |     | 298566 |                 |
| C1QB      | C1q Beta-1    | complement component 1, q subcomponent, B chain                                       | 202953_at  | Extracellu | other        |              | 713    |     | 12260  |     | 29687  |                 |
| C1QC      | AI385742,     | complement component 1, q subcomponent, C chain                                       | 225353_s_  | Extracellu | other        |              | 714    |     | 12262  |     | 362634 |                 |
| CEACAM1   | bb-1, BGP,    | carcinoembryonic antigen-related cell adhesion molecule 1 (biliary glycoprotein)      | 211883_x_  | Plasma M   | transmemt    |              | 634    |     | 26365  |     | 81613  |                 |
| CEACAM8   | CD66B, CI     | carcinoembryonic antigen-related cell adhesion molecule 8                             | 206676_at  | Plasma M   | other        |              | 1088   |     |        |     |        |                 |
| CEBPD     | C/EBP DE      | CCAAT/enhancer binding protein (C/EBP), delta                                         | 203973_s_  | Nucleus    | transcriptic |              | 1052   |     | 12609  |     | 25695  |                 |
| CITED2    | AI835299,     | Cbp/p300-interacting transactivator, with Glu/Asp-rich carboxy-terminal domain, 2     | 207980_s_  | Nucleus    | transcriptic |              | 10370  |     | 17684  |     | 114490 |                 |
| CTSD      | CATD, CA      | cathepsin D (lysosomal aspartyl peptidase)                                            | 200766_at  | Cytoplasr  | peptidase    |              | 1509   |     | 13033  |     | 171293 |                 |
| CUTL1     | AA407197      | cut-like 1, CCAAT displacement protein (Drosophila)                                   | 225937_at  | Nucleus    | transcriptic |              | 1523   |     | 13047  |     | 116639 |                 |
| DICER1    | 1110006FC     | Dicer1, Dcr-1 homolog (Drosophila)                                                    | 206061_s_  | Cytoplasr  | enzyme       |              | 23405  |     | 192119 |     | 299284 |                 |
| HPSE      | Hep, HEP/     | heparanase                                                                            | 219403_s_  | Plasma M   | enzyme       | heparanas    | 10855  |     | 15442  |     | 64537  |                 |
| HSPA1B    | 70kDa, HE     | heat shock 70kDa protein 1B                                                           | 202581_at  | Cytoplasr  | other        |              | 3304   |     | 15511  |     | 24472  |                 |
| IFNGR1    | CD119, FL     | interferon gamma receptor 1                                                           | 242903_at  | Plasma M   | transmemt    | interferon γ | 3459   |     | 15979  |     | 116465 |                 |
| IGF2R     | AI661837,     | insulin-like growth factor 2 receptor                                                 | 201393_s_  | Plasma M   | transmemt    |              | 3482   |     | 16004  |     | 25151  |                 |
| LMO2      | Lmos2, MK     | LIM domain only 2 (rhombotin-like 1)                                                  | 231049_at  | Nucleus    | other        |              | 4005   |     | 16909  |     | 362176 |                 |
| LRPAP1    | A2MRAP, /     | low density lipoprotein receptor-related protein associated protein 1                 | 201186_at  | Plasma M   | transmemt    |              | 4043   |     | 16976  |     | 116565 |                 |
| LTB4R     | BLT, BLT1,    | leukotriene B4 receptor                                                               | 236172_at  | Plasma M   | G-protein c  | etalocib     | 1241   |     | 16995  |     | 59264  |                 |
| M6PRBP1   | 1300012C      | mannose-6-phosphate receptor binding protein 1                                        | 202122_s_  | Cytoplasr  | other        |              | 10226  |     | 66905  |     |        |                 |
| MAML3 (in | CAGH3, E      | mastermind-like 3 (Drosophila)                                                        | 232726_at  | Nucleus    | transcriptic |              | 55534  |     |        |     | 310405 |                 |
| MMP8      | BB138268      | matrix metallopeptidase 8 (neutrophil collagenase)                                    | 207329_at  | Extracellu | peptidase    |              | 4317   |     | 17394  |     | 63849  |                 |
| MMP9      | AW743869      | matrix metallopeptidase 9 (gelatinase B, 92kDa gelatinase, 92kDa type IV collagenase) | 203936_s_  | Extracellu | peptidase    |              | 4318   |     | 17395  |     | 81687  |                 |
| PHC2      | AA415044      | polyhomeotic-like 2 (Drosophila)                                                      | 1557852_ε  | Nucleus    | other        |              | 1912   |     | 54383  |     | 313038 |                 |
| PKM2      | AA414905      | pyruvate kinase, muscle                                                               | 201251_at  | Cytoplasr  | kinase       |              | 5315   |     | 18746  |     | 25630  |                 |
| RARA      | ALPHA RA      | retinoic acid receptor, alpha                                                         | 228037_at  | Nucleus    | ligand-dep   | adapalene    | 5914   |     | 19401  |     | 24705  |                 |
| RBPSUH    | AI843960,     | recombining binding protein suppressor of hairless (Drosophila)                       | 211974_x_  | Nucleus    | transcriptic |              | 3516   |     | 19664  |     | 297767 |                 |
| SLC11A1 ( | Bcg, Itg, ity | solute carrier family 11 (proton-coupled divalent metal ion transporters), member 1   | 210423_s_  | Plasma M   | transporter  |              | 6556   |     | 18173  |     | 316519 |                 |
| SLC2A3    | AA408729      | solute carrier family 2 (facilitated glucose transporter), member 3                   | 202497_x_  | Plasma M   | transporter  |              | 6515   |     | 20527  |     | 25551  |                 |
| SOD2      | IPO-B, MC     | superoxide dismutase 2, mitochondrial                                                 | 215223_s_  | Cytoplasr  | enzyme       |              | 6648   |     | 20656  |     | 24787  |                 |
| SP1       | 1110003E1     | Sp1 transcription factor                                                              | 1553685_ε  | Nucleus    | transcriptic |              | 6667   |     | 20683  |     | 24790  |                 |
| THBD      | AI385582,     | thrombomodulin                                                                        | 203887_s_  | Plasma M   | transmemt    |              | 7056   |     | 21824  |     | 83580  |                 |
| TIMP2     | CSC-21K,      | TIMP metallopeptidase inhibitor 2                                                     | 203167_at  | Extracellu | other        |              | 7077   |     | 21858  |     | 29543  |                 |

©2000-2006 Ingenuity Systems, Inc. All rights reserved.

| Name       | Synonyms   | Description                                                                                                  | Affymetrix | Location   | Family        | Drugs       | Entrez | Ger | Entrez | Ger | Entrez       | Gene ID for Rat |
|------------|------------|--------------------------------------------------------------------------------------------------------------|------------|------------|---------------|-------------|--------|-----|--------|-----|--------------|-----------------|
| ANPEP      | AMINOPEP   | alanyl (membrane) aminopeptidase (aminopeptidase N, aminopeptidase M, microsomal aminopeptidase, CD13, p150) | 202888_s_  | Plasma     | M peptidase   |             | 290    |     | 16790  |     | 81641        |                 |
| ARF1       | MGC7283    | ADP-ribosylation factor 1                                                                                    | 208750_s_  | Cytoplasm  | transporter   |             | 375    |     | 11840  |     | 64310        |                 |
| BMX        | ETK, Etk/E | BMX non-receptor tyrosine kinase                                                                             | 206464_at  | Cytoplasm  | kinase        |             | 660    |     | 12169  |     | 367786       |                 |
| CBL        | 4732447J   | Cas-Br-M (murine) ecotropic retroviral transforming sequence                                                 | 229010_at  | Nucleus    | transcriptic  |             | 867    |     | 12402  |     | 500985       |                 |
| CD63       | C75951, L  | CD63 molecule                                                                                                | 200663_at  | Plasma     | M other       |             | 967    |     | 12512  |     | 29186        |                 |
| DDEF1      | AMAP1, A   | development and differentiation enhancing factor 1                                                           | 224796_at  | Plasma     | M other       |             | 50807  |     | 13196  |     | 314961       |                 |
| DEFA1 (inc | DEF1, DE   | defensin, alpha 1                                                                                            | 205033_s_  | Extracellu | other         |             | 1667   |     |        |     |              |                 |
| ELF2       | 2610036A   | E74-like factor 2 (ets domain transcription factor)                                                          | 1558877_ε  | Nucleus    | transcriptic  |             | 1998   |     | 69257  |     | 361944       |                 |
| ETV6       | AW123102   | ets variant gene 6 (TEL oncogene)                                                                            | 1561167_ε  | Nucleus    | transcriptic  |             | 2120   |     | 14011  |     | 312777       |                 |
| FCAR       | CD89, RG   | Fc fragment of IgA, receptor for                                                                             | 211307_s_  | Plasma     | M other       |             | 2204   |     |        |     | 365183       |                 |
| FFAR2      | FFA2R, G   | free fatty acid receptor 2                                                                                   | 221345_at  | Plasma     | M G-protein c |             | 2867   |     | 233079 |     | 292794       |                 |
| FGR        | C-FGR, F   | Gardner-Rasheed feline sarcoma viral (v-fgr) oncogene homolog                                                | 208438_s_  | Nucleus    | kinase        |             | 2268   |     | 14191  |     | 79113        |                 |
| GAB2       | AI463667,  | GRB2-associated binding protein 2                                                                            | 241004_at  | Cytoplasm  | other         |             | 9846   |     | 14389  |     | 84477        |                 |
| GIT2       | 1500036H   | G protein-coupled receptor kinase interactor 2                                                               | 209876_at  | Nucleus    | other         |             | 9815   |     | 26431  |     | 304546       |                 |
| HCK        | AI849071,  | hemopoietic cell kinase                                                                                      | 208018_s_  | Cytoplasm  | kinase        |             | 3055   |     | 15162  |     | 25734        |                 |
| HDAC4      | 4932408F   | histone deacetylase 4                                                                                        | 240870_at  | Nucleus    | transcriptic  | PXD101 ,v   | 9759   |     | 208727 |     | 84579 363287 |                 |
| IL10RB     | 6620401D   | interleukin 10 receptor, beta                                                                                | 230631_s_  | Plasma     | M transmemt   |             | 3588   |     | 16155  |     | 304091       |                 |
| IL13RA1    | AI882074,  | interleukin 13 receptor, alpha 1                                                                             | 201888_s_  | Plasma     | M transmemt   | cintredekin | 3597   |     | 16164  |     | 252963       |                 |
| JAK2       | AI504024,  | Janus kinase 2 (a protein tyrosine kinase)                                                                   | 1562031_ε  | Cytoplasm  | kinase        |             | 3717   |     | 16452  |     | 24514        |                 |
| KPNA4      | 1110058D   | karyopherin alpha 4 (importin alpha 3)                                                                       | 209653_at  | Nucleus    | transporter   |             | 3840   |     | 16649  |     | 361959       |                 |
| LYN        | AA407514   | v-yes-1 Yamaguchi sarcoma viral related oncogene homolog                                                     | 239555_at  | Cytoplasm  | kinase        |             | 4067   |     | 17096  |     | 81515        |                 |
| MAP3K2     | 9630061B   | mitogen-activated protein kinase kinase kinase 2                                                             | 221695_s_  | Cytoplasm  | kinase        |             | 10746  |     | 26405  |     | 171492       |                 |
| MAPKAPK    | AA960234   | mitogen-activated protein kinase-activated protein kinase 2                                                  | 201461_s_  | Nucleus    | kinase        |             | 9261   |     | 17164  |     | 289014       |                 |
| MEF2A      | A430079H   | MADS box transcription enhancer factor 2, polypeptide A (myocyte enhancer factor 2A)                         | 239571_at  | Nucleus    | transcriptic  |             | 4205   |     | 17258  |     | 365630       |                 |
| PILRA      | AV021745,  | paired immunoglobulin-like type 2 receptor alpha                                                             | 222218_s_  | Plasma     | M other       |             | 29992  |     | 231805 |     | 288568       |                 |
| PTPRC      | B220, CD   | protein tyrosine phosphatase, receptor type, C                                                               | 1569830_ε  | Plasma     | M phosphata   |             | 5788   |     | 19264  |     | 24699        |                 |
| PXN        | AW108311   | paxillin                                                                                                     | 211823_s_  | Cytoplasm  | other         |             | 5829   |     | 19303  |     | 360820       |                 |
| RALB       | 5730472O   | v-ral simian leukemia viral oncogene homolog B (ras related; GTP binding protein)                            | 202101_s_  | Cytoplasm  | enzyme        |             | 5899   |     | 64143  |     | 116546       |                 |
| REPS2      | POB1, RG   | RALBP1 associated Eps domain containing 2                                                                    | 227425_at  | Unknown    | other         |             | 9185   |     | 194590 |     | 363466       |                 |
| SIRPA      | AI835480,  | signal-regulatory protein alpha                                                                              | 202896_s_  | Plasma     | M phosphata   |             | 140885 |     | 19261  |     | 25528        |                 |
| SOCS3      | ATOD4, CI  | suppressor of cytokine signaling 3                                                                           | 206359_at  | Cytoplasm  | other         |             | 9021   |     | 12702  |     | 89829        |                 |
| SOS2       | mSos1, Sc  | son of sevenless homolog 2 (Drosophila)                                                                      | 217644_s_  | Cytoplasm  | other         |             | 6655   |     | 20663  |     | 85384        |                 |
| STAT3      | 1110034C   | signal transducer and activator of transcription 3 (acute-phase response factor)                             | 208992_s_  | Nucleus    | transcriptic  |             | 6774   |     | 20848  |     | 25125        |                 |
| STAT5B     | STAT5      | signal transducer and activator of transcription 5B                                                          | 205026_at  | Nucleus    | transcriptic  |             | 6777   |     | 20851  |     | 25126        |                 |
| WNK1       | 6430573H:  | WNK lysine deficient protein kinase 1                                                                        | 211992_at  | Cytoplasm  | kinase        |             | 65125  |     | 232341 |     | 116477       |                 |

©2000-2006 Ingenuity Systems, Inc. All rights reserved.

| Name       | Synonyms    | Description                                                                         | Affymetrix | Location   | Family      | Drugs       | Entrez | Ger   | Entrez | Ger | Entrez | Gene ID for Rat |
|------------|-------------|-------------------------------------------------------------------------------------|------------|------------|-------------|-------------|--------|-------|--------|-----|--------|-----------------|
| ABTB1      | AI847549,   | ankyrin repeat and BTB (POZ) domain containing 1                                    | 226442_at  | Cytoplasm  | translation |             | 80325  |       | 80283  |     | 297432 |                 |
| ACOX1      | ACO, ACO    | acyl-Coenzyme A oxidase 1, palmitoyl                                                | 213501_at  | Cytoplasm  | enzyme      |             | 51     |       | 11430  |     | 50681  |                 |
| ANXA3      | ANX3, LC3   | annexin A3                                                                          | 209369_at  | Cytoplasm  | enzyme      |             | 306    |       | 11745  |     | 25291  |                 |
| AP2B1      | 1300012O    | adaptor-related protein complex 2, beta 1 subunit                                   | 200615_s_  | Cytoplasm  | transporter |             | 163    |       | 71770  |     | 140670 |                 |
| ARRB2      | AI326910,   | arrestin, beta 2                                                                    | 203388_at  | Cytoplasm  | other       |             | 409    |       | 216869 |     | 25388  |                 |
| BCL2A1     | A1, A1-b, A | BCL2-related protein A1                                                             | 205681_at  | Cytoplasm  | other       |             | 597    | 12044 | 1204   |     | 170929 |                 |
| BCL2L1     | Bcl(X)L, Bc | BCL2-like 1                                                                         | 215037_s_  | Cytoplasm  | other       |             | 598    |       | 12048  |     | 24888  |                 |
| BPGM       | Ab2-098, A  | 2,3-bisphosphoglycerate mutase                                                      | 203502_at  | Unknown    | phosphata   |             | 669    |       | 12183  |     | 296973 |                 |
| CAPG       | AFCP, GC    | capping protein (actin filament), gelsolin-like                                     | 201850_at  | Nucleus    | other       |             | 822    |       | 12332  |     | 297339 |                 |
| CCR1       | CCL3 REC    | chemokine (C-C motif) receptor 1                                                    | 205099_s_  | Plasma M   | G-protein c |             | 1230   |       | 12768  |     | 57301  |                 |
| CFLAR      | C-FLIP, c-f | CASP8 and FADD-like apoptosis regulator                                             | 211862_x_  | Cytoplasm  | other       |             | 8837   |       | 12633  |     | 117279 |                 |
| CXCL16     | 0910001K    | chemokine (C-X-C motif) ligand 16                                                   | 223454_at  | Extracellu | cytokine    |             | 58191  |       | 66102  |     | 497942 |                 |
| EHD1       | AA409636    | EH-domain containing 1                                                              | 209038_s_  | Cytoplasm  | other       |             | 10938  |       | 13660  |     |        |                 |
| FKBP5      | 51kDa, D1   | FK506 binding protein 5                                                             | 204560_at  | Nucleus    | enzyme      |             | 2289   |       | 14229  |     | 361810 |                 |
| FPRL1 (inc | ALXR, E3    | formyl peptide receptor-like 1                                                      | 210773_s_  | Plasma M   | G-protein c |             | 2358   |       | 14289  |     | 292413 |                 |
| GBA        | GBA1, GC    | glucosidase, beta; acid (includes glucosylceramidase)                               | 209093_s_  | Cytoplasm  | enzyme      |             | 2629   |       | 14466  |     |        |                 |
| GSK3B      | 7330414F    | glycogen synthase kinase 3 beta                                                     | 209945_s_  | Nucleus    | kinase      | enzastaurii | 2932   |       | 56637  |     | 84027  |                 |
| HGF        | C230052L    | hepatocyte growth factor (hepapoietin A; scatter factor)                            | 209960_at  | Extracellu | growth fact |             | 3082   |       | 15234  |     | 24446  |                 |
| IGF1R      | CD221, hy   | insulin-like growth factor 1 receptor                                               | 203628_at  | Plasma M   | kinase      | IGF1        | 3480   |       | 16001  |     | 25718  |                 |
| IL8RA      | C-C, C-C-C  | interleukin 8 receptor, alpha                                                       | 207094_at  | Plasma M   | G-protein c | repertaxin  | 3577   |       | 227288 |     | 54258  |                 |
| IRS2       | 4PS         | insulin receptor substrate 2                                                        | 209184_s_  | Cytoplasm  | other       |             | 8660   |       | 384783 |     | 29376  |                 |
| LDLR       | FH, FHC, I  | low density lipoprotein receptor (familial hypercholesterolemia)                    | 202068_s_  | Plasma M   | transporter |             | 3949   |       | 16835  |     | 300438 |                 |
| NCF4       | AI451400,   | neutrophil cytosolic factor 4, 40kDa                                                | 205147_x_  | Cytoplasm  | enzyme      |             | 4689   |       | 17972  |     | 366956 |                 |
| NFKBIA     | AI462015,   | nuclear factor of kappa light polypeptide gene enhancer in B-cells inhibitor, alpha | 201502_s_  | Cytoplasm  | other       |             | 4792   |       | 18035  |     | 25493  |                 |
| NUMB       | B2 elemen   | numb homolog (Drosophila)                                                           | 236930_at  | Plasma M   | other       |             | 8650   |       | 18222  |     | 29419  |                 |
| PICALM     | AP180, CA   | phosphatidylinositol binding clathrin assembly protein                              | 239274_at  | Cytoplasm  | other       |             | 8301   |       | 233489 |     | 89816  |                 |
| PIK3CB     | 1110001J0   | phosphoinositide-3-kinase, catalytic, beta polypeptide                              | 217620_s_  | Cytoplasm  | kinase      |             | 5291   |       | 74769  |     | 85243  |                 |
| PTEN       | 2310035O    | phosphatase and tensin homolog (mutated in multiple advanced cancers 1)             | 242622_x_  | Cytoplasm  | phosphata   |             | 5728   |       | 19211  |     | 50557  |                 |
| PTX3       | AI607804,   | pentraxin-related gene, rapidly induced by IL-1 beta                                | 206157_at  | Extracellu | other       |             | 5806   |       | 19288  |     | 116998 |                 |
| RETN       | ADSF, FIZ   | resistin                                                                            | 220570_at  | Extracellu | other       |             | 56729  |       | 57264  |     | 246250 |                 |
| RTN4       | 1110020G    | reticulon 4                                                                         | 243031_at  | Cytoplasm  | other       |             | 57142  |       | 68585  |     | 83765  |                 |
| SRPK1      | AU017960    | SFRS protein kinase 1                                                               | 202200_s_  | Nucleus    | kinase      |             | 6732   |       | 20815  |     | 361811 |                 |
| TNFAIP6    | TNFIP6, T   | tumor necrosis factor, alpha-induced protein 6                                      | 206025_s_  | Extracellu | other       |             | 7130   |       | 21930  |     | 84397  |                 |
| TXN        | ADF, AW5    | thioredoxin                                                                         | 208864_s_  | Cytoplasm  | enzyme      |             | 7295   |       | 22166  |     | 116484 |                 |
| UBE2D3     | 1100001F1   | ubiquitin-conjugating enzyme E2D 3 (UBC4/5 homolog, yeast)                          | 240383_at  | Cytoplasm  | enzyme      |             | 7323   |       | 66105  |     | 81920  |                 |
