# Supplementary material
Source: PubMed Central journal article supplement (PMC2014731)
Supplement: 07_065_Shanley_Suppl_Data4.pdf [file 07_065_Shanley_Suppl_Data4.pdf]

©2000-2006 Ingenuity Systems, Inc. All rights reserved.

| Name    | Synonyms    | Description                                                                         |
|---------|-------------|-------------------------------------------------------------------------------------|
| CD14    | CD14 ANTI   | CD14 molecule                                                                       |
| CEBPB   | Agp/eb, C/i | CCAAT/enhancer binding protein (C/EBP), beta                                        |
| CYP19A1 | Ar, ArKO, A | cytochrome P450, family 19, subfamily A, polypeptide 1                              |
| IL1R1   | CD121A, C   | interleukin 1 receptor, type I                                                      |
| IL1R2   | CD121b, C   | interleukin 1 receptor, type II                                                     |
| JAK2    | AI504024, J | Janus kinase 2 (a protein tyrosine kinase)                                          |
| MAP2K6  | MAPK KIN.   | mitogen-activated protein kinase kinase 6                                           |
| MAPK14  | CRK1, CSE   | mitogen-activated protein kinase 14                                                 |
| MAPKAPK | AA960234,   | mitogen-activated protein kinase-activated protein kinase 2                         |
| NFKBIA  | AI462015, I | nuclear factor of kappa light polypeptide gene enhancer in B-cells inhibitor, alpha |
| SOS1    | GF1, GGF    | son of sevenless homolog 1 (Drosophila)                                             |
| SOS2    | mSos1, So   | son of sevenless homolog 2 (Drosophila)                                             |
| STAT3   | 1110034C0   | signal transducer and activator of transcription 3 (acute-phase response factor)    |
| TNFAIP6 | TNFIP6, T   | tumor necrosis factor, alpha-induced protein 6                                      |

| Affymetrix | Location  | Family | Drugs | Entrez Gen | Entrez Gen  | Entrez Gen   | Entrez Gen | Entrez Gen | Entrez Gen | Entrez Gen | Entrez Gene ID for Rat |
|------------|-----------|--------|-------|------------|-------------|--------------|------------|------------|------------|------------|------------------------|
| 201743_at  | 201743_at |        | 1     | 2          | Plasma Me   | transmemb    |            | 929        | 12475      | 60350      |                        |
| 212501_at  | --        |        | 2     |            | Nucleus     | transcriptio |            | 1051       | 12608      | 24253      |                        |
| 203475_at  | --        |        | 4     |            | Cytoplasm   | enzyme       | atamestan  | 1588       | 13075      | 25147      |                        |
| 202948_at  | 202948_at | 2, 7   |       | 1          | Plasma Me   | transmemb    | anakinra   | 3554       | 16177      | 25663      |                        |
| 205403_at  | 205403_at |        | 2     | 1          | Plasma Me   | transmemb    |            | 7850       | 16178      | 117022     |                        |
| 1562031_a  | 1562031_a |        | 3     | 4          | Cytoplasm   | kinase       |            | 3717       | 16452      | 24514      |                        |
| 205698_s_  | 205698_s_ |        | 2     | 15         | Cytoplasm   | kinase       |            | 5608       | 26399      | 114495     |                        |
| 202530_at  | 210449_x_ |        | 2     | 2          | Cytoplasm   | kinase       | SCIO-469   | 1432       | 26416      | 81649      |                        |
| 201461_s_  | 201461_s_ |        | 2     | 4          | Nucleus     | kinase       |            | 9261       | 17164      | 289014     |                        |
| 201502_s_  | 201502_s_ |        | 4     | 5          | Cytoplasm   | other        |            | 4792       | 18035      | 25493      |                        |
| 229261_at  | 229261_at |        | 5     | 18         | Cytoplasm   | other        |            | 6654       | 20662      | 313845     |                        |
| 217644_s_  | 217644_s_ |        | 1     | 4          | Cytoplasm   | other        |            | 6655       | 20663      | 85384      |                        |
| 208992_s_  | 208992_s_ |        | 1     | 4          | Nucleus     | transcriptio |            | 6774       | 20848      | 25125      |                        |
| 206026_s_  | 206025_s_ |        | 3     | 5          | Extracellul | other        |            | 7130       | 21930      | 84397      |                        |

Upregulated\_pathways

TAB 1-IL6 signaling Day 1

©2000-2006 Ingenuity Systems, Inc. All rights reserved.

| Name    | Synonyms  | Description                                                                         |
|---------|-----------|-------------------------------------------------------------------------------------|
| CD14    | CD14 ANT  | CD14 molecule                                                                       |
| LY96    | ESOP-1, M | lymphocyte antigen 96                                                               |
| MAP2K6  | MAPK KIN  | mitogen-activated protein kinase kinase 6                                           |
| MAPK14  | CRK1, CS  | mitogen-activated protein kinase 14                                                 |
| NFKBIA  | AI462015, | nuclear factor of kappa light polypeptide gene enhancer in B-cells inhibitor, alpha |
| PGLYRP1 | MGC1268   | peptidoglycan recognition protein 1                                                 |
| TLR2    | CD282, Ly | toll-like receptor 2                                                                |
| TLR4    | CD284, H1 | toll-like receptor 4                                                                |
| TLR5    | FLJ10052, | toll-like receptor 5                                                                |
| TLR8    | MGC1195   | toll-like receptor 8                                                                |

| Affymetrix | Location  | Family | Drugs    | Entrez Ger | Gene ID for Rat |
|------------|-----------|--------|----------|------------|------------|------------|------------|------------|------------|------------|------------|-----------------|
| 201743_at  | 201743_at |        | 1        | 2          | Plasma Mε  | transmemt  |            | 929        | 12475      | 60350      |            |                 |
| 206584_at  | 206584_at | 2, 10  |          | 2          | Plasma Mε  | other      |            | 23643      | 17087      | 448830     |            |                 |
| 205698_s_  | 205698_s_ |        | 2        | 15         | Cytoplasm  | kinase     |            | 5608       | 26399      | 114495     |            |                 |
| 202530_at  | 210449_x_ |        | 2        | 2          | Cytoplasm  | kinase     | SCIO-469   | 1432       | 26416      | 81649      |            |                 |
| 201502_s_  | 201502_s_ |        | 4        | 5          | Cytoplasm  | other      |            | 4792       | 18035      | 25493      |            |                 |
| 207384_at  | 207384_at |        |          |            | Plasma Mε  | transmemt  |            | 8993       | 21946      | 84387      |            |                 |
| 204924_at  | 204924_at |        | 2, 2, 22 |            | Plasma Mε  | transmemt  |            | 7097       | 24088      | 310553     |            |                 |
| 232068_s_  | 240948_at |        | 2        | 2          | Plasma Mε  | transmemt  | TAK-242    | 7099       | 21898      | 29260      |            |                 |
| 210166_at  | 210166_at |        | 9        | 2          | Plasma Mε  | transmemt  |            | 7100       | 53791      | 289337     |            |                 |
| 220832_at  | 220832_at |        | 10       | 17         | Plasma Mε  | transmemt  | resiquimoc | 51311      | 170744     |            |            |                 |

©2000-2006 Ingenuity Systems, Inc. All rights reserved.

| Name     | Synonyms   | Description                                                                         | Affymetrix | Location  | Family | Drugs | Entrez | Ger         | Entrez      | Ger         | Entrez | Ger       | Entrez | Ger | Entrez | Ger | Entrez | Gene ID for Rat |
|----------|------------|-------------------------------------------------------------------------------------|------------|-----------|--------|-------|--------|-------------|-------------|-------------|--------|-----------|--------|-----|--------|-----|--------|-----------------|
| C1QA     | AI255395,  | complement component 1, q subcomponent, A chain                                     | 218232_at  | 218232_at |        | 4     | 3      | Extracellul | other       |             | 712    | 12259     | 298566 |     |        |     |        |                 |
| C1QB     | C1q Beta-1 | complement component 1, q subcomponent, B chain                                     | 202953_at  | 202953_at |        | 4     | 3      | Extracellul | other       |             | 713    | 12260     | 29687  |     |        |     |        |                 |
| C1QC     | AI385742,  | complement component 1, q subcomponent, C chain                                     | 225353_s_  | 225353_s_ |        | 4     | 3      | Extracellul | other       |             | 714    | 12262     | 362634 |     |        |     |        |                 |
| C3AR1    | AZ3B, C3A  | complement component 3a receptor 1                                                  | 209906_at  | 209906_at |        | 14    | 7      | Plasma Me   | G-protein c |             | 719    | 12267     | 84007  |     |        |     |        |                 |
| C5AR1    | C5a, C5A   | complement component 5a receptor 1                                                  | 220088_at  | 220088_at |        | 3     | 1      | Plasma Me   | G-protein c |             | 728    | 12273     | 113959 |     |        |     |        |                 |
| CD55     | CR, DAF, I | CD55 molecule, decay accelerating factor for complement (Cromer blood group)        | 201926_s_  | 1555950_ε |        | 3     | 9      | Plasma Me   | other       |             | 1604   | 13136     | 64036  |     |        |     |        |                 |
| CD59     | 16.3A5, A7 | CD59 molecule, complement regulatory protein                                        | 200985_s_  | 212463_at |        | 3     | 9      | Plasma Me   | other       |             | 966    | 333883    | 25407  |     |        |     |        |                 |
| CR1      | C3b/C4b r  | complement component (3b/4b) receptor 1 (Knops blood group)                         | 239205_s_  | 206244_at |        | 19    | 17     | Plasma Me   | other       |             | 1378   | 12946     | 54243  |     |        |     |        |                 |
| F5       | Ac2-120, A | coagulation factor V (proaccelerin, labile factor)                                  | 204713_s_  | 204713_s_ |        | 3     | 2      | Plasma Me   | other       | drotrecogir | 2153   | 14067     | 304929 |     |        |     |        |                 |
| SERPINA1 | A1-PI, A1A | serpin peptidase inhibitor, clade A (alpha-1 antiproteinase, antitrypsin), member 1 | 211429_s_  | 202833_s_ |        | 1     | 2      | Extracellul | other       |             | 5265   | 20700 207 | 24648  |     |        |     |        |                 |

©2000-2006 Ingenuity Systems, Inc. All rights reserved.

| Name    | Synonyms  | Description                                                                          |
|---------|-----------|--------------------------------------------------------------------------------------|
| IL1R1   | CD121A, C | interleukin 1 receptor, type I                                                       |
| IL1R2   | CD121b, C | interleukin 1 receptor, type II                                                      |
| MAP2K6  | MAPK KIN  | mitogen-activated protein kinase 6                                                   |
| MAPK14  | CRK1, CSI | mitogen-activated protein kinase 14                                                  |
| MAPKAPK | AA960234  | mitogen-activated protein kinase-activated protein kinase 2                          |
| MEF2A   | A430079H  | MADS box transcription enhancer factor 2, polypeptide A (myocyte enhancer factor 2A) |
| MKNK1   | 2410048M  | MAP kinase interacting serine/threonine kinase 1                                     |

| Affymetrix | Location  | Family | Drugs | Entrez | Ger       | Entrez       | Ger      | Entrez | Ger   | Entrez | Ger | Entrez | Ger | Entrez | Gene ID for Rat |
|------------|-----------|--------|-------|--------|-----------|--------------|----------|--------|-------|--------|-----|--------|-----|--------|-----------------|
| 202948_at  | 202948_at | 2, 7   |       | 1      | Plasma Mε | transmemt    | anakinra | 3554   | 16177 | 25663  |     |        |     |        |                 |
| 205403_at  | 205403_at |        | 2     | 1      | Plasma Mε | transmemt    |          | 7850   | 16178 | 117022 |     |        |     |        |                 |
| 205698_s_  | 205698_s_ |        | 2     | 15     | Cytoplasm | kinase       |          | 5608   | 26399 | 114495 |     |        |     |        |                 |
| 202530_at  | 210449_x_ |        | 2     | 2      | Cytoplasm | kinase       | SCIO-469 | 1432   | 26416 | 81649  |     |        |     |        |                 |
| 201461_s_  | 201461_s_ |        | 2     | 4      | Nucleus   | kinase       |          | 9261   | 17164 | 289014 |     |        |     |        |                 |
| 208328_s_  | 239571_at |        | 2     | 4      | Nucleus   | transcriptic |          | 4205   | 17258 | 365630 |     |        |     |        |                 |
| 1560720_ε  | 243256_at |        | 2     | 2      | Cytoplasm | kinase       |          | 8569   | 17346 |        |     |        |     |        |                 |

©2000-2006 Ingenuity Systems, Inc. All rights reserved.

| Name   | Synonyms  | Description                                                                         | Affymetrix Location | Family    | Drugs    | Entrez Gene | Entrez Gene     | Entrez Gene   | Entrez Gene | Entrez Gene | Entrez Gene | Entrez Gene | Gene ID for Rat |
|--------|-----------|-------------------------------------------------------------------------------------|---------------------|-----------|----------|-------------|-----------------|---------------|-------------|-------------|-------------|-------------|-----------------|
| IL1R1  | CD121A, C | interleukin 1 receptor, type I                                                      | 202948_at           | 202948_at | 2, 7     | 1           | Plasma Membrane | transmembrane | anakinra    | 3554        | 16177       | 25663       |                 |
| IL1R2  | CD121b, C | interleukin 1 receptor, type II                                                     | 205403_at           | 205403_at | 2        | 1           | Plasma Membrane | transmembrane |             | 7850        | 16178       | 117022      |                 |
| IRAK3  | 4833428C  | interleukin-1 receptor-associated kinase 3                                          | 220034_at           | 220034_at | 7        | 7           | Unknown         | kinase        |             | 11213       | 73914       | 314870      |                 |
| MAP2K6 | MAPK KIN  | mitogen-activated protein kinase kinase 6                                           | 205698_s_           | 205698_s_ | 2        | 15          | Cytoplasm       | kinase        |             | 5608        | 26399       | 114495      |                 |
| NFKBIA | AI462015, | nuclear factor of kappa light polypeptide gene enhancer in B-cells inhibitor, alpha | 201502_s_           | 201502_s_ | 4        | 5           | Cytoplasm       | other         |             | 4792        | 18035       | 25493       |                 |
| TGFA   | RATTGFA,  | transforming growth factor, alpha                                                   | 205016_at           | 205016_at | 1        | 2           | Extracellular   | growth factor |             | 7039        | 21802       | 24827       |                 |
| TLR2   | CD282, Ly | toll-like receptor 2                                                                | 204924_at           | 204924_at | 2, 2, 22 |             | Plasma Membrane | transmembrane |             | 7097        | 24088       | 310553      |                 |
| TLR4   | CD284, H1 | toll-like receptor 4                                                                | 232068_s_           | 240948_at | 2        | 2           | Plasma Membrane | transmembrane | TAK-242     | 7099        | 21898       | 29260       |                 |
| TLR5   | FLJ10052, | toll-like receptor 5                                                                | 210166_at           | 210166_at | 9        | 2           | Plasma Membrane | transmembrane |             | 7100        | 53791       | 289337      |                 |
| TLR8   | MGC1195,  | toll-like receptor 8                                                                | 220832_at           | 220832_at | 10       | 17          | Plasma Membrane | transmembrane | resiquimod  | 51311       | 170744      |             |                 |

©2000-2006 Ingenuity Systems, Inc. All rights reserved.

| Name   | Synonyms  | Description                                                                         | Affymetrix Location | Family    | Drugs | Entrez Gene | Entrez Gene     | Entrez Gene       | Entrez Gene | Entrez Gene | Entrez Gene | Entrez Gene | Entrez Gene | Gene ID for Rat |
|--------|-----------|-------------------------------------------------------------------------------------|---------------------|-----------|-------|-------------|-----------------|-------------------|-------------|-------------|-------------|-------------|-------------|-----------------|
| CCR1   | CCL3 REC  | chemokine (C-C motif) receptor 1                                                    | 205099_s_           | 205099_s_ | 11    | 5           | Plasma Membrane | G-protein coupled |             | 1230        | 12768       | 57301       |             |                 |
| CD14   | CD14 ANT  | CD14 molecule                                                                       | 201743_at           | 201743_at | 1     | 2           | Plasma Membrane | transmembrane     |             | 929         | 12475       | 60350       |             |                 |
| IL10RB | 6620401D  | interleukin 10 receptor, beta                                                       | 230632_at           | 230631_s_ | 1     | 4           | Plasma Membrane | transmembrane     |             | 3588        | 16155       | 304091      |             |                 |
| IL1R1  | CD121A, C | interleukin 1 receptor, type I                                                      | 202948_at           | 202948_at | 2, 7  | 1           | Plasma Membrane | transmembrane     | anakinra    | 3554        | 16177       | 25663       |             |                 |
| IL1R2  | CD121b, C | interleukin 1 receptor, type II                                                     | 205403_at           | 205403_at | 2     | 1           | Plasma Membrane | transmembrane     |             | 7850        | 16178       | 117022      |             |                 |
| MAP2K6 | MAPK KIN  | mitogen-activated protein kinase 6                                                  | 205698_s_           | 205698_s_ | 2     | 15          | Cytoplasm       | kinase            |             | 5608        | 26399       | 114495      |             |                 |
| MAPK14 | CRK1, CS  | mitogen-activated protein kinase 14                                                 | 202530_at           | 210449_x_ | 2     | 2           | Cytoplasm       | kinase            | SCIO-469    | 1432        | 26416       | 81649       |             |                 |
| NFKBIA | AI462015, | nuclear factor of kappa light polypeptide gene enhancer in B-cells inhibitor, alpha | 201502_s_           | 201502_s_ | 4     | 5           | Cytoplasm       | other             |             | 4792        | 18035       | 25493       |             |                 |
| SOCS3  | ATOD4, CI | suppressor of cytokine signaling 3                                                  | 227697_at           | 206359_at | 1     | 4           | Cytoplasm       | other             |             | 9021        | 12702       | 89829       |             |                 |
| STAT3  | 1110034C  | signal transducer and activator of transcription 3 (acute-phase response factor)    | 208992_s_           | 208992_s_ | 1     | 4           | Nucleus         | transcript        |             | 6774        | 20848       | 25125       |             |                 |

©2000-2006 Ingenuity Systems, Inc. All rights reserved.

| Name   | Synonyms    | Description                                                                        | Affymetrix Location | Family    | Drugs | Entrez Gene | Entrez Gene     | Entrez Gene          | Entrez Gene | Entrez Gene | Entrez Gene | Entrez Gene | Entrez Gene | Gene ID for Rat |
|--------|-------------|------------------------------------------------------------------------------------|---------------------|-----------|-------|-------------|-----------------|----------------------|-------------|-------------|-------------|-------------|-------------|-----------------|
| BCL2A1 | A1, A1-b, A | BCL2-related protein A1                                                            | 205681_at           | 205681_at | 3     | 5           | Cytoplasm       | other                |             | 597         | 12044       | 1120        | 170929      |                 |
| CSF2RA | CD116, C    | colony stimulating factor 2 receptor, alpha, low-affinity (granulocyte-macrophage) | 207085_x_           | 210340_s_ | 1     | 1           | Plasma Membrane | transmembrane        | sargramos   | 1438        | 12982       |             |             |                 |
| HCK    | A1849071,   | hemopoietic cell kinase                                                            | 208018_s_           | 208018_s_ | 1     | 4           | Cytoplasm       | kinase               |             | 3055        | 15162       |             | 25734       |                 |
| JAK2   | A1504024,   | Janus kinase 2 (a protein tyrosine kinase)                                         | 1562031_ε           | 1562031_ε | 3     | 4           | Cytoplasm       | kinase               |             | 3717        | 16452       |             | 24514       |                 |
| LYN    | AA407514    | v-src-related tyrosine kinase 1 (Yamaguchi sarcoma viral related oncogene homolog) | 202626_s_           | 239555_at | 3     | 4           | Cytoplasm       | kinase               |             | 4067        | 17096       |             | 81515       |                 |
| SOS1   | GF1, GGF    | son of sevenless homolog 1 (Drosophila)                                            | 229261_at           | 229261_at | 5     | 18          | Cytoplasm       | other                |             | 6654        | 20662       |             | 313845      |                 |
| STAT3  | 1110034C    | signal transducer and activator of transcription 3 (acute-phase response factor)   | 208992_s_           | 208992_s_ | 1     | 4           | Nucleus         | transcription factor |             | 6774        | 20848       |             | 25125       |                 |
| STAT5B | STAT5       | signal transducer and activator of transcription 5B                                | 205026_at           | 205026_at | 3     | 4           | Nucleus         | transcription factor |             | 6777        | 20851       |             | 25126       |                 |

©2000-2006 Ingenuity Systems, Inc. All rights reserved.

| Name    | Synonyms     | Description                                                                         | Affymetrix Location | Family     | Drugs | Entrez Gene | Entrez Gene     | Entrez Gene  | Entrez Gene | Entrez Gene | Entrez Gene | Entrez Gene | Entrez Gene | Gene ID for Rat |
|---------|--------------|-------------------------------------------------------------------------------------|---------------------|------------|-------|-------------|-----------------|--------------|-------------|-------------|-------------|-------------|-------------|-----------------|
| BCL6    | BCL5, Bcl6   | B-cell CLL/lymphoma 6 (zinc finger protein 51)                                      | 203140_at           | 215990_s_  | 4     | 12          | Nucleus         | transcriptic |             |             | 604         | 12053       | 303836      |                 |
| BCL2A1  | A1, A1-b, A1 | BCL2-related protein A1                                                             | 205681_at           | 205681_at  | 3     | 5           | Cytoplasm       | other        |             |             | 597         | 12044 120   | 170929      |                 |
| GAB2    | AI463667,    | GRB2-associated binding protein 2                                                   | 238405_at           | 241004_at  | 3     | 4           | Cytoplasm       | other        |             |             | 9846        | 14389       | 84477       |                 |
| LYN     | AA407514     | v-src-related tyrosine kinase 1                                                     | 202626_s_           | 239555_at  | 3     | 4           | Cytoplasm       | kinase       |             |             | 4067        | 17096       | 81515       |                 |
| MAP2K6  | MAPK KIN     | mitogen-activated protein kinase kinase 6                                           | 205698_s_           | 205698_s_  | 2     | 15          | Cytoplasm       | kinase       |             |             | 5608        | 26399       | 114495      |                 |
| MAPK14  | CRK1, CS1    | mitogen-activated protein kinase 14                                                 | 202530_at           | 210449_x_  | 2     | 2           | Cytoplasm       | kinase       | SCIO-469    |             | 1432        | 26416       | 81649       |                 |
| NFKBIA  | AI462015,    | nuclear factor of kappa light polypeptide gene enhancer in B-cells inhibitor, alpha | 201502_s_           | 201502_s_  | 4     | 5           | Cytoplasm       | other        |             |             | 4792        | 18035       | 25493       |                 |
| PIK3AP1 | 1810044JC    | phosphoinositide-3-kinase adaptor protein 1                                         | 1554508_ε           | 1554508_at |       |             | Cytoplasm       | other        |             |             | 118788      | 83490       | 294048      |                 |
| PTEN    | 2310035O     | phosphatase and tensin homolog (mutated in multiple advanced cancers 1)             | 242622_x_           | 242622_x_  | 4     | 5, 19       | Cytoplasm       | phosphata    |             |             | 5728        | 19211       | 50557       |                 |
| PTPRC   | B220, CD4    | protein tyrosine phosphatase, receptor type, C                                      | 1569830_ε           | 1569830_ε  | 3     | 4           | Plasma Membrane | phosphata    |             |             | 5788        | 19264       | 24699       |                 |
| SOS1    | GF1, GGF     | son of sevenless homolog 1 (Drosophila)                                             | 229261_at           | 229261_at  | 5     | 18          | Cytoplasm       | other        |             |             | 6654        | 20662       | 313845      |                 |
| SOS2    | mSos1, Sc    | son of sevenless homolog 2 (Drosophila)                                             | 217644_s_           | 217644_s_  | 1     | 4           | Cytoplasm       | other        |             |             | 6655        | 20663       | 85384       |                 |



©2000-2006 Ingenuity Systems, Inc. All rights reserved.

| Name    | Synonyms  | Description                                                                         |
|---------|-----------|-------------------------------------------------------------------------------------|
| CD14    | CD14 ANT  | CD14 molecule                                                                       |
| FOS     | C-FOS, D1 | v-fos FBJ murine osteosarcoma viral oncogene homolog                                |
| LY96    | ESOP-1, M | lymphocyte antigen 96                                                               |
| MAP2K6  | MAPK KIN  | mitogen-activated protein kinase kinase 6                                           |
| MAPK14  | CRK1, CS  | mitogen-activated protein kinase 14                                                 |
| NFKBIA  | AI462015, | nuclear factor of kappa light polypeptide gene enhancer in B-cells inhibitor, alpha |
| PGLYRP1 | MGC12689  | peptidoglycan recognition protein 1                                                 |
| TLR2    | CD282, Ly | toll-like receptor 2                                                                |
| TLR4    | CD284, H1 | toll-like receptor 4                                                                |
| TLR5    | FLJ10052, | toll-like receptor 5                                                                |
| TLR8    | MGC11959  | toll-like receptor 8                                                                |

| Affymetrix | Location  | Family | Drugs | Entrez | Ger       | Entrez       | Ger        | Entrez | Ger    | Entrez | Ger | Entrez | Ger | Entrez | Gene ID for Rat |
|------------|-----------|--------|-------|--------|-----------|--------------|------------|--------|--------|--------|-----|--------|-----|--------|-----------------|
| 201743_at  | 201743_at |        | 1     | 2      | Plasma Mε | transmemt    |            | 929    | 12475  | 60350  |     |        |     |        |                 |
| --         | 209189_at |        | 17    | 1      | Nucleus   | transcriptic |            | 2353   | 14281  | 314322 |     |        |     |        |                 |
| 206584_at  | 206584_at | 2, 10  |       | 2      | Plasma Mε | other        |            | 23643  | 17087  | 448830 |     |        |     |        |                 |
| 205698_s_  | 205698_s_ |        | 2     | 15     | Cytoplasm | kinase       |            | 5608   | 26399  | 114495 |     |        |     |        |                 |
| 202530_at  | 210449_x_ |        | 2     | 2      | Cytoplasm | kinase       | SCIO-469   | 1432   | 26416  | 81649  |     |        |     |        |                 |
| 201502_s_  | 201502_s_ |        | 4     | 5      | Cytoplasm | other        |            | 4792   | 18035  | 25493  |     |        |     |        |                 |
| 207384_at  | 207384_at |        |       |        | Plasma Mε | transmemt    |            | 8993   | 21946  | 84387  |     |        |     |        |                 |
| 204924_at  | 204924_at |        | 2     | 2, 22  | Plasma Mε | transmemt    |            | 7097   | 24088  | 310553 |     |        |     |        |                 |
| 232068_s_  | 240948_at |        | 2     | 2      | Plasma Mε | transmemt    | TAK-242    | 7099   | 21898  | 29260  |     |        |     |        |                 |
| 210166_at  | 210166_at |        | 9     | 2      | Plasma Mε | transmemt    |            | 7100   | 53791  | 289337 |     |        |     |        |                 |
| 220832_at  | 220832_at |        | 10    | 17     | Plasma Mε | transmemt    | resiquimoc | 51311  | 170744 |        |     |        |     |        |                 |

©2000-2006 Ingenuity Systems, Inc. All rights reserved.

| Name    | Synonyms  | Description                                                                         |
|---------|-----------|-------------------------------------------------------------------------------------|
| CD14    | CD14 ANT  | CD14 molecule                                                                       |
| FOS     | C-FOS, D1 | v-fos FBJ murine osteosarcoma viral oncogene homolog                                |
| LY96    | ESOP-1, M | lymphocyte antigen 96                                                               |
| MAP2K6  | MAPK KIN  | mitogen-activated protein kinase kinase 6                                           |
| MAPK14  | CRK1, CS  | mitogen-activated protein kinase 14                                                 |
| NFKBIA  | AI462015, | nuclear factor of kappa light polypeptide gene enhancer in B-cells inhibitor, alpha |
| PGLYRP1 | MGC12689  | peptidoglycan recognition protein 1                                                 |
| TLR2    | CD282, Ly | toll-like receptor 2                                                                |
| TLR4    | CD284, H1 | toll-like receptor 4                                                                |
| TLR5    | FLJ10052, | toll-like receptor 5                                                                |
| TLR8    | MGC11959  | toll-like receptor 8                                                                |

| Affymetrix | Location  | Family | Drugs | Entrez | Ger       | Entrez       | Ger        | Entrez | Ger    | Entrez | Ger | Entrez | Ger | Entrez | Gene ID for Rat |
|------------|-----------|--------|-------|--------|-----------|--------------|------------|--------|--------|--------|-----|--------|-----|--------|-----------------|
| 201743_at  | 201743_at |        | 1     | 2      | Plasma Mε | transmemt    |            | 929    | 12475  | 60350  |     |        |     |        |                 |
| --         | 209189_at |        | 17    | 1      | Nucleus   | transcriptic |            | 2353   | 14281  | 314322 |     |        |     |        |                 |
| 206584_at  | 206584_at | 2, 10  |       | 2      | Plasma Mε | other        |            | 23643  | 17087  | 448830 |     |        |     |        |                 |
| 205698_s_  | 205698_s_ |        | 2     | 15     | Cytoplasm | kinase       |            | 5608   | 26399  | 114495 |     |        |     |        |                 |
| 202530_at  | 210449_x_ |        | 2     | 2      | Cytoplasm | kinase       | SCIO-469   | 1432   | 26416  | 81649  |     |        |     |        |                 |
| 201502_s_  | 201502_s_ |        | 4     | 5      | Cytoplasm | other        |            | 4792   | 18035  | 25493  |     |        |     |        |                 |
| 207384_at  | 207384_at |        |       |        | Plasma Mε | transmemt    |            | 8993   | 21946  | 84387  |     |        |     |        |                 |
| 204924_at  | 204924_at |        | 2     | 2, 22  | Plasma Mε | transmemt    |            | 7097   | 24088  | 310553 |     |        |     |        |                 |
| 232068_s_  | 240948_at |        | 2     | 2      | Plasma Mε | transmemt    | TAK-242    | 7099   | 21898  | 29260  |     |        |     |        |                 |
| 210166_at  | 210166_at |        | 9     | 2      | Plasma Mε | transmemt    |            | 7100   | 53791  | 289337 |     |        |     |        |                 |
| 220832_at  | 220832_at |        | 10    | 17     | Plasma Mε | transmemt    | resiquimoc | 51311  | 170744 |        |     |        |     |        |                 |

©2000-2006 Ingenuity Systems, Inc. All rights reserved.

| Name     | Synonyms   | Description                                                                         | Affymetrix | Location    | Family | Drugs | Entrez | Ger         | Entrez      | Ger         | Entrez | Ger       | Entrez | Ger | Entrez | Ger | Entrez | Gene ID for Rat |
|----------|------------|-------------------------------------------------------------------------------------|------------|-------------|--------|-------|--------|-------------|-------------|-------------|--------|-----------|--------|-----|--------|-----|--------|-----------------|
| C1QA     | AI255395,  | complement component 1, q subcomponent, A chain                                     | 218232_at  | 218232_at   |        | 4     | 3      | Extracellul | other       |             | 712    | 12259     | 298566 |     |        |     |        |                 |
| C1QB     | C1q Beta-1 | complement component 1, q subcomponent, B chain                                     | 202953_at  | 202953_at   |        | 4     | 3      | Extracellul | other       |             | 713    | 12260     | 29687  |     |        |     |        |                 |
| C1QC     | AI385742,  | complement component 1, q subcomponent, C chain                                     | 225353_s_  | 225353_s_   |        | 4     | 3      | Extracellul | other       |             | 714    | 12262     | 362634 |     |        |     |        |                 |
| C3AR1    | AZ3B, C3A  | complement component 3a receptor 1                                                  | 209906_at  | 209906_at   |        | 14    | 7      | Plasma Me   | G-protein c |             | 719    | 12267     | 84007  |     |        |     |        |                 |
| C5AR1    | C5a, C5A   | complement component 5a receptor 1                                                  | 220088_at  | 220088_at   |        | 3     | 1      | Plasma Me   | G-protein c |             | 728    | 12273     | 113959 |     |        |     |        |                 |
| CD55     | CR, DAF, I | CD55 molecule, decay accelerating factor for complement (Cromer blood group)        | 201926_s_  | 1555950_ε   |        | 3     | 9      | Plasma Me   | other       |             | 1604   | 13136     | 64036  |     |        |     |        |                 |
| CD59     | 16.3A5, A7 | CD59 molecule, complement regulatory protein                                        | 200985_s_  | 212463_at   |        | 3     | 9      | Plasma Me   | other       |             | 966    | 333883    | 25407  |     |        |     |        |                 |
| CR1      | C3b/C4b r  | complement component (3b/4b) receptor 1 (Knops blood group)                         | 239205_s_  | 206244_at   |        | 19    | 17     | Plasma Me   | other       |             | 1378   | 12946     | 54243  |     |        |     |        |                 |
| F5       | Ac2-120, A | coagulation factor V (proaccelerin, labile factor)                                  | 204713_s_  | 204713_s_   |        | 3     | 2      | Plasma Me   | other       | drotrecogir | 2153   | 14067     | 304929 |     |        |     |        |                 |
| SERPINA1 | A1-PI, A1A | serpin peptidase inhibitor, clade A (alpha-1 antiproteinase, antitrypsin), member 1 | 211429_s_  | 202833_s_   |        | 1     | 2      | Extracellul | other       |             | 5265   | 20700 207 | 24648  |     |        |     |        |                 |
| THBD     | AI385582,  | thrombomodulin                                                                      | --         | 203887_s_at |        |       | 3      | Plasma Me   | transmemt   |             | 7056   | 21824     | 83580  |     |        |     |        |                 |

©2000-2006 Ingenuity Systems, Inc. All rights reserved.

| Name    | Synonyms    | Description                                                                          |
|---------|-------------|--------------------------------------------------------------------------------------|
| IL1A    | IL-1, IL1-A | interleukin 1, alpha                                                                 |
| IL1R1   | CD121A, C   | interleukin 1 receptor, type I                                                       |
| IL1R2   | CD121b, C   | interleukin 1 receptor, type II                                                      |
| MAP2K6  | MAPK KIN    | mitogen-activated protein kinase kinase 6                                            |
| MAPK14  | CRK1, CSI   | mitogen-activated protein kinase 14                                                  |
| MAPKAPK | AA960234    | mitogen-activated protein kinase-activated protein kinase 2                          |
| MEF2A   | A430079H    | MADS box transcription enhancer factor 2, polypeptide A (myocyte enhancer factor 2A) |
| MKNK1   | 2410048M    | MAP kinase interacting serine/threonine kinase 1                                     |

| Affymetrix | Location  | Family | Drugs | Entrez Ger | Entrez Ger  | Entrez Ger   | Entrez Ger | Entrez Ger | Entrez Ger | Entrez Gene ID for Rat |
|------------|-----------|--------|-------|------------|-------------|--------------|------------|------------|------------|------------------------|
| --         | 208200_at |        | 17    | 1          | Extracellul | cytokine     | IL-1 Trap  | 3552       | 16175      | 24493                  |
| 202948_at  | 202948_at | 2, 7   |       | 1          | Plasma Me   | transmemt    | anakinra   | 3554       | 16177      | 25663                  |
| 205403_at  | 205403_at |        | 2     | 1          | Plasma Me   | transmemt    |            | 7850       | 16178      | 117022                 |
| 205698_s_  | 205698_s_ |        | 2     | 15         | Cytoplasm   | kinase       |            | 5608       | 26399      | 114495                 |
| 202530_at  | 210449_x_ |        | 2     | 2          | Cytoplasm   | kinase       | SCIO-469   | 1432       | 26416      | 81649                  |
| 201461_s_  | 201461_s_ |        | 2     | 4          | Nucleus     | kinase       |            | 9261       | 17164      | 289014                 |
| 208328_s_  | 239571_at |        | 2     | 4          | Nucleus     | transcriptic |            | 4205       | 17258      | 365630                 |
| 1560720_ε  | 243256_at |        | 2     | 2          | Cytoplasm   | kinase       |            | 8569       | 17346      |                        |

©2000-2006 Ingenuity Systems, Inc. All rights reserved.

| Name   | Synonyms    | Description                                                                         | Affymetrix | Location    | Family | Drugs    | Entrez | Ger         | Entrez     | Ger        | Entrez | Ger   | Entrez | Ger    | Entrez | Ger | Entrez | Gene ID for Rat |
|--------|-------------|-------------------------------------------------------------------------------------|------------|-------------|--------|----------|--------|-------------|------------|------------|--------|-------|--------|--------|--------|-----|--------|-----------------|
| GSK3B  | 7330414F    | glycogen synthase kinase 3 beta                                                     | --         | 209945_s_at |        |          | 5      | Nucleus     | kinase     | enzastauri |        | 2932  | 56637  | 84027  |        |     |        |                 |
| IL1A   | IL-1, IL1-A | interleukin 1, alpha                                                                | --         | 208200_at   |        | 17       | 1      | Extracellul | cytokine   | IL-1 Trap  |        | 3552  | 16175  | 24493  |        |     |        |                 |
| IL1R1  | CD121A, C   | interleukin 1 receptor, type I                                                      | 202948_at  | 202948_at   | 2, 7   |          | 1      | Plasma Me   | transmemt  | anakinra   |        | 3554  | 16177  | 25663  |        |     |        |                 |
| IL1R2  | CD121b, C   | interleukin 1 receptor, type II                                                     | 205403_at  | 205403_at   |        | 2        | 1      | Plasma Me   | transmemt  |            |        | 7850  | 16178  | 117022 |        |     |        |                 |
| IRAK3  | 4833428C    | interleukin-1 receptor-associated kinase 3                                          | 220034_at  | 220034_at   |        | 7        | 7      | Unknown     | kinase     |            |        | 11213 | 73914  | 314870 |        |     |        |                 |
| MAP2K6 | MAPK KIN    | mitogen-activated protein kinase kinase 6                                           | 205698_s_  | 205698_s_   |        | 2        | 15     | Cytoplasm   | kinase     |            |        | 5608  | 26399  | 114495 |        |     |        |                 |
| NFKBIA | AI462015,   | nuclear factor of kappa light polypeptide gene enhancer in B-cells inhibitor, alpha | 201502_s_  | 201502_s_   |        | 4        | 5      | Cytoplasm   | other      |            |        | 4792  | 18035  | 25493  |        |     |        |                 |
| PIK3CB | 1110001J0   | phosphoinositide-3-kinase, catalytic, beta polypeptide                              | --         | 217620_s_at |        |          | 5      | Cytoplasm   | kinase     |            |        | 5291  | 74769  | 85243  |        |     |        |                 |
| TGFA   | RATTGFA,    | transforming growth factor, alpha                                                   | 205016_at  | 205016_at   |        | 1        | 2      | Extracellul | growth fac |            |        | 7039  | 21802  | 24827  |        |     |        |                 |
| TLR2   | CD282, Ly   | toll-like receptor 2                                                                | 204924_at  | 204924_at   |        | 2, 2, 22 |        | Plasma Me   | transmemt  |            |        | 7097  | 24088  | 310553 |        |     |        |                 |
| TLR4   | CD284, H1   | toll-like receptor 4                                                                | 232068_s_  | 240948_at   |        | 2        | 2      | Plasma Me   | transmemt  | TAK-242    |        | 7099  | 21898  | 29260  |        |     |        |                 |
| TLR5   | FLJ10052,   | toll-like receptor 5                                                                | 210166_at  | 210166_at   |        | 9        | 2      | Plasma Me   | transmemt  |            |        | 7100  | 53791  | 289337 |        |     |        |                 |
| TLR8   | MGC11959    | toll-like receptor 8                                                                | 220832_at  | 220832_at   |        | 10       | 17     | Plasma Me   | transmemt  | resiquimoc |        | 51311 | 170744 |        |        |     |        |                 |

©2000-2006 Ingenuity Systems, Inc. All rights reserved.

| Name   | Synonyms    | Description                                                                         | Affymetrix | Location   | Family | Drugs | Entrez       | Ger          | Entrez    | Ger | Entrez | Ger   | Entrez | Ger | Entrez | Ger | Entrez | Gene ID for Rat |
|--------|-------------|-------------------------------------------------------------------------------------|------------|------------|--------|-------|--------------|--------------|-----------|-----|--------|-------|--------|-----|--------|-----|--------|-----------------|
| CCR1   | CCL3 REC    | chemokine (C-C motif) receptor 1                                                    | 205099_s_  | 205099_s_  | 11     | 5     | Plasma Mε    | G-protein c  |           |     | 1230   | 12768 | 57301  |     |        |     |        |                 |
| CD14   | CD14 ANT    | CD14 molecule                                                                       | 201743_at  | 201743_at  | 1      | 2     | Plasma Mε    | transmemt    |           |     | 929    | 12475 | 60350  |     |        |     |        |                 |
| FCGR2A | CD16, CD:   | Fc fragment of IgG, low affinity IIa, receptor (CD32)                               | --         | 1565674_at |        | 2     | Plasma Mε    | transmemt    |           |     | 2212   | 14131 | 116591 |     |        |     |        |                 |
| FOS    | C-FOS, D1   | v-fos FBJ murine osteosarcoma viral oncogene homolog                                | --         | 209189_at  | 17     | 1     | Nucleus      | transcriptic |           |     | 2353   | 14281 | 314322 |     |        |     |        |                 |
| IL10RB | 6620401D    | interleukin 10 receptor, beta                                                       | 230632_at  | 230631_s_  | 1      | 4     | Plasma Mε    | transmemt    |           |     | 3588   | 16155 | 304091 |     |        |     |        |                 |
| IL1A   | IL-1, IL1-A | interleukin 1, alpha                                                                | --         | 208200_at  | 17     | 1     | Extracellul: | cytokine     | IL-1 Trap |     | 3552   | 16175 | 24493  |     |        |     |        |                 |
| IL1R1  | CD121A, C   | interleukin 1 receptor, type I                                                      | 202948_at  | 202948_at  | 2, 7   | 1     | Plasma Mε    | transmemt    | anakinra  |     | 3554   | 16177 | 25663  |     |        |     |        |                 |
| IL1R2  | CD121b, C   | interleukin 1 receptor, type II                                                     | 205403_at  | 205403_at  | 2      | 1     | Plasma Mε    | transmemt    |           |     | 7850   | 16178 | 117022 |     |        |     |        |                 |
| MAP2K6 | MAPK KIN    | mitogen-activated protein kinase kinase 6                                           | 205698_s_  | 205698_s_  | 2      | 15    | Cytoplasm    | kinase       |           |     | 5608   | 26399 | 114495 |     |        |     |        |                 |
| MAPK1  | 9030612K    | mitogen-activated protein kinase 1                                                  | --         | 242106_at  |        | 2     | Cytoplasm    | kinase       |           |     | 5594   | 26413 | 116590 |     |        |     |        |                 |
| MAPK14 | CRK1, CS    | mitogen-activated protein kinase 14                                                 | 202530_at  | 210449_x_  | 2      | 2     | Cytoplasm    | kinase       | SCIO-469  |     | 1432   | 26416 | 81649  |     |        |     |        |                 |
| NFKBIA | A1462015,   | nuclear factor of kappa light polypeptide gene enhancer in B-cells inhibitor, alpha | 201502_s_  | 201502_s_  | 4      | 5     | Cytoplasm    | other        |           |     | 4792   | 18035 | 25493  |     |        |     |        |                 |
| SOCS3  | ATOD4, CI   | suppressor of cytokine signaling 3                                                  | 227697_at  | 206359_at  | 1      | 4     | Cytoplasm    | other        |           |     | 9021   | 12702 | 89829  |     |        |     |        |                 |
| SP1    | 1110003E1   | Sp1 transcription factor                                                            | --         | 1553685_s_ | 16     | 3     | Nucleus      | transcriptic |           |     | 6667   | 20683 | 24790  |     |        |     |        |                 |
| STAT3  | 1110034C    | signal transducer and activator of transcription 3 (acute-phase response factor)    | 208992_s_  | 208992_s_  | 1      | 4     | Nucleus      | transcriptic |           |     | 6774   | 20848 | 25125  |     |        |     |        |                 |

©2000-2006 Ingenuity Systems, Inc. All rights reserved.

| Name    | Synonyms     | Description                                                                         | Affymetrix | Location    | Family | Drugs | Entrez | Ger             | Entrez        | Ger        | Entrez | Ger       | Entrez | Ger | Entrez | Gene ID for Rat |
|---------|--------------|-------------------------------------------------------------------------------------|------------|-------------|--------|-------|--------|-----------------|---------------|------------|--------|-----------|--------|-----|--------|-----------------|
| BCL6    | BCL5, Bcl6   | B-cell CLL/lymphoma 6 (zinc finger protein 51)                                      | 203140_at  | 215990_s_   |        | 4     | 12     | Nucleus         | transcriptic  |            | 604    | 12053     | 303836 |     |        |                 |
| BCL2A1  | A1, A1-b, A  | BCL2-related protein A1                                                             | 205681_at  | 205681_at   |        | 3     | 5      | Cytoplasm       | other         |            | 597    | 12044 120 | 170929 |     |        |                 |
| BCL2L1  | Bcl(X)L, Bcl | BCL2-like 1                                                                         | --         | 215037_s_at |        |       | 5      | Cytoplasm       | other         |            | 598    | 12048     | 24888  |     |        |                 |
| FCGR2A  | CD16, CD16c  | Fc fragment of IgG, low affinity IIa, receptor (CD32)                               | --         | 1565674_at  |        |       | 2      | Plasma Membrane | transmembrane |            | 2212   | 14131     | 116591 |     |        |                 |
| GAB2    | AI463667,    | GRB2-associated binding protein 2                                                   | 238405_at  | 241004_at   |        | 3     | 4      | Cytoplasm       | other         |            | 9846   | 14389     | 84477  |     |        |                 |
| GSK3B   | 7330414F,    | glycogen synthase kinase 3 beta                                                     | --         | 209945_s_at |        |       | 5      | Nucleus         | kinase        | enzastauri | 2932   | 56637     | 84027  |     |        |                 |
| LYN     | AA407514     | v-src-related tyrosine kinase 1                                                     | 202626_s_  | 239555_at   |        | 3     | 4      | Cytoplasm       | kinase        |            | 4067   | 17096     | 81515  |     |        |                 |
| MAP2K6  | MAPK KIN     | mitogen-activated protein kinase kinase 6                                           | 205698_s_  | 205698_s_   |        | 2     | 15     | Cytoplasm       | kinase        |            | 5608   | 26399     | 114495 |     |        |                 |
| MAP3K2  | 9630061B,    | mitogen-activated protein kinase kinase kinase 2                                    | --         | 221695_s_at |        |       | 4      | Cytoplasm       | kinase        |            | 10746  | 26405     | 171492 |     |        |                 |
| MAPK1   | 9030612K,    | mitogen-activated protein kinase 1                                                  | --         | 242106_at   |        |       | 2      | Cytoplasm       | kinase        |            | 5594   | 26413     | 116590 |     |        |                 |
| MAPK14  | CRK1, CS1,   | mitogen-activated protein kinase 14                                                 | 202530_at  | 210449_x_   |        | 2     | 2      | Cytoplasm       | kinase        | SCIO-469   | 1432   | 26416     | 81649  |     |        |                 |
| NFKBIA  | AI462015,    | nuclear factor of kappa light polypeptide gene enhancer in B-cells inhibitor, alpha | 201502_s_  | 201502_s_   |        | 4     | 5      | Cytoplasm       | other         |            | 4792   | 18035     | 25493  |     |        |                 |
| PIK3AP1 | 1810044J,    | phosphoinositide-3-kinase adaptor protein 1                                         | 1554508_ε  | 1554508_at  |        |       |        | Cytoplasm       | other         |            | 118788 | 83490     | 294048 |     |        |                 |
| PIK3CB  | 1110001J,    | phosphoinositide-3-kinase, catalytic, beta polypeptide                              | --         | 217620_s_at |        |       | 5      | Cytoplasm       | kinase        |            | 5291   | 74769     | 85243  |     |        |                 |
| PTEN    | 2310035O,    | phosphatase and tensin homolog (mutated in multiple advanced cancers 1)             | 242622_x_  | 242622_x_   |        | 4     | 5, 19  | Cytoplasm       | phosphata     |            | 5728   | 19211     | 50557  |     |        |                 |
| PTPRC   | B220, CD140  | protein tyrosine phosphatase, receptor type, C                                      | 1569830_ε  | 1569830_ε   |        | 3     | 4      | Plasma Membrane | phosphata     |            | 5788   | 19264     | 24699  |     |        |                 |
| SOS1    | GF1, GGF     | son of sevenless homolog 1 (Drosophila)                                             | 229261_at  | 229261_at   |        | 5     | 18     | Cytoplasm       | other         |            | 6654   | 20662     | 313845 |     |        |                 |
| SOS2    | mSos1, Sc    | son of sevenless homolog 2 (Drosophila)                                             | 217644_s_  | 217644_s_   |        | 1     | 4      | Cytoplasm       | other         |            | 6655   | 20663     | 85384  |     |        |                 |

©2000-2006 Ingenuity Systems, Inc. All rights reserved.

| Name   | Synonyms    | Description                                                                        | Affymetrix | Location    | Family | Drugs | Entrez | Ger       | Entrez       | Ger       | Entrez | Ger   | Entrez | Ger | Entrez | Gene ID for Rat |
|--------|-------------|------------------------------------------------------------------------------------|------------|-------------|--------|-------|--------|-----------|--------------|-----------|--------|-------|--------|-----|--------|-----------------|
| BCL2A1 | A1, A1-b, A | BCL2-related protein A1                                                            | 205681_at  | 205681_at   |        | 3     | 5      | Cytoplasm | other        |           | 597    | 12044 | 1120   |     | 170929 |                 |
| BCL2L1 | Bcl(X)L, Bc | BCL2-like 1                                                                        | --         | 215037_s_at |        |       | 5      | Cytoplasm | other        |           | 598    | 12048 |        |     | 24888  |                 |
| CSF2RA | CD116, C    | colony stimulating factor 2 receptor, alpha, low-affinity (granulocyte-macrophage) | 207085_x_  | 210340_s_   |        | 1     | 1      | Plasma M  | transmemk    | sargramos | 1438   | 12982 |        |     |        |                 |
| HCK    | A1849071,   | hemopoietic cell kinase                                                            | 208018_s_  | 208018_s_   |        | 1     | 4      | Cytoplasm | kinase       |           | 3055   | 15162 |        |     | 25734  |                 |
| JAK2   | A1504024,   | Janus kinase 2 (a protein tyrosine kinase)                                         | 1562031_ε  | 1562031_ε   |        | 3     | 4      | Cytoplasm | kinase       |           | 3717   | 16452 |        |     | 24514  |                 |
| LYN    | AA407514    | v-src-1 Yamaguchi sarcoma viral related oncogene homolog                           | 202626_s_  | 239555_at   |        | 3     | 4      | Cytoplasm | kinase       |           | 4067   | 17096 |        |     | 81515  |                 |
| MAPK1  | 9030612K    | mitogen-activated protein kinase 1                                                 | --         | 242106_at   |        |       | 2      | Cytoplasm | kinase       |           | 5594   | 26413 |        |     | 116590 |                 |
| PIK3CB | 1110001J0   | phosphoinositide-3-kinase, catalytic, beta polypeptide                             | --         | 217620_s_at |        |       | 5      | Cytoplasm | kinase       |           | 5291   | 74769 |        |     | 85243  |                 |
| SOS1   | GF1, GGF    | son of sevenless homolog 1 (Drosophila)                                            | 229261_at  | 229261_at   |        | 5     | 18     | Cytoplasm | other        |           | 6654   | 20662 |        |     | 313845 |                 |
| STAT3  | 1110034C    | signal transducer and activator of transcription 3 (acute-phase response factor)   | 208992_s_  | 208992_s_   |        | 1     | 4      | Nucleus   | transcriptic |           | 6774   | 20848 |        |     | 25125  |                 |
| STAT5B | STAT5       | signal transducer and activator of transcription 5B                                | 205026_at  | 205026_at   |        | 3     | 4      | Nucleus   | transcriptic |           | 6777   | 20851 |        |     | 25126  |                 |



©2000-2006 Ingenuity Systems, Inc. All rights reserved.

| Name   | Synonyms    | Description                                                                         |
|--------|-------------|-------------------------------------------------------------------------------------|
| CITED2 | AI835299,   | Cbp/p300-interacting transactivator, with Glu/Asp-rich carboxy-terminal domain, 2   |
| FOS    | C-FOS, D1   | v-fos FBJ murine osteosarcoma viral oncogene homolog                                |
| IL1A   | IL-1, IL1-A | interleukin 1, alpha                                                                |
| IL1R1  | CD121A, C   | interleukin 1 receptor, type I                                                      |
| IL1R2  | CD121b, C   | interleukin 1 receptor, type II                                                     |
| MAPK1  | 9030612K    | mitogen-activated protein kinase 1                                                  |
| NFKBIA | AI462015,   | nuclear factor of kappa light polypeptide gene enhancer in B-cells inhibitor, alpha |
| SOS1   | GF1, GGF    | son of sevenless homolog 1 (Drosophila)                                             |
| SOS2   | mSos1, Sc   | son of sevenless homolog 2 (Drosophila)                                             |
| STAT5B | STAT5       | signal transducer and activator of transcription 5B                                 |

| Affymetrix | Location    | Family | Drugs | Entrez | Ger         | Entrez       | Ger       | Entrez | Ger   | Entrez | Ger | Entrez | Ger | Entrez | Gene ID for Rat |
|------------|-------------|--------|-------|--------|-------------|--------------|-----------|--------|-------|--------|-----|--------|-----|--------|-----------------|
| --         | 207980_s_at |        |       | 3      | Nucleus     | transcriptic |           | 10370  | 17684 | 114490 |     |        |     |        |                 |
| --         | 209189_at   | 17     |       | 1      | Nucleus     | transcriptic |           | 2353   | 14281 | 314322 |     |        |     |        |                 |
| --         | 208200_at   | 17     |       | 1      | Extracellul | cytokine     | IL-1 Trap | 3552   | 16175 | 24493  |     |        |     |        |                 |
| 202948_at  | 202948_at   | 2, 7   |       | 1      | Plasma Me   | transmemt    | anakinra  | 3554   | 16177 | 25663  |     |        |     |        |                 |
| 205403_at  | 205403_at   |        | 2     | 1      | Plasma Me   | transmemt    |           | 7850   | 16178 | 117022 |     |        |     |        |                 |
| --         | 242106_at   |        |       | 2      | Cytoplasm   | kinase       |           | 5594   | 26413 | 116590 |     |        |     |        |                 |
| 201502_s_  | 201502_s_   |        | 4     | 5      | Cytoplasm   | other        |           | 4792   | 18035 | 25493  |     |        |     |        |                 |
| 229261_at  | 229261_at   |        | 5     | 18     | Cytoplasm   | other        |           | 6654   | 20662 | 313845 |     |        |     |        |                 |
| 217644_s_  | 217644_s_   |        | 1     | 4      | Cytoplasm   | other        |           | 6655   | 20663 | 85384  |     |        |     |        |                 |
| 205026_at  | 205026_at   |        | 3     | 4      | Nucleus     | transcriptic |           | 6777   | 20851 | 25126  |     |        |     |        |                 |

©2000-2006 Ingenuity Systems, Inc. All rights reserved.

| Name      | Synonyms  | Description                                                             | Affymetrix | Location    | Family | Drugs    | Entrez | Ger       | Entrez       | Ger         | Entrez | Ger  | Entrez | Ger    | Entrez | Gene ID for Rat |
|-----------|-----------|-------------------------------------------------------------------------|------------|-------------|--------|----------|--------|-----------|--------------|-------------|--------|------|--------|--------|--------|-----------------|
| FOXO3A (i | 1110048B1 | forkhead box O3A                                                        | --         | 224889_at   |        |          | 23     | Nucleus   | transcriptic |             |        | 2309 | 56484  | 294515 |        |                 |
| GRB10     | 5730571D  | growth factor receptor-bound protein 10                                 | 209409_at  | 215248_at   |        | 3 11, 19 |        | Plasma Me | other        |             |        | 2887 | 14783  | 498416 |        |                 |
| GSK3B     | 7330414F  | glycogen synthase kinase 3 beta                                         | --         | 209945_s_at |        |          | 5      | Nucleus   | kinase       | enzastaurii |        | 2932 | 56637  | 84027  |        |                 |
| IRS2      | 4PS       | insulin receptor substrate 2                                            | --         | 209184_s_at |        |          | 5      | Cytoplasm | other        |             |        | 8660 | 384783 | 29376  |        |                 |
| JAK2      | AI504024, | Janus kinase 2 (a protein tyrosine kinase)                              | 1562031_ε  | 1562031_ε   |        | 3        | 4      | Cytoplasm | kinase       |             |        | 3717 | 16452  | 24514  |        |                 |
| MAPK1     | 9030612K  | mitogen-activated protein kinase 1                                      | --         | 242106_at   |        |          | 2      | Cytoplasm | kinase       |             |        | 5594 | 26413  | 116590 |        |                 |
| PIK3CB    | 1110001J0 | phosphoinositide-3-kinase, catalytic, beta polypeptide                  | --         | 217620_s_at |        |          | 5      | Cytoplasm | kinase       |             |        | 5291 | 74769  | 85243  |        |                 |
| PPP1R3D   | 2610024M  | protein phosphatase 1, regulatory subunit 3D                            | 204554_at  | 204555_s_   |        | 18       | 40     | Unknown   | phosphata    |             |        | 5509 | 228966 |        |        |                 |
| PTEN      | 2310035O  | phosphatase and tensin homolog (mutated in multiple advanced cancers 1) | 242622_x_  | 242622_x_   |        | 4 5, 19  |        | Cytoplasm | phosphata    |             |        | 5728 | 19211  | 50557  |        |                 |
| SOCS3     | ATOD4, CI | suppressor of cytokine signaling 3                                      | 227697_at  | 206359_at   |        | 1        | 4      | Cytoplasm | other        |             |        | 9021 | 12702  | 89829  |        |                 |
| SOS1      | GF1, GGF  | son of sevenless homolog 1 (Drosophila)                                 | 229261_at  | 229261_at   |        | 5        | 18     | Cytoplasm | other        |             |        | 6654 | 20662  | 313845 |        |                 |
| SOS2      | mSos1, Sc | son of sevenless homolog 2 (Drosophila)                                 | 217644_s_  | 217644_s_   |        | 1        | 4      | Cytoplasm | other        |             |        | 6655 | 20663  | 85384  |        |                 |

©2000-2006 Ingenuity Systems, Inc. All rights reserved.

| Name      | Synonyms  | Description                                            | Affymetrix | Location    | Family | Drugs    | Entrez | Ger       | Entrez       | Ger  | Entrez | Ger  | Entrez | Ger | Entrez | Gene ID for Rat |
|-----------|-----------|--------------------------------------------------------|------------|-------------|--------|----------|--------|-----------|--------------|------|--------|------|--------|-----|--------|-----------------|
| FOS       | C-FOS, D1 | v-fos FBJ murine osteosarcoma viral oncogene homolog   | --         | 209189_at   |        | 17       | 1      | Nucleus   | transcriptic |      |        | 2353 | 14281  |     |        | 314322          |
| FOXO3A (i | 1110048B1 | forkhead box O3A                                       | --         | 224889_at   |        |          | 23     | Nucleus   | transcriptic |      |        | 2309 | 56484  |     |        | 294515          |
| GRB10     | 5730571D  | growth factor receptor-bound protein 10                | 209409_at  | 215248_at   |        | 3 11, 19 |        | Plasma M  | other        |      |        | 2887 | 14783  |     |        | 498416          |
| IGF1R     | CD221, hy | insulin-like growth factor 1 receptor                  | --         | 203628_at   |        |          | 5      | Plasma M  | kinase       | IGF1 |        | 3480 | 16001  |     |        | 25718           |
| IRS2      | 4PS       | insulin receptor substrate 2                           | --         | 209184_s_at |        |          | 5      | Cytoplasm | other        |      |        | 8660 | 384783 |     |        | 29376           |
| MAPK1     | 9030612K  | mitogen-activated protein kinase 1                     | --         | 242106_at   |        |          | 2      | Cytoplasm | kinase       |      |        | 5594 | 26413  |     |        | 116590          |
| PIK3CB    | 1110001J0 | phosphoinositide-3-kinase, catalytic, beta polypeptide | --         | 217620_s_at |        |          | 5      | Cytoplasm | kinase       |      |        | 5291 | 74769  |     |        | 85243           |
| PXN       | AW108311  | paxillin                                               | 211823_s_  | 211823_s_   |        | 4        | 4      | Cytoplasm | other        |      |        | 5829 | 19303  |     |        | 360820          |
| SOS1      | GF1, GGF  | son of sevenless homolog 1 (Drosophila)                | 229261_at  | 229261_at   |        | 5        | 18     | Cytoplasm | other        |      |        | 6654 | 20662  |     |        | 313845          |
| SOS2      | mSos1, Sc | son of sevenless homolog 2 (Drosophila)                | 217644_s_  | 217644_s_   |        | 1        | 4      | Cytoplasm | other        |      |        | 6655 | 20663  |     |        | 85384           |

©2000-2006 Ingenuity Systems, Inc. All rights reserved.

| Name    | Synonyms   | Description                                                                       | Affymetrix | Location          | Family | Drugs    | Entrez | Ger       | Entrez      | Ger         | Entrez | Ger   | Entrez | Ger | Entrez | Ger | Entrez | Gene ID for Rat |
|---------|------------|-----------------------------------------------------------------------------------|------------|-------------------|--------|----------|--------|-----------|-------------|-------------|--------|-------|--------|-----|--------|-----|--------|-----------------|
| ACTB    |            | Actin beta, actin, beta                                                           | --         | AFFX-HSAC07/X0035 |        |          | 10     | Cytoplasm | other       |             |        | 60    | 11461  |     |        |     |        | 81822           |
| ACTN1   | 3110023F1  | actinin, alpha 1                                                                  | --         | 208637_x_at       |        |          | 6      | Cytoplasm | other       |             |        | 87    | 109711 |     |        |     |        | 81634           |
| ARF1    | MGC72830   | ADP-ribosylation factor 1                                                         | --         | 208750_s_at       |        |          | 4      | Cytoplasm | transporter |             |        | 375   | 11840  |     |        |     |        | 64310           |
| ARHGAP2 | 1810044B   | Rho GTPase activating protein 26                                                  | --         | 244548_at         |        |          | 18     | Cytoplasm | other       |             |        | 23092 | 71302  |     |        |     |        | 307459          |
| ARPC4   | 20kDa, 53  | actin related protein 2/3 complex, subunit 4, 20kDa                               | --         | 211672_s_at       |        |          | 1      | Unknown   | other       |             |        | 10093 | 68089  |     |        |     |        | 297518          |
| ARPC5   | 165kDa, 5  | actin related protein 2/3 complex, subunit 5, 16kDa                               | --         | 237387_at         |        |          | 1      | Cytoplasm | other       |             |        | 10092 | 67771  |     |        |     |        | 360854          |
| DDEF1   | AMAP1, A   | development and differentiation enhancing factor 1                                | 221039_s_  | 224796_at         |        | 3        | 4      | Plasma M  | other       |             |        | 50807 | 13196  |     |        |     |        | 314961          |
| GSK3B   | 7330414F   | glycogen synthase kinase 3 beta                                                   | --         | 209945_s_at       |        |          | 5      | Nucleus   | kinase      | enzastaurii |        | 2932  | 56637  |     |        |     |        | 84027           |
| ITGA7   | alpha7, FL | integrin, alpha 7                                                                 | 216331_at  | 216331_at         |        | 15       | 9      | Plasma M  | other       |             |        | 3679  | 16404  |     |        |     |        | 81008           |
| MAPK1   | 9030612K   | mitogen-activated protein kinase 1                                                | --         | 242106_at         |        |          | 2      | Cytoplasm | kinase      |             |        | 5594  | 26413  |     |        |     |        | 116590          |
| PIK3CB  | 1110001J0  | phosphoinositide-3-kinase, catalytic, beta polypeptide                            | --         | 217620_s_at       |        |          | 5      | Cytoplasm | kinase      |             |        | 5291  | 74769  |     |        |     |        | 85243           |
| PTEN    | 2310035O   | phosphatase and tensin homolog (mutated in multiple advanced cancers 1)           | 242622_x_  | 242622_x_         |        | 4 5, 19  |        | Cytoplasm | phosphata   |             |        | 5728  | 19211  |     |        |     |        | 50557           |
| PXN     | AW108311   | paxillin                                                                          | 211823_s_  | 211823_s_         |        | 4        | 4      | Cytoplasm | other       |             |        | 5829  | 19303  |     |        |     |        | 360820          |
| RALB    | 5730472O   | v-ral simian leukemia viral oncogene homolog B (ras related; GTP binding protein) | 202101_s_  | 202101_s_         |        | 3        | 4      | Cytoplasm | enzyme      |             |        | 5899  | 64143  |     |        |     |        | 116546          |
| RHOG    | ARHG, MC   | ras homolog gene family, member G (rho G)                                         | --         | 203175_at         |        |          | 20     | Cytoplasm | enzyme      |             |        | 391   | 56212  |     |        |     |        | 308875          |
| SOS1    | GF1, GGF   | son of sevenless homolog 1 (Drosophila)                                           | 229261_at  | 229261_at         |        | 5        | 18     | Cytoplasm | other       |             |        | 6654  | 20662  |     |        |     |        | 313845          |
| SOS2    | mSos1, Sc  | son of sevenless homolog 2 (Drosophila)                                           | 217644_s_  | 217644_s_         |        | 1        | 4      | Cytoplasm | other       |             |        | 6655  | 20663  |     |        |     |        | 85384           |
| TLN1    | ILWEQ, Kl  | talin 1                                                                           | 203254_s_  | 203254_s_         |        | 4        | 21     | Plasma M  | other       |             |        | 7094  | 21894  |     |        |     |        | 313494          |
| VASP    | Vasp (pred | vasodilator-stimulated phosphoprotein                                             | 202205_at  | 202205_at         |        | 13 6, 21 |        | Plasma M  | other       |             |        | 7408  | 22323  |     |        |     |        | 361517          |
| ZYX     | 9530098H   | zyxin                                                                             | 215706_x_  | 200808_s_         |        | 13       | 6      | Plasma M  | other       |             |        | 7791  | 22793  |     |        |     |        | 114636          |

t
