# Supplementary material
Source: PubMed Central journal article supplement (PMC2014731)
Supplement: 07_065_Shanley_Suppl_Figures.pdf [file 07_065_Shanley_Suppl_Figures.pdf]

## Supplementary Figure 1: Network Legend

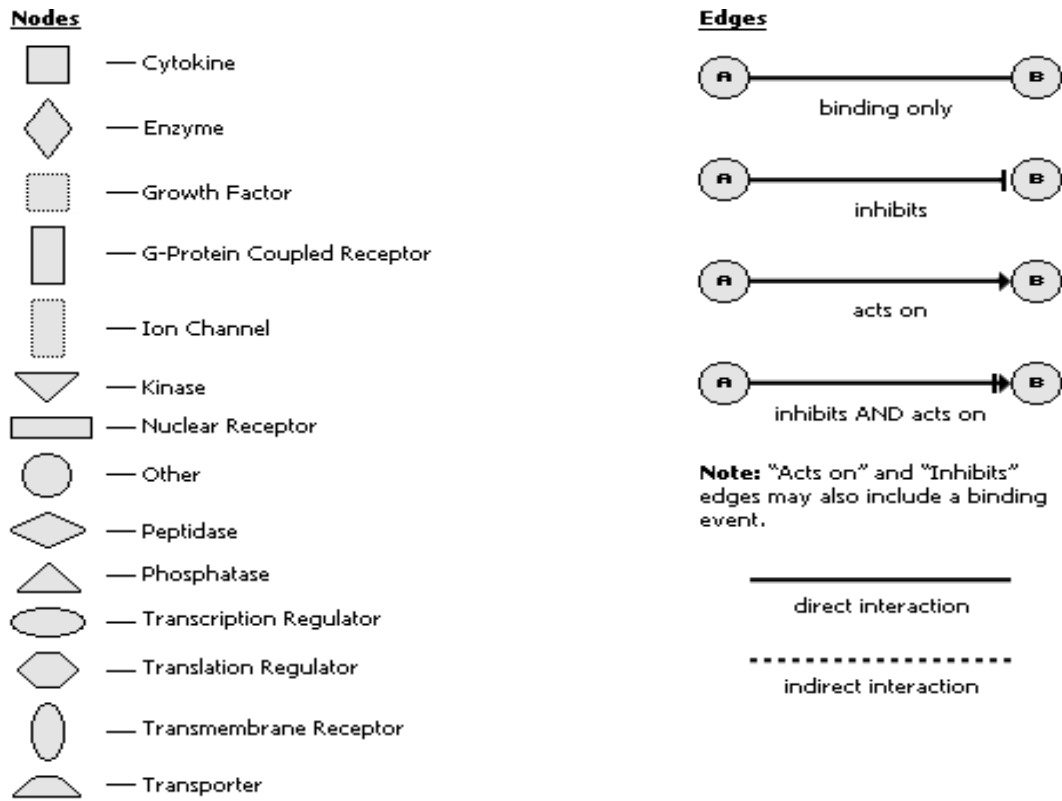

An arrow pointing from A to B signifies different actions for different circumstances, as described below:

**For signaling pathways:**

An arrow pointing from A to B signifies that A causes B to be activated (includes any direct interaction: e.g. binding, phosphorylation, dephosphorylation, etc).

**For metabolic pathways:**

An arrow pointing from A to B signifies that B is produced from A.

**For ligands/receptors:**

An arrow pointing from a ligand to a receptor signifies that the ligand binds the receptor and subsequently leads to activation of the receptor. This binding event does not necessarily directly activate the receptor; activation of the receptor could be caused by events secondary to the ligand/receptor binding event.

\*Downloaded from <http://www.ingenuity.com/>, accessed March 8, 2006.

Supplementary Figure 2: Day 1 upregulated network centered on MAPK14

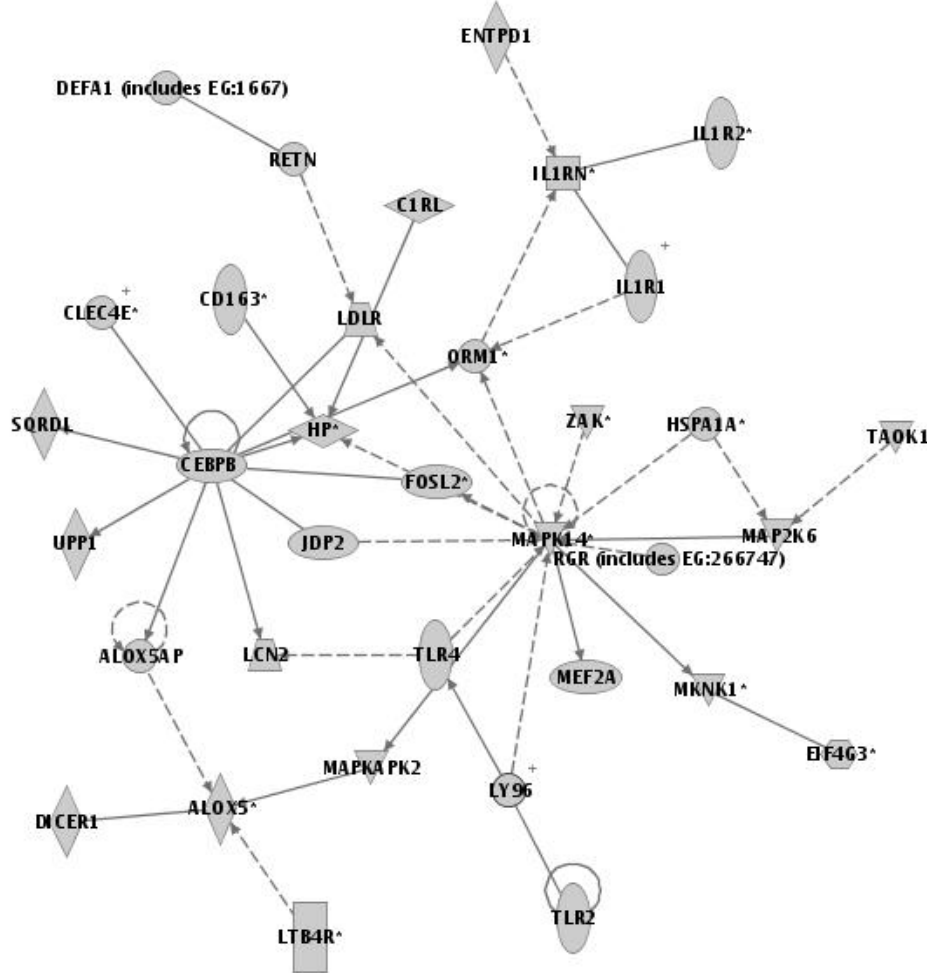

©2000–2006 Ingenuity Systems, Inc. All rights reserved.

Supplementary Figure 3: Day 1 upregulated network centered on STAT3

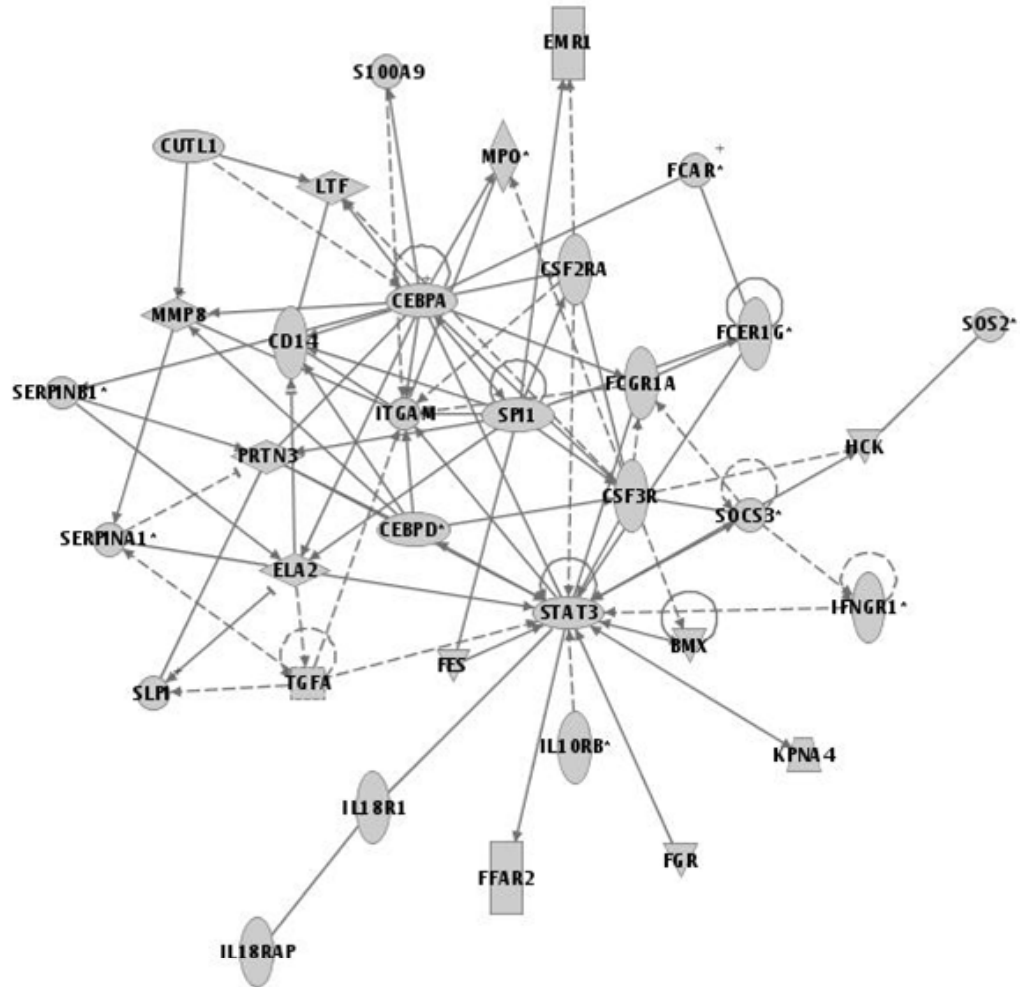

©2000-2006 Ingenuity Systems, Inc. All rights reserved.

Supplementary Figure 4: Day 1 upregulated network centered on LYN

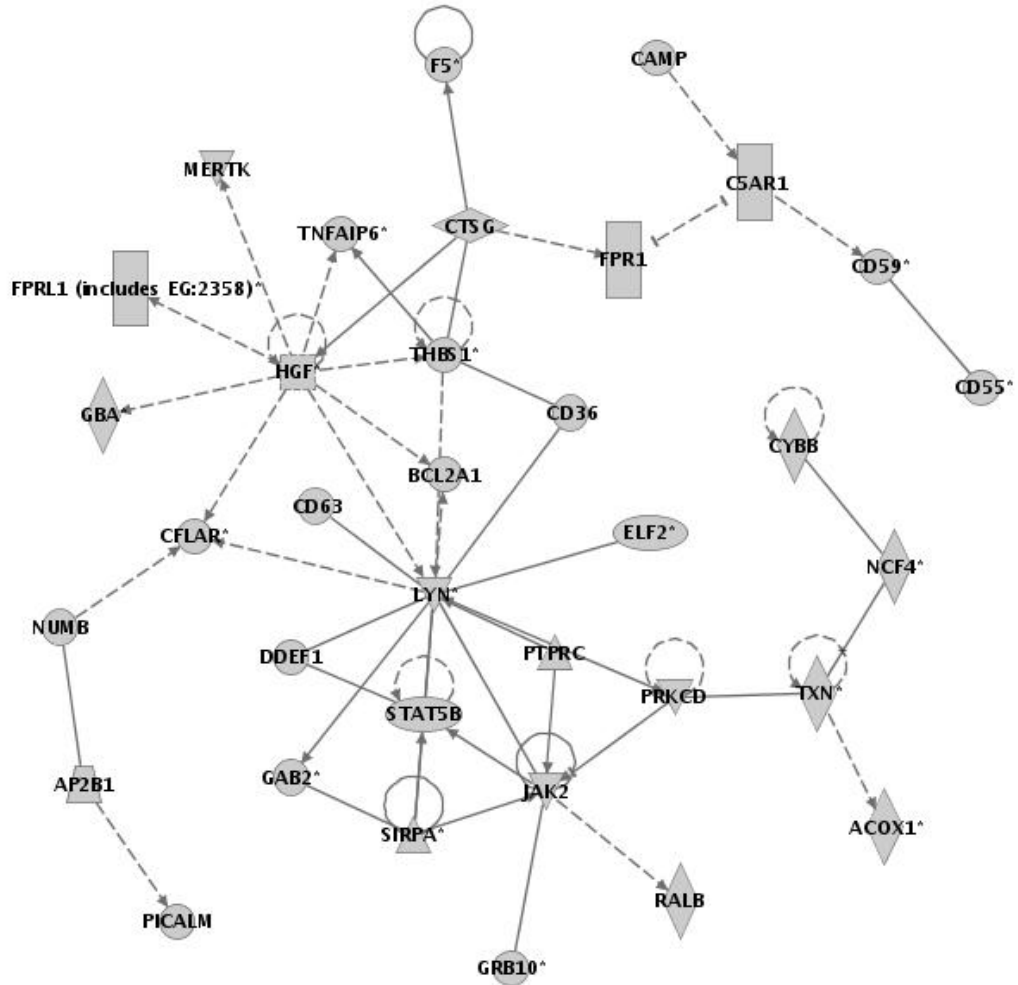

©2000-2006 Ingenuity Systems, Inc. All rights reserved.

Supplementary Figure 5: Day 3 upregulated network centered on FOS and IL1A

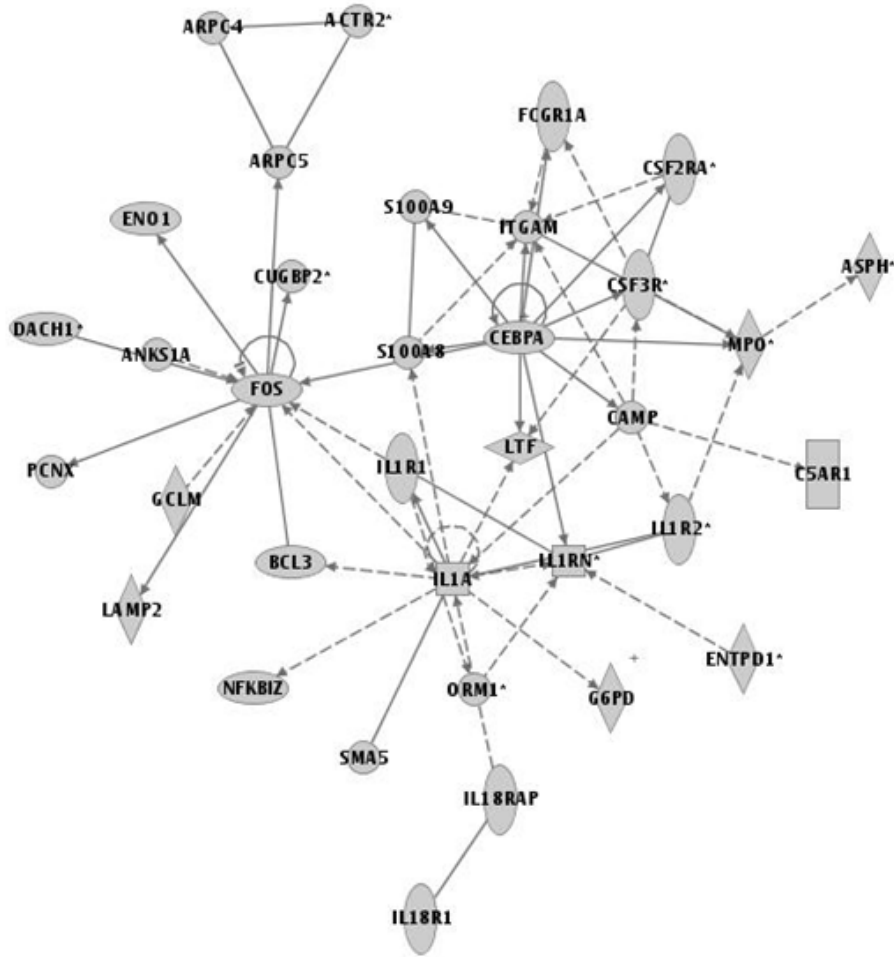

©2000–2006 Ingenuity Systems, Inc. All rights reserved.

Supplementary Figure 6: Day 3 upregulated network centered on MAPK1

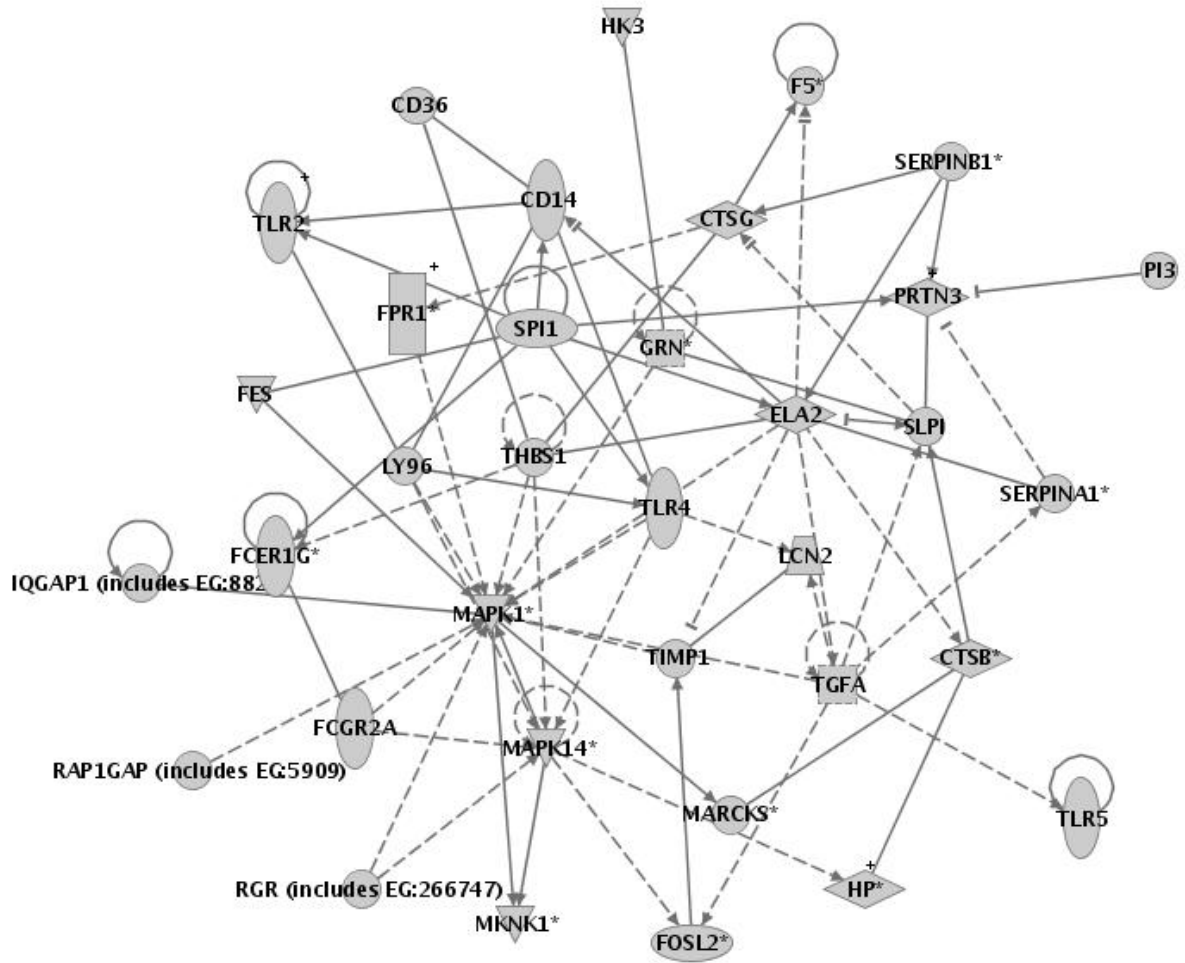

©2000-2006 IngenuitySystems, Inc. All rights reserved.

**Supplementary Figure 7: Day 3 upregulated network centered on STAT3 and STAT5**

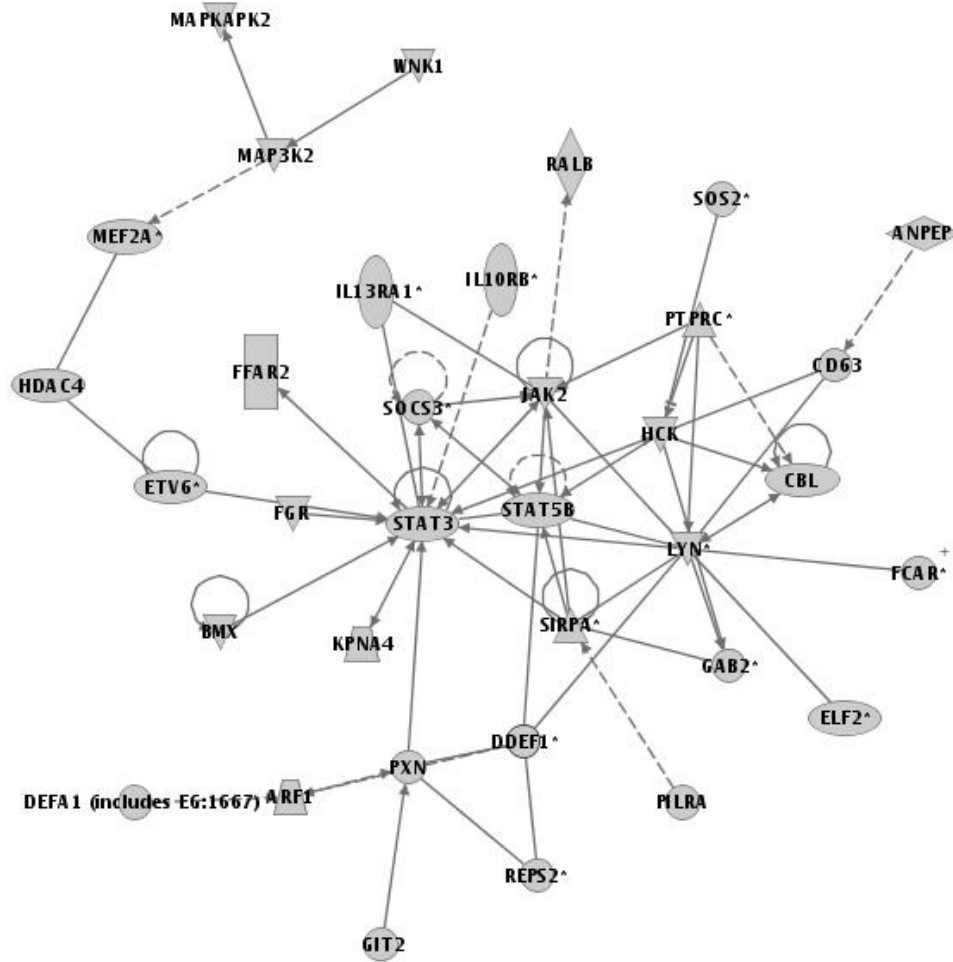

©2000–2006 Ingenuity Systems, Inc. All rights reserved.

Supplementary Figure 8: Day 3 upregulated network centered on NFKB1A

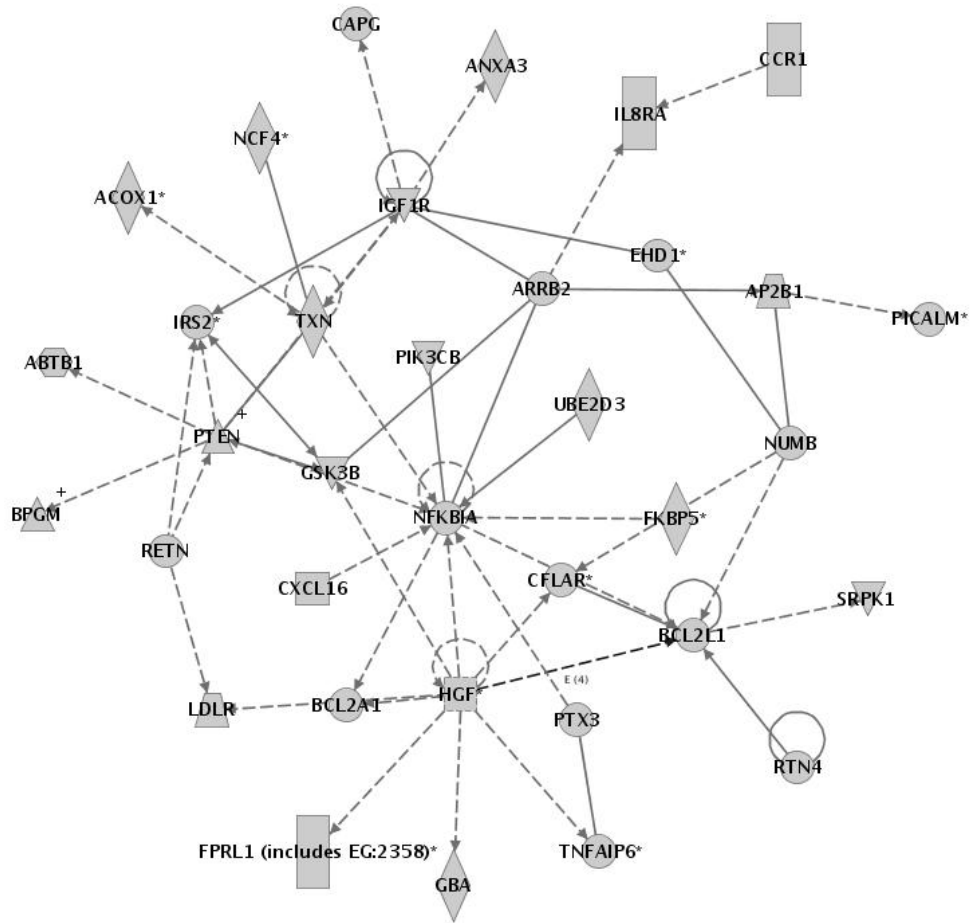

©2000–2006 Inqenuity Systems, Inc. All rights reserved.



Supplementary Figure 9: Day 1 downregulated network centered on BCL2

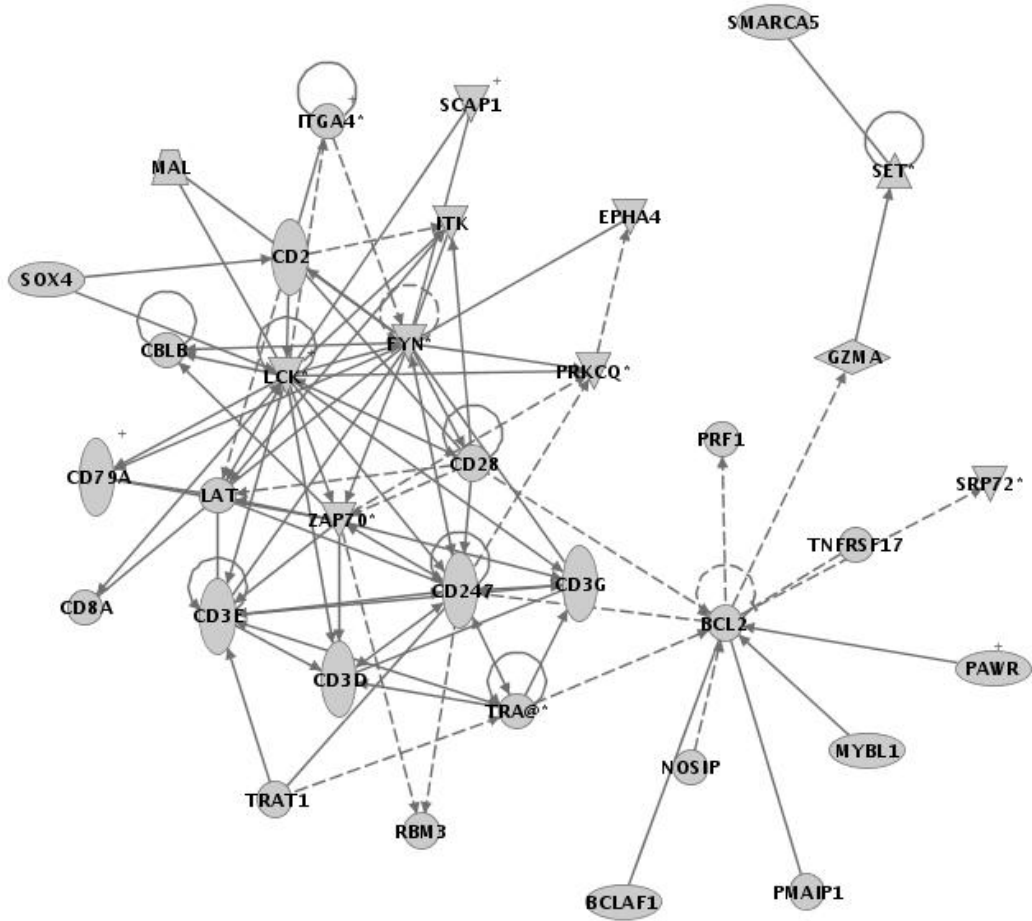

©2000–2006 Inaenuity System s. Inc. All rights reserved.

Supplementary Figure 10: Day 1 downregulated network centered on TCF3

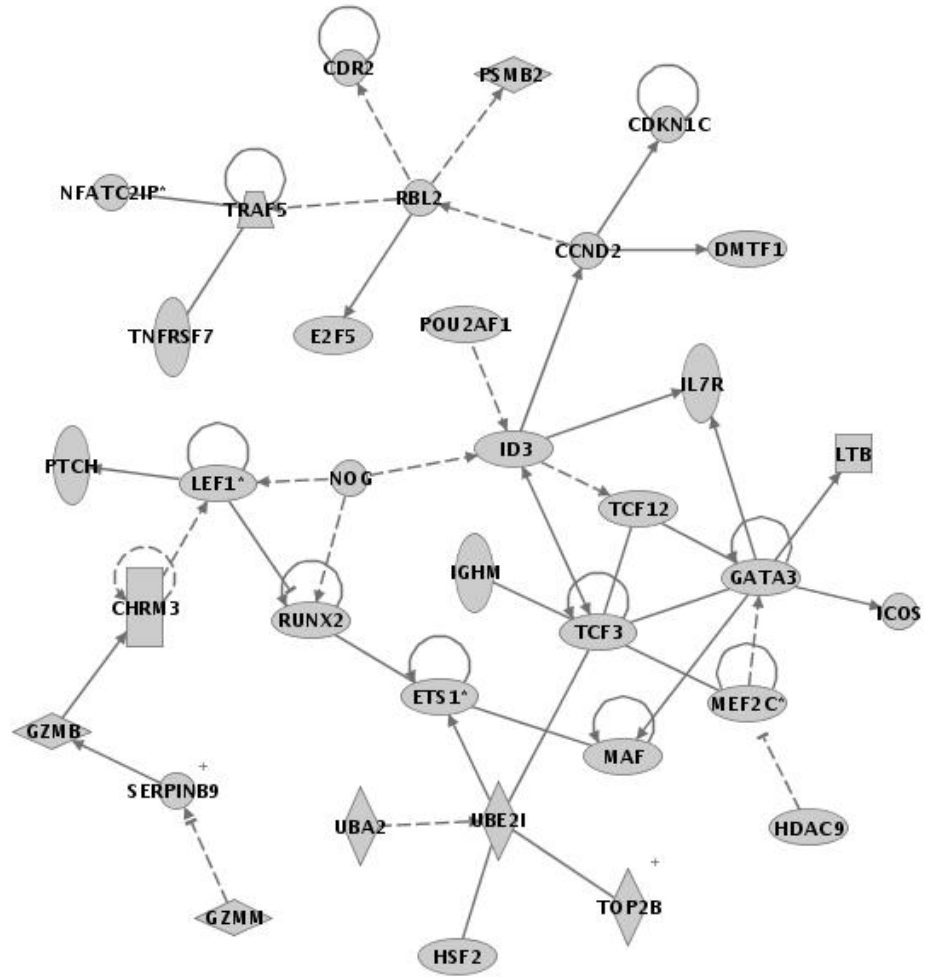

©2000-2006 Ingenuity Systems, Inc. All rights reserved.

Supplementary Figure 11: Day 3 downregulated network centered on BCL2

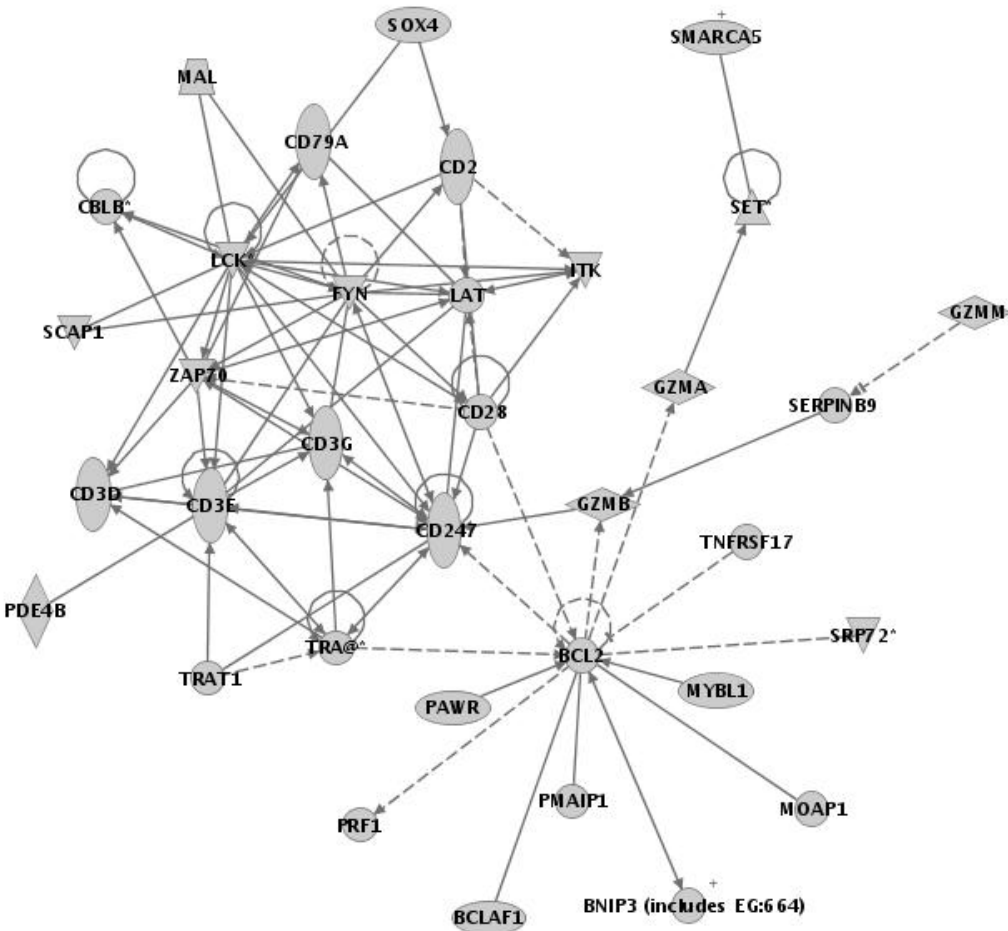

©2000–2006 Ingenuity Systems, Inc. All rights reserved.

Supplementary Figure 12: Day 3 downregulated network centered on IL8 and GATA3

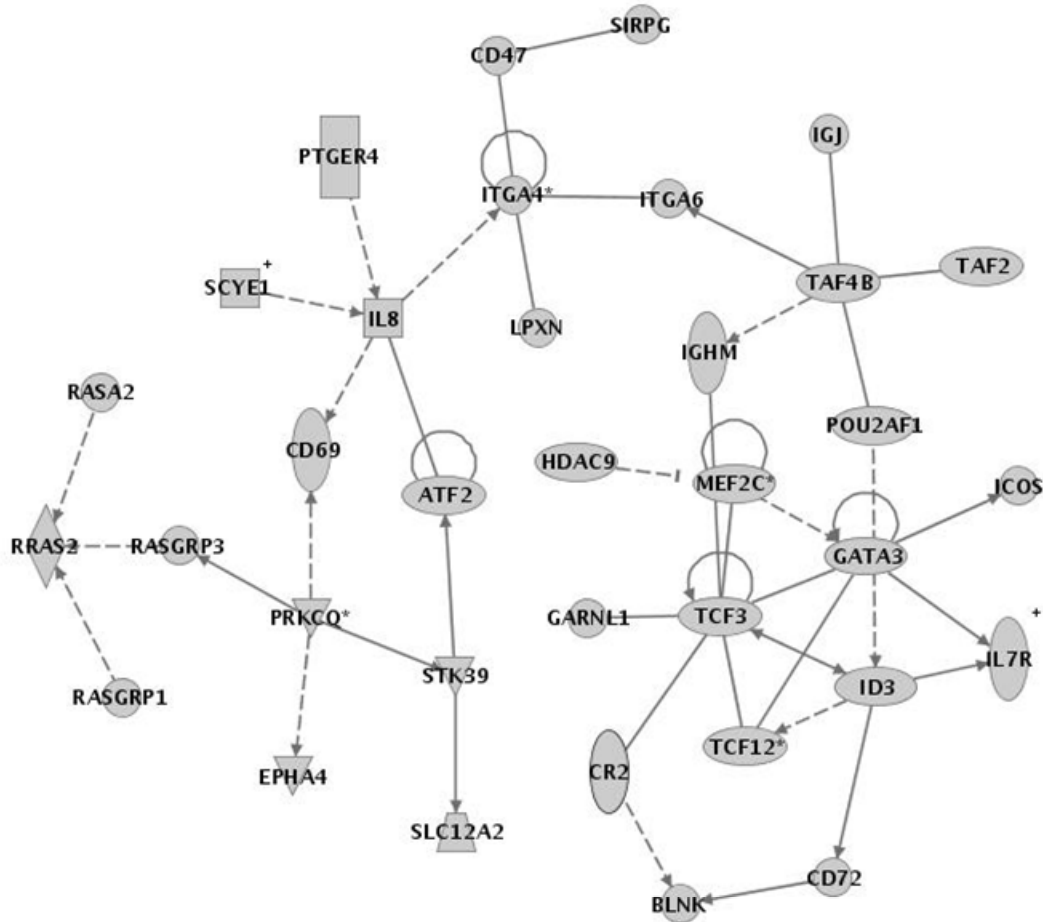

©2000–2006 Inaenuity Systems, Inc. All rights reserved.

Supplementary Figure 13: Day 3 downregulated network related to HLA

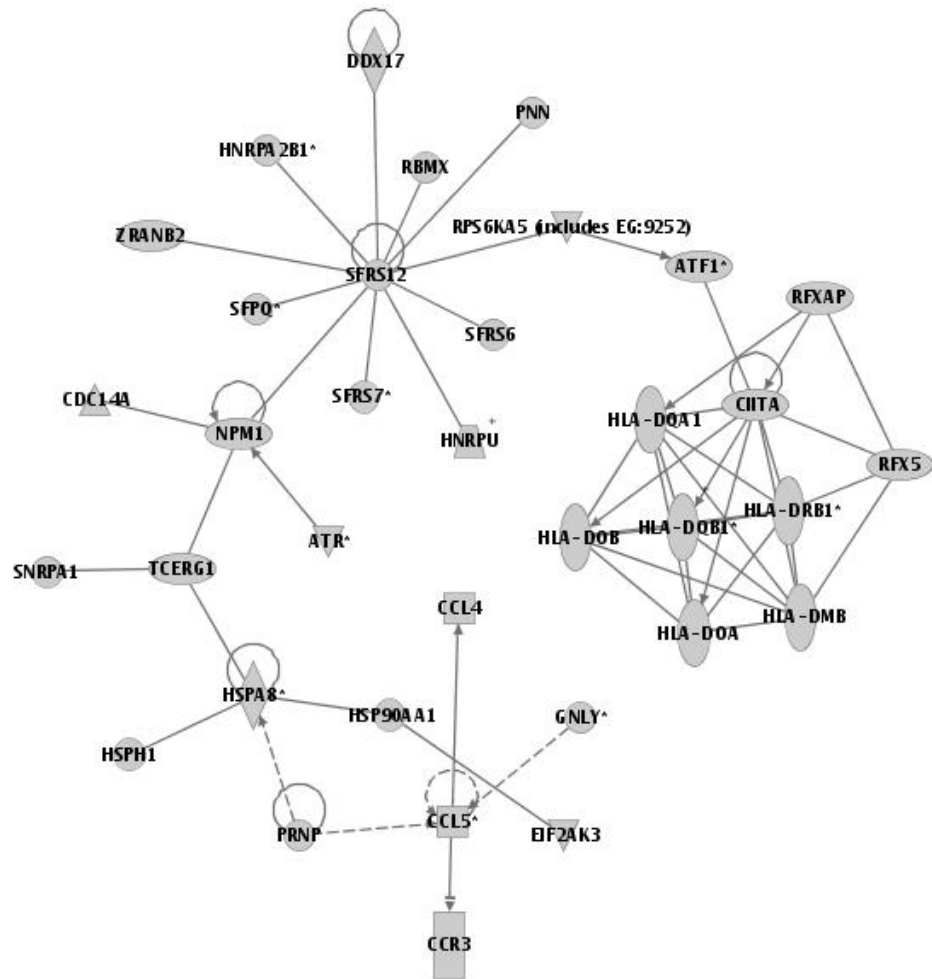

©2000-2006 Inaenuity Systems, Inc. All rights reserved.
